# Supplementary material
Source: PubMed Central journal article supplement (PMC3882197)
Supplement: NIHMS537581-supplement-SI_material.pdf [file NIHMS537581-supplement-SI_material.pdf]

**A Gold-Catalyzed Enantioselective Cope Rearrangement of Achiral 1,5-Dienes**Ryan J. Felix,<sup>†</sup> Dieter S. Weber,<sup>†</sup> Osvaldo Gutierrez,<sup>‡</sup> Dean J. Tantillo,<sup>‡\*</sup>Michel R. Gagné<sup>†\*</sup>

<sup>†</sup>Department of Chemistry, University of North Carolina at Chapel Hill, Chapel Hill, NC 27599-3290. <sup>‡</sup>Department of Chemistry, University of California at Davis, Davis, CA 95616.

## Table of Contents

|                                                  |           |
|--------------------------------------------------|-----------|
| <b>1. General Information</b>                    | <b>2</b>  |
| <b>2. Catalyst Optimization Experiments</b>      | <b>3</b>  |
| <b>3. Representative Experimental Procedures</b> | <b>5</b>  |
| <b>4. NMR Spectra</b>                            | <b>21</b> |
| <b>5. Gas Chromatography/SFC Results</b>         | <b>48</b> |
| <b>6. Quantum Calculations and Discussion</b>    | <b>56</b> |
| <b>7. Crystallographic Data</b>                  | <b>94</b> |

## 1. General Information

All reagents were reagent grade quality and used as received from Aldrich unless otherwise noted. Anhydrous THF (Stabilized, 99.9%, Acros Organics) and 1,2-Dichloroethane (99.8+%, extra pure) were purchased from Fisher Scientific and used as received. Phosphorous ligands were purchased from Strem Chemicals, Inc. and used without further purification. All glassware was flame dried under vacuum unless otherwise indicated. Anhydrous  $\text{CH}_2\text{Cl}_2$ , diethyl ether, and pentanes were passed through a column of alumina.<sup>1</sup> Column chromatography was performed using SilaFlash P60 40-63  $\mu\text{m}$  (230-400 mesh). All NMR spectra were recorded on either a Bruker Avance 600 MHz or 400 MHz spectrometer at STP. All deuterated solvents were used as received from Cambridge Isotope Laboratories, Inc.  $^1\text{H}$ ,  $^{13}\text{C}$ , and  $^{31}\text{P}$  NMR chemical shifts are reported in parts per million (ppm) relative to residual solvent resonances ( $\text{CDCl}_3$  or  $\text{CD}_2\text{Cl}_2$ ) or an external standard ( $\text{H}_3\text{PO}_4$ , 85%, 0 ppm). GC-MS data was obtained using an Agilent G2570A GC/MSD system containing a 6850 GC equipped with an HP-5MS column (length 30 m.; I.D. 0.250 mm) connected to an Agilent 5983N MSD. Enantiomeric excess (*e.e.*'s) were determined on a HP-6890 GC using an Agilent  $\beta$ -Cyclosil column (length 30 m, I.D. 0.250 mm) or using a Berger Instruments SFC equipped with a Chiralpak AD-H column (length 250 mm, I.D. 4.6 mm). High resolution mass spectra (HRMS) were obtained from the University of Illinois Mass Spectrometry lab (Dr. Furong Sun).

---

<sup>1</sup> Pangborn, A. B.; Giardello, M. A.; Grubbs, R. H.; Rosen, R. K.; Timmers, F. J. *Organometallics*, **1996**, *15*, 1518.

## 2. Catalyst Optimization Results

### A. General Reaction Parameter Screening

Reaction conditions: 5 mol% Au(I) catalyst, 10.5 mol% Ag salt, 18 h.

Enantioselectivities determined by chiral GC.

**Supplementary Table 1.** Solvent effects on the Au(I) catalyzed Cope rearrangement.

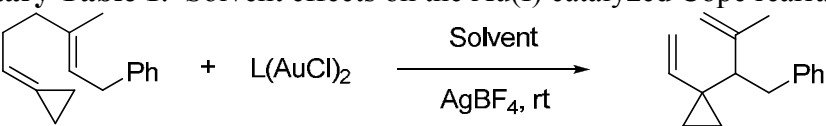

| Ligand          | Solvent           | <i>e.e.</i> (%) |
|-----------------|-------------------|-----------------|
| (R)-BINAP       | DCM               | 15              |
| (R)-BINAP       | MeNO <sub>2</sub> | 19              |
| (R)-xylyl-BINAP | MeNO <sub>2</sub> | 20              |
| (R)-xylyl-BINAP | 1,2-DCE           | 24              |
| (R)-xylyl-BINAP | Toluene           | 15              |
| (R)-xylyl-BINAP | Et <sub>2</sub> O | 0               |

**Supplementary Table 2.** Temperature effects on the Au(I) catalyzed Cope rearrangement.

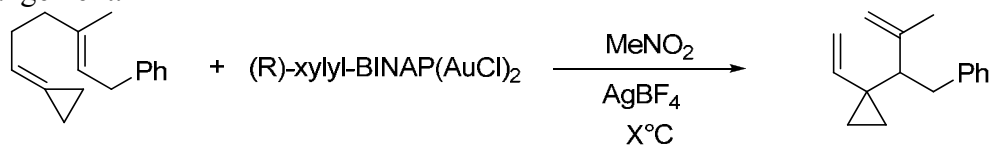

| Temperature (°C) | <i>e.e.</i> (%) |
|------------------|-----------------|
| R.T.             | 20              |
| 0                | 22              |
| -5               | 24              |
| -20              | 25              |

**Supplementary Table 3.** Counter-ion effects on Au(I) catalyzed Cope rearrangement.

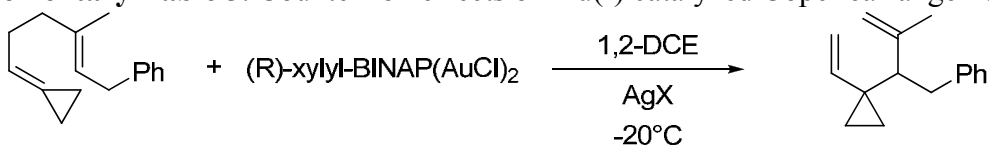

| X <sup>-</sup>                | <i>e.e.</i> (%) |
|-------------------------------|-----------------|
| BF <sub>4</sub> <sup>-</sup>  | 25              |
| OTf <sup>-</sup>              | 37 <sup>a</sup> |
| PF <sub>6</sub> <sup>-</sup>  | 34              |
| SbF <sub>6</sub> <sup>-</sup> | 32              |
| NTf <sub>2</sub> <sup>-</sup> | 32              |

<sup>a</sup> Reaction only proceeded to 50% completion (GC-MS).

**Supplementary Table 4.** Ligand effects on Au(I) catalyzed Cope rearrangement.

| Entry | Ligand                               | T (°C) | <i>e.e.</i> (%) |
|-------|--------------------------------------|--------|-----------------|
| 1     | (R)-xylyl-BINAP                      | 0      | 28              |
| 2     | (R)-xylyl-BINAP                      | -20    | 34              |
| 3     | (R)-xylyl-MeO-BIPHEP                 | -20    | 19              |
| 4     | (R)-SEGPPOS                          | -20    | 16              |
| 5     | (R)-DIFLUORPHOS                      | -20    | 9               |
| 6     | (R)-xyl-SDP                          | -20    | 5               |
| 7     | (R)-DTBM-SEGPPOS(AuCl) <sub>2</sub>  | -20    | 25              |
| 8     | (R,R)-Me-DuPHOS                      | 0      | 2               |
| 9     | (R)-SYNPHOS                          | 0      | 15              |
| 10    | (S)-3,5-xylyl-PHANEPHOS ( <b>4</b> ) | -20    | 79              |
| 11    | (S)-SIPHOS-PE                        | 0      | 7               |
| 12    | Ag-(R)-(5)                           | rt     | -               |

### B. Optimization for (S)-3,5-xylyl-PHANEPHOS(AuCl)<sub>2</sub> (**4**).

Reactions Conditions: 5 mol% **4**, 18 h.

Enantioselectivities determined by chiral GC.

**Supplementary Table 5.** Optimization of Cope Reaction catalyzed by **4**.

| X              | Y <sup>-</sup>               | T (°C) | Solvent | <i>e.e.</i> (%) |
|----------------|------------------------------|--------|---------|-----------------|
| 1 <sup>a</sup> | PF <sub>6</sub> <sup>-</sup> | -20    | 1,2-DCE | 58              |



|                |                  |     |                    |    |
|----------------|------------------|-----|--------------------|----|
| 2.1            | PF <sub>6</sub>  | -20 | 1,2-DCE            | 79 |
| 4              | PF <sub>6</sub>  | -20 | 1,2-DCE            | 82 |
| 4              | PF <sub>6</sub>  | -20 | DCM                | 77 |
| 4              | PF <sub>6</sub>  | -20 | MeNO <sub>2</sub>  | 81 |
| 4 <sup>a</sup> | PF <sub>6</sub>  | -50 | DCM                | 66 |
| 4              | BF <sub>4</sub>  | -20 | 1,2-DCE            | 81 |
| 4              | OTf              | -20 | 1,2-DCE            | 74 |
| 4              | SbF <sub>6</sub> | -20 | 1,2-DCE            | 83 |
| 4              | NTf <sub>2</sub> | -20 | 1,2-DCE            | 82 |
| 4              | SbF <sub>6</sub> | -35 | DCM:1,2-DCE<br>1:9 | 87 |

<sup>a</sup> Reaction did not go to completion.

### 3. Representative Experimental Procedures.

#### A. Preparation of Gold(I) Catalysts

Bis(phosphine) gold(I) catalysts were prepared by a modification to a procedure previously reported.<sup>2</sup> Spectroscopic data for the Au(I) complexes used in the optimization study have been reported previously.<sup>3,4,5,6</sup> To a solution of (S)-3,5-xylyl-PHANEPHOS (0.094 g, 0.136 mmol, 1.00 eq.) in CH<sub>2</sub>Cl<sub>2</sub> (4 mL) at rt under air was added Me<sub>2</sub>S·AuCl (0.080 g, 0.272 mmol, 2.00 eq.). The reaction was stirred for 2 h at rt, then concentrated and dried under vacuum overnight to provide the product compound as a white solid (0.128 g, 82%). X-ray quality crystals were obtained by layering a solution of **4**, in benzene, with pentanes and storing at 4°C.

<sup>2</sup> Kleinbeck, F.; Toste, F. D. *J. Am. Chem. Soc.* **2009**, *131*, 9178.

<sup>3</sup> Johansson, M. J.; Gorin, D. J.; Stabe, S. T.; Toste, F. D. *J. Am. Chem. Soc.* **2005**, *127*, 18002.

<sup>4</sup> Melhado, A. D.; Luparia, M.; Toste, F. D. *J. Am. Chem. Soc.* **2007**, *129*, 12638.

<sup>5</sup> Pradal, A.; Chao, M-C.; Vitale, M. R.; Toullec, P. Y.; Michelet, V. *Tetrahedron*, **2011**, *67*, 4371.

<sup>6</sup> Hamilton, G. L.; Kang, E. J.; Mba, M.; Toste, F. D. *Science*, **2007**, *317*, 496.

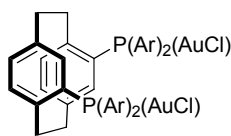

Ar = 3,5-xylyl

4

**(S)-3,5-xylyl-PHANEPHOS(AuCl)<sub>2</sub> (4):** <sup>1</sup>H-NMR (600 MHz, CD<sub>2</sub>Cl<sub>2</sub>) δ 7.28-7.19 (m, 8H), 7.10-7.05 (m, 6H), 6.82-6.80 (m, 2H), 6.74-6.72 (m, 2H), 3.76-3.69 (m, 2H), 3.30 (t, *J* = 12 Hz, 2H), 3.07 (t, *J* = 12 Hz, 2H), 2.80-2.78 (m, 2H), 2.43 (s, 12H), 2.21 (s, 12H); <sup>13</sup>C-NMR (150 MHz, CD<sub>2</sub>Cl<sub>2</sub>) δ 145.0, 144.9, 140.7, 140.6, 139.9, 139.8, 139.2, 139.1, 137.5, 135.9, 135.8, 135.0, 134.9, 133.8, 133.7, 133.6, 133.5, 132.8, 132.4, 131.7, 131.6, 128.2, 127.8, 127.4, 34.9, 34.8, 34.4, 22.0, 21.5; <sup>31</sup>P-NMR (162 MHz, CD<sub>2</sub>Cl<sub>2</sub>) δ 31.5.

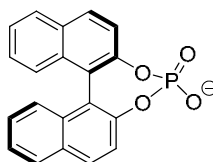

Ag-(R)-5

## B. Synthesis of 1,5-Dienes

General Procedure for Wittig cyclopropylidination<sup>7</sup>

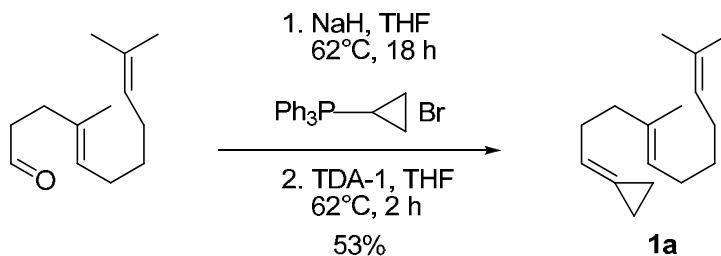

To a Schlenk flask loaded with a suspension of dry NaH (0.075 g, 3.15 mmol, 1.30 eq.) in THF (13 mL) under N<sub>2</sub> atmosphere was added cyclopropyltriphenylphosphonium bromide (1.21 g, 3.15 mmol, 1.30 eq.) at rt. The reaction flask was then equipped with a

<sup>7</sup> Stafford, J. A.; McMurry, J. E. *Tetrahedron Lett.* **1988**, 29, 2531.

condenser and heated to 62°C for 18 h. To the resulting orange suspension was then added (E)-4,10-dimethylundeca-4,9-dienal<sup>8</sup> (0.469 g, 2.42 mmol, 1.00 eq.) and tris[2-(2-methoxyethoxy)ethyl]amine (TDA-1) (0.077 mL, 0.242 mmol, 0.10 eq.) in THF (4 mL). The reaction was stirred for 2 h at 62°C before cooling to rt and quenching with saturated aqueous NaHCO<sub>3</sub>. The reaction was diluted with deionized H<sub>2</sub>O and Et<sub>2</sub>O before separating the layers. The aqueous layer was extracted with Et<sub>2</sub>O (2x) and the combined organic layers were then washed with brine (2x). The organic layer was then dried over MgSO<sub>4</sub>, filtered, and concentrated *in vacuo*. Purification by silica gel chromatography (Hexanes) provided the product compound as a colorless oil (0.283 g, 53%). A small amount of CH<sub>2</sub>Cl<sub>2</sub> was used to load the material onto the column.

**(E)-(4,10-dimethylundeca-4,9-dienylidene)cyclopropane (1a)**: <sup>1</sup>H-NMR (600 MHz, CD<sub>2</sub>Cl<sub>2</sub>) δ 5.75-5.72 (m, 1H), 5.16-5.10 (m, 2H), 2.29-2.25 (m, 2H), 2.12-2.09 (m, 2H), 1.99-1.94 (m, 4H), 1.68 (s, 3H), 1.60 (s, 3H), 1.59 (s, 3H), 1.37-1.32 (m, 2H), 1.02-1.00 (m, 4H); <sup>13</sup>C-NMR (150 MHz, CD<sub>2</sub>Cl<sub>2</sub>) δ 135.4, 131.8, 125.2, 125.2, 121.5, 118.5, 39.9, 31.0, 30.6, 28.1, 28.0, 26.0, 17.9, 16.2, 2.5, 2.1. HRMS (EI+) calculated for C<sub>16</sub>H<sub>26</sub> 218.20345, found 218.20366.

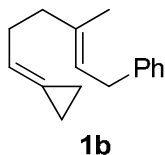

**(E)-(6-cyclopropylidene-3-methylhex-2-enyl)benzene (1b)**: Prepared using the same general procedure as for (1a) from (E)-4-methyl-6-phenylhex-4-enal.<sup>9</sup> Purified by silica gel chromatography (Hexanes). 34% <sup>1</sup>H-NMR (600 MHz, CD<sub>2</sub>Cl<sub>2</sub>) δ 7.27-7.24 (m, 2H),

<sup>8</sup> Sokol, J. G.; Korapala, C. S.; White, P. S.; Becker, J. J.; Gagné, M. R. *Angew. Chem. Int. Ed.* **2011**, *50*, 5658.

<sup>9</sup> Zhao, J-F.; Loh, T-P. *Angew. Chem. Int. Ed.* **2009**, *48*, 7232.

7.17-7.14 (m, 3H), 5.75-5.73 (m, 1H), 5.36-5.32 (m, 1H), 3.35 (d,  $J = 7.8$  Hz, 1H), 2.34-2.30 (m, 2H), 2.19-2.17 (m, 2H), 1.73 (s, 3H), 1.00 (s, 4H);  $^{13}\text{C-NMR}$  (150 MHz,  $\text{CD}_2\text{Cl}_2$ )  $\delta$  142.5, 136.6, 128.8, 126.1, 123.7, 121.7, 118.4, 39.9, 34.7, 30.9, 16.4, 2.5, 2.2. HRMS (EI+) calculated for  $\text{C}_{16}\text{H}_{20}$  212.15650, found 212.15613.

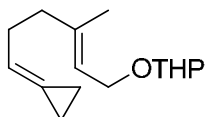**1g**

**(E)-2-(6-cyclopropylidene-3-methylhex-2-enyloxy)tetrahydro-2H-pyran (1g):**

Prepared using the same general procedure as for (1a) from (E)-4-methyl-6-(tetrahydro-2H-pyran-2-yloxy)hex-4-enal.<sup>10</sup> Purified by silica gel chromatography (10:1

Hexanes:Et<sub>2</sub>O). 45%  $^1\text{H-NMR}$  (600 MHz,  $\text{CDCl}_3$ )  $\delta$  5.75-5.72 (m, 1H), 5.39-5.36 (m, 1H), 4.62-4.61 (m, 1H), 4.23 (dd,  $J = 11.9$  Hz, 6.4 Hz, 1H), 4.02 (dd,  $J = 11.9$  Hz, 7.4 Hz, 1H), 3.91-3.87 (m, 1H), 3.52-3.49 (m, 1H), 2.33-2.29 (m, 2H), 2.18-2.16 (m, 3H), 1.86-1.81 (m, 1H), 1.74-1.69 (m, 1H), 1.69 (s, 3H), 1.60-1.56 (m, 3H), 1.55-1.51 (m, 2H), 1.01 (bs, 4H);  $^{13}\text{C-NMR}$  (150 MHz,  $\text{CDCl}_3$ )  $\delta$  140.1, 121.3, 120.6, 117.6, 97.8, 63.6, 62.3, 39.2, 30.7, 30.1, 25.5, 19.6, 16.4, 2.2, 1.8.

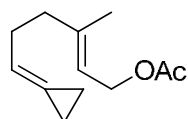**1h**

**(E)-6-cyclopropylidene-3-methylhex-2-enyl acetate (1h):** Prepared using the same general procedure as for (1a) from (E)-3-methyl-6-oxohex-2-enyl acetate.<sup>11</sup> Purified by an silica gel chromatography using 9:1 Hexanes:EtOAc in an initial column, followed by a second silica gel column utilizing 15:1 Hexanes:EtOAc as the eluant. 22%  $^1\text{H-NMR}$

<sup>10</sup> Koh, J. H.; Gagné, M. R. *Angew. Chem. Int. Ed.* **2004**, *43*, 3459.

<sup>11</sup> Surendra, K. Qiu, W.; Corey, E. J. *J. Am. Chem. Soc.* **2011**, *133*, 9724.

(600 MHz, CDCl<sub>3</sub>)  $\delta$  5.74-5.72 (m, 1H), 5.37-5.34 (m, 1H), 4.58 (d,  $J = 7.1$  Hz, 2H), 2.33-2.29 (m, 2H), 2.19-2.16 (m, 2H), 2.05 (s, 3H), 1.71 (s, 3H), 1.01 (bs, 4H); <sup>13</sup>C-NMR (150 MHz, CDCl<sub>3</sub>)  $\delta$  171.2, 142.2, 121.6, 118.3, 117.4, 61.4, 39.1, 30.0, 21.1, 16.5, 2.2, 1.8.

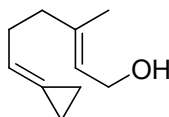**1i**

**(E)-6-cyclopropylidene-3-methylhex-2-en-1-ol (1i):** Prepared by removal of the tetrahydropyran protecting group from **1g**. To a small vial loaded with **1g** (0.250 g, 1.06 mmol, 1 eq.) was added MeOH (2.5 mL). *p*-Toluenesulfonic acid monohydrate was then added (0.010 g, 0.053 mmol, 5 mol%) and the reaction was stirred for 30 minutes at room temperature. The reaction mixture was then concentrated *in vacuo* and purified by silica gel chromatography (5:1 Hexanes:EtOAc) to give 0.1136 of the product compound. 71% <sup>1</sup>H-NMR (600 MHz, CDCl<sub>3</sub>)  $\delta$  5.75-5.72 (m, 1H), 5.44-5.41 (m, 1H), 4.15 (d,  $J = 6.9$  Hz, 2H), 2.32-2.29 (m, 2H), 2.17-2.15 (m, 2H), 1.69 (s, 3H), 1.21 (bs, 1H), 1.01 (bs, 4H); <sup>13</sup>C-NMR (150 MHz, CDCl<sub>3</sub>)  $\delta$  139.7, 123.4, 121.5, 117.5, 59.4, 39.1, 30.1, 16.2, 2.2, 1.81.

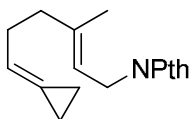**1j**

**(E)-2-(6-cyclopropylidene-3-methylhex-2-enyl)isoindoline-1,3-dione (1j):** Prepared by a Mitsunobu reaction of compound **1i**. To a small flask was added THF (4 mL), **1i** (0.050 g, 0.328 mmol, 1eq.), phthalimide (0.063 g, 0.426 mmol, 1.3 eq.), then triphenylphosphine (0.112 g, 0.426 mmol, 1.3 eq.). The reaction flask was then wrapped

in aluminum foil and diisopropyl azodicarboxylate (0.084 mL, 0.426 mmol, 1.3 eq.) was then added dropwise. The reaction was stirred for 4.5 h at room temperature before being poured into 16 mL H<sub>2</sub>O. The layers were separated and the aqueous layer was extracted twice each with Et<sub>2</sub>O and Hexanes. The combined organics were washed with two times with brine, dried over MgSO<sub>4</sub>, filtered and concentrated *in vacuo*. The product compound was purified by silica gel chromatography (10:1 Hexanes:Et<sub>2</sub>O) to give 0.0597 of product as a colorless oil which solidified upon placing in the freezer. 65% <sup>1</sup>H-NMR (600 MHz, CDCl<sub>3</sub>) δ 7.84-7.82 (m, 2H), 7.71-7.69 (m, 2H), 5.69-5.67 (m, 1H), 5.29-5.26 (m, 1H), 4.27 (d, *J* = 7.1 Hz, 2H), 2.29-2.25 (m, 2H), 2.13-2.11 (m, 2H), 1.83 (s, 3H), 0.97 (bs, 4H); <sup>13</sup>C-NMR (150 MHz, CDCl<sub>3</sub>) δ 168.1, 140.4, 133.8, 132.3, 123.1, 121.5, 118.0, 117.4, 39.0, 35.8, 30.0, 16.4, 2.2, 1.8.

Alkylidenecyclopropanes **1c**, **1d**, **1e**, and **1k** were prepared from aldehydes synthesized using a published ruthenium-catalyzed coupling procedure.<sup>12</sup>

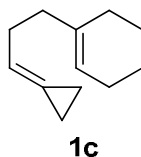

**(E)-(4-ethylhept-4-enylidene)cyclopropane (1c)**: Prepared using the same general procedure as for (**1a**). Purified by silica gel chromatography (Hexanes). 56% <sup>1</sup>H-NMR (600 MHz, CD<sub>2</sub>Cl<sub>2</sub>) δ 5.76-5.73 (m, 1H), 5.10 (t, *J* = 7.2 Hz, 1H), 2.26 (q, *J* = 7.7 Hz, 2H), 2.11 (t, *J* = 7.2 Hz, 2H), 2.04 (q, *J* = 7.6 Hz, 2H), 2.00 (m, 2H), 1.01 (bs, 4H), 0.96 (t, *J* = 7.6 Hz, 3H), 0.93 (t, *J* = 7.7 Hz, 3H); <sup>13</sup>C-NMR (150 MHz, CD<sub>2</sub>Cl<sub>2</sub>) δ 140.7,

<sup>12</sup> Dérien, S.; Jan, D.; Dixneuf, P. H. *Tetrahedron* **1996**, 52, 5511.

126.6, 121.4, 118.6, 36.7, 31.2, 23.5, 21.3, 15.1, 13.7, 2.5, 2.2. HRMS (EI+) calculated for C<sub>12</sub>H<sub>20</sub> 164.15650, found 164.15546.

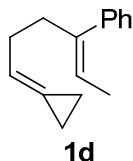

**(Z)-(6-cyclopropylidenehex-2-en-3-yl)benzene (1d):** Prepared using the same general procedure as for (1a). Purified by silica gel chromatography (Hexanes). 25% <sup>1</sup>H-NMR (600 MHz, CD<sub>2</sub>Cl<sub>2</sub>) δ 7.35-7.33 (m, 2H), 7.25-7.23 (m, 1H), 7.17-7.15 (m, 1H), 5.74-5.71 (m, 1H), 5.60-5.56 (m, 1H), 2.49 (t, *J* = 7.8 Hz, 2H), 2.22 (q, *J* = 7.8 Hz, 2H), 1.60 (d, *J* = 7.2 Hz, 3H), 1.01-0.95 (m, 4H); <sup>13</sup>C-NMR (150 MHz, CD<sub>2</sub>Cl<sub>2</sub>) δ 142.0, 141.6, 129.1, 128.5, 126.9, 121.8, 121.7, 118.2, 39.4, 31.2, 15.0, 2.5, 2.2. HRMS (EI+) calculated for C<sub>15</sub>H<sub>18</sub> 198.14085, found 198.13973.

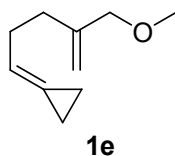

**(4-(methoxymethyl)pent-4-enylidene)cyclopropane (1e):** Prepared using the same general procedure as for (1a). Purified by silica gel chromatography (5:1 Pentanes:Et<sub>2</sub>O). 31% <sup>1</sup>H-NMR (600 MHz, CD<sub>2</sub>Cl<sub>2</sub>) δ 5.76-5.74 (m, 1H), 4.97 (s, 1H), 4.89 (s, 1H), 3.83 (s, 2H), 3.27 (s, 3H), 2.35-2.31 (m, 2H), 2.17 (t, *J* = 7.8 Hz, 2H), 1.01 (bs, 4H); <sup>13</sup>C-NMR (150 MHz, CD<sub>2</sub>Cl<sub>2</sub>) δ 146.7, 121.9, 118.1, 111.4, 75.9, 58.2, 33.2, 30.5, 2.5, 2.2. HRMS (EI+) calculated for C<sub>10</sub>H<sub>15</sub>O ([M<sup>+</sup> - H<sup>+</sup>]) 151.11230, found 151.11278.

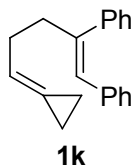

**(Z)-(5-cyclopropylidene-1-ene-1,2-diyl)dibenzene (1k)**: Prepared using the same general procedure as for **(1a)**. Purified by silica gel chromatography (Hexanes). 39% <sup>1</sup>H-NMR (600 MHz, CD<sub>2</sub>Cl<sub>2</sub>) δ 7.31-7.28 (m, 2H), 7.27-7.24 (m, 1H), 7.16-7.14 (m, 2H), 7.08-7.02 (m, 3H), 6.92-6.90 (m, 2H), 6.47 (s, 1H), 5.79 (tt, *J* = 6.6 Hz, 2.4 Hz, 1H), 2.64 (ddd, *J* = 9.0 Hz, 6.6 Hz, 1.2 Hz, 2H), 2.31-2.27 (m, 2H), 1.03-0.98 (m, 4H); <sup>13</sup>C-NMR (150 MHz, CD<sub>2</sub>Cl<sub>2</sub>) δ 143.7, 141.9, 138.2, 129.5, 129.2, 129.0, 128.3, 127.4, 126.9, 126.6, 122.1, 117.9, 40.8, 30.8, 2.5, 2.3. HRMS (EI+) calculated for C<sub>20</sub>H<sub>20</sub> 260.15650, found 260.15682.

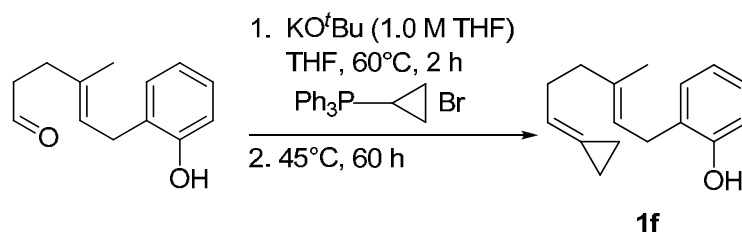

**(E)-2-(6-cyclopropylidene-3-methylhex-2-enyl)phenol (1f)**: The general procedure for the Wittig reaction did not work to synthesize **1f** as decomposition of the aldehyde was observed. Instead a procedure employing KO<sup>t</sup>Bu to activate the phosphonium salt was utilized.<sup>13</sup> To a Schlenk flask loaded with cyclopropyltriphenylphosphonium bromide (1.00 g, 2.61 mmol, 1.33 eq.) and THF (20 mL) under N<sub>2</sub> atmosphere was slowly added KO<sup>t</sup>Bu (1.0 M in THF, 5.22 mL, 5.22 mmol, 2.66 eq.) at rt. The reaction changed from yellow upon initial addition of the KO<sup>t</sup>Bu and was orange by the end of the addition. The reaction was then heated to 60°C for 2 h. The aldehyde, (E)-6-(2-hydroxyphenyl)-4-methylhex-4-enal,<sup>14</sup> dissolved in THF (2.5 mL), was then added and the reaction was heated at 45°C for 60 h. After allowing the reaction to cool to rt, H<sub>2</sub>O was added then

<sup>13</sup> Maercker, A.; Daub, V. E. E. *Tetrahedron*, **1994**, *50*, 2439.

<sup>14</sup> Koh, J. H.; Mascarenhas, C.; Gagné, M. R. *Tetrahedron*, **2004**, *60*, 7405.



saturated aqueous  $\text{NH}_4\text{Cl}$ . The layers were separated and the aqueous layer extracted with  $\text{Et}_2\text{O}$  (2x). The combined organic layers were washed with brine (1x), dried over  $\text{MgSO}_4$ , filtered, and concentrated *in vacuo*. The product compound was then purified by silica gel chromatography using 5:1 Pentanes: $\text{Et}_2\text{O}$ . Compound **1f** was obtained as a colorless oil (0.075g, 17%).  $^1\text{H-NMR}$  (600 MHz,  $\text{CD}_2\text{Cl}_2$ )  $\delta$  7.09-7.07 (m, 2H), 6.89 (dt,  $J = 7.8$  Hz, 1.2 Hz, 1H), 6.78-6.76 (m, 1H), 5.73-5.70 (m, 1H), 5.33-5.31 (m, 1H), 5.11-5.09 (m, 1H), 3.35 (d,  $J = 7.2$  Hz, 2H), 2.35-2.31 (m, 2H), 2.21-2.19 (m, 2H), 1.76 (s, 3H), 1.02-0.99 (m, 4H);  $^{13}\text{C-NMR}$  (150 MHz,  $\text{CD}_2\text{Cl}_2$ )  $\delta$  154.9, 138.6, 130.4, 127.9, 127.6, 122.3, 122.1, 121.1, 118.1, 116.0, 39.8, 30.7, 30.0, 16.4, 2.6, 2.2. HRMS (EI+) calculated for  $\text{C}_{16}\text{H}_{20}\text{O}$  228.15142, found 228.15209.

### C. General Procedure for Au(I) Catalyzed Cope Rearrangement

To a vial loaded with silver hexafluoroantimonate (3.2 mg, 0.0092 mmol, 0.2 eq.) would be added a 1:9  $\text{CH}_2\text{Cl}_2$ :1,2-DCE solution (1 mL). Au(I) catalyst **4** (2.6 mg, 0.0023 mmol, 0.05 eq.) was then added and the reaction stirred at rt for 15 min. The reaction was then placed into a NesLab Cryobath CB-80 maintained at  $-35^\circ\text{C}$  and stirred for 10 min before addition of **1a** (10 mg, 0.046 mmol, 1 eq.). The reaction would then be stirred for 18 h at  $-35^\circ\text{C}$  before concentrating the reaction *in vacuo*. The product was then isolated by a pipette column.

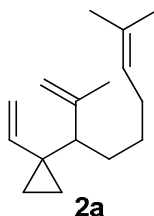

**1-(2,8-dimethylnona-1,7-dien-3-yl)-1-vinylcyclopropane (2a)**: Silica gel column (Hexanes). Product isolated as a colorless oil (9.4 mg, 94%).  $^1\text{H-NMR}$  (600 MHz,

$\text{CDCl}_3$ )  $\delta$  6.09 (dd,  $J = 15.6$  Hz, 10.5 Hz, 1H), 5.12-5.09 (m, 1H), 4.85-4.80 (m, 2H), 4.80 (bs, 1H), 4.66 (bs, 1H), 1.97-1.92 (m, 2H), 1.71 (s, 3H), 1.68 (s, 3H), 1.52-1.47 (m, 2H), 1.33-1.28 (m, 2H), 0.64-0.58 (m, 3H), 0.54-0.51 (m, 1H);  $^{13}\text{C-NMR}$  (150 MHz,  $\text{CDCl}_3$ )  $\delta$  147.1, 141.5, 131.5, 124.9, 111.3, 111.1, 52.7, 30.3, 28.4, 28.3, 25.9, 25.6, 22.2, 17.9, 14.6, 12.9. HRMS (EI+) calculated for  $\text{C}_{16}\text{H}_{26}$  218.20345, found 218.20224.

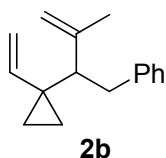

**(3-methyl-2-(1-vinylcyclopropyl)but-3-enyl)benzene (2b):** Silica gel column (Hexanes). Product isolated as a colorless oil (89%).  $^1\text{H-NMR}$  (600 MHz,  $\text{CDCl}_3$ )  $\delta$  7.25-7.23 (m, 2H), 7.17-7.14 (m, 3H), 6.13 (dd,  $J = 17.1$  Hz, 10.5 Hz, 1H), 4.94-4.88 (m, 2H), 4.82 (bs, 1H), 4.70 (bs, 1H), 2.90 (dd,  $J = 13.8$  Hz, 6.0 Hz, 1H), 2.85 (dd,  $J = 13.8$  Hz, 8.7 Hz, 1H) 1.92 (dd,  $J = 8.7$  Hz, 6.0 Hz, 1H), 1.76 (s, 3H), 0.66-0.64 (m, 2H), 0.60-0.58 (m, 1H), 0.33-0.30 (m, 1H);  $^{13}\text{C-NMR}$  (150 MHz,  $\text{CDCl}_3$ )  $\delta$  146.3, 141.6, 140.9, 129.1, 128.1, 125.7, 112.0, 111.8, 54.2, 37.3, 25.3, 23.3, 14.1, 13.9. HRMS (EI+) calculated for  $\text{C}_{16}\text{H}_{20}$  212.15650, found 212.15739.

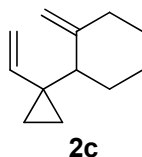

**1-(4-methylenehexan-3-yl)-1-vinylcyclopropane (2c):** Silica gel column (Hexanes). Product isolated as a colorless oil (87%).  $^1\text{H-NMR}$  (600 MHz,  $\text{CDCl}_3$ )  $\delta$  6.02 (dd,  $J = 16.8$  Hz, 10.8 Hz, 1H), 4.85-4.80 (m, 2H), 4.83 (bs, 1H), 4.70 (bs, 1H), 2.10-2.03 (m, 1H), 2.02-1.95 (m, 1H), 1.59-1.50 (m, 3H), 1.01 (t,  $J = 7.8$  Hz, 3H), 0.86 (t,  $J = 7.2$  Hz,

3H), 0.61-0.57 (m, 3H), 0.51-0.48 (m, 1H);  $^{13}\text{C-NMR}$  (150 MHz,  $\text{CDCl}_3$ )  $\delta$  151.9, 141.9, 110.0, 108.3, 53.0, 28.7, 25.4, 24.1, 14.4, 12.8, 12.6, 12.3.

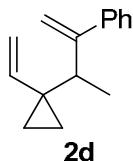

**(3-(1-vinylcyclopropyl)but-1-en-2-yl)benzene (2d):** Silica gel column (Hexanes).

Product isolated as a colorless oil (90%).  $^1\text{H-NMR}$  (600 MHz,  $\text{CDCl}_3$ )  $\delta$  7.31-7.29 (m, 4H), 7.27-7.25 (m, 1H), 6.00 (dd,  $J = 17.1$  Hz, 10.8 Hz), 5.21 (bs, 1H), 5.11 (bs, 1H), 4.90 (d,  $J = 10.8$  Hz, 1H), 4.84 (d,  $J = 17.1$  Hz, 1H), 2.45 (q,  $J = 7.2$  Hz, 1H), 1.19 (d,  $J = 7.2$  Hz, 3H), 0.61-0.58 (m, 1H), 0.48-0.38 (m, 3H);  $^{13}\text{C-NMR}$  (150 MHz,  $\text{CDCl}_3$ )  $\delta$  152.1, 144.0, 141.1, 128.1, 127.1, 127.0, 113.0, 111.5, 43.4, 25.7, 17.3, 14.2, 13.5.

HRMS (EI+) calculated for  $\text{C}_{15}\text{H}_{18}$  198.14085, found 198.14154.

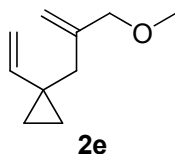

**1-(2-(methoxymethyl)allyl)-1-vinylcyclopropane (2e):** Silica gel column (10:1

Pentanes: $\text{Et}_2\text{O}$ ). Product isolated as a colorless oil (98%).  $^1\text{H-NMR}$  (600 MHz,  $\text{CDCl}_3$ )  $\delta$  5.62 (dd,  $J = 17.4$  Hz, 10.8 Hz, 1H), 5.07 (bs, 1H), 5.03 (bs, 1H), 4.89 (d,  $J = 17.4$  Hz, 1H), 4.86 (d,  $J = 10.8$  Hz, 1H), 3.86 (s, 2H), 3.30 (s, 3H), 2.20 (s, 2H), 0.68-0.63 (m, 4H);  $^{13}\text{C-NMR}$  (150 MHz,  $\text{CDCl}_3$ )  $\delta$  143.9, 143.6, 113.6, 110.8, 75.9, 57.9, 39.6, 20.3, 14.7.

HRMS (EI+) calculated for  $\text{C}_{10}\text{H}_{15}\text{O}$  ( $[\text{M}^+ - \text{H}^+]$ ) 151.11230, found 151.11209.

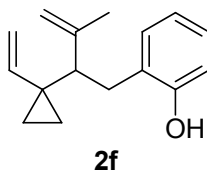

**2-(3-methyl-2-(1-vinylcyclopropyl)but-3-enyl)phenol (2f):** Silica gel column (10:1 Pentanes:Et<sub>2</sub>O). Product isolated as a colorless oil (71%). <sup>1</sup>H-NMR (600 MHz, CDCl<sub>3</sub>) δ 7.08-7.05 (m, 2H), 6.83 (td, *J* = 7.2 Hz, 1.2 Hz, 1H), 6.75-6.74 (m, 1H), 6.16 (dd, *J* = 17.1 Hz, 10.8 Hz, 1H), 4.96 (dd, *J* = 10.8 Hz, 1.8 Hz, 1H), 4.94 (dd, *J* = 17.1 Hz, 1.8 Hz, 1H), 2.88 (dd *J* = 14.4 Hz, 7.8 Hz, 1H), 2.85 (dd, *J* = 14.4 Hz, 7.2 Hz, 1H), 1.95 (pt, *J* = 7.8 Hz, 7.2 Hz, 1H), 1.80 (s, 3H), 0.67-0.59 (m, 3H), 0.33-0.30 (m, 1H); <sup>13</sup>C-NMR (150 MHz, CDCl<sub>3</sub>) δ 153.8, 147.2, 140.9, 131.0, 127.5, 127.3, 120.7, 115.5, 112.1, 111.7, 52.4, 31.8, 24.9, 23.6, 14.5, 13.5. HRMS (EI+) calculated for C<sub>16</sub>H<sub>20</sub>O 228.15142, found 228.15274.

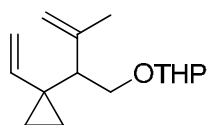**2g**

**2-(3-methyl-2-(1-vinylcyclopropyl)but-3-enyloxy)tetrahydro-2H-pyran (2g):** Silica gel column (10:1 Hexanes:Et<sub>2</sub>O). Product isolated as a colorless oil, in a 1:1 mixture of diastereomers (60%). <sup>1</sup>H-NMR (600 MHz, CDCl<sub>3</sub>) δ 6.01 (dd, *J* = 7.2 Hz, 6.5 Hz, 1H), 4.87-4.73 (m, 4H), 4.56 (bs, 1H), 3.95-3.91 (m, 1H), 3.85-3.83 (m, 1H), 3.54-3.47 (m, 2H), 1.86 (bs, 1H), 1.78 (bs, 4H), 1.55 (bs, 1H), 1.53-1.47 (m, 4H), 0.67-0.64 (m, 4H); <sup>13</sup>C-NMR (150 MHz, CDCl<sub>3</sub>) δ 145.0, 140.8, 111.7, 111.5, 99.3, 68.6, 62.2, 51.9, 30.9, 25.5, 23.4, 23.1, 19.5, 13.9, 13.4.

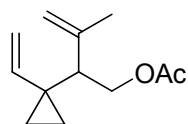**2h**

**3-methyl-2-(1-vinylcyclopropyl)but-3-enyl acetate (2h):** Silica gel column (10:1 Hexanes:Et<sub>2</sub>O). Product isolated as a colorless oil (70%). <sup>1</sup>H-NMR (600 MHz, CDCl<sub>3</sub>)

$\delta$  5.94 (dd  $J = 16.9$  Hz, 10.8 Hz, 1H), 4.90 (m, 2H), 4.87 (dd,  $J = 8.4$  Hz, 1.4 Hz, 1H), 4.73 (bs, 1H), 4.26 (d,  $J = 7.2$  Hz, 2H), 2.03 (s, 3H), 1.94 (t,  $J = 7.2$  Hz, 1H), 1.79 (s, 3H), 0.72-0.65 (m, 3H), 0.63-0.60 (m, 1H);  $^{13}\text{C-NMR}$  (150 MHz,  $\text{CDCl}_3$ )  $\delta$  171.1, 143.7, 139.8, 112.3, 112.0, 64.8, 50.6, 23.0, 21.0, 13.6, 13.1.

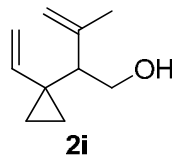

**3-methyl-2-(1-vinylcyclopropyl)but-3-en-1-ol (2i):** Silica gel column (10:1

Hexanes:EtOAc). Product isolated as a colorless oil (35%).  $^1\text{H-NMR}$  (600 MHz,  $\text{CDCl}_3$ )  $\delta$  5.97 (dd,  $J = 17.4$  Hz, 10.3 Hz, 1H), 4.98 (bs, 1H), 4.90 (pd,  $J = 1.8$  Hz, 1H), 4.87 (pd,  $J = 2.9$  Hz, 1H), 4.80 (bs, 1H), 3.77-3.75 (m, 2H), 1.90 (t,  $J = 7.2$  Hz, 1H), 1.81 (s, 3H), 1.54 (bs, 1H), 0.73-0.70 (m, 1H), 0.67-0.62 (m, 2H), 0.61-0.58 (m, 1H);  $^{13}\text{C-NMR}$  (150 MHz,  $\text{CDCl}_3$ )  $\delta$  144.4, 140.4, 112.0, 112.0, 62.9, 54.1, 31.6, 23.1, 13.0, 12.9

**Conversion of 2i to 2h:** Dissolved alcohol **2i** (13 mg, 0.085 mmol, 1 eq.) in pyridine (0.12 mL) and cooled to 0°C. Added a single small crystal of 4-(dimethylamino)pyridine (DMAP) then acetic anhydride (0.0126 mL, 0.133 mmol, 1.5 eq.). The reaction was stirred briefly at 0° then allowed to warm to room temperature and stirred for 2 h. The reaction was then diluted with hexanes and quenched with ice/ $\text{H}_2\text{O}$ . The layers were separated and the aqueous layer was washed with hexanes (2x). The combined organic layers were then washed with 10% HCl (2x) and saturated  $\text{NaHCO}_3$  (2x) before drying over  $\text{MgSO}_4$ . The product was then concentrated *in vacuo* to give the product as a colorless oil (7.6 mg, 46%).  $^1\text{H}$  and  $^{13}\text{C}$  NMR spectra matched that of compound **2h**.

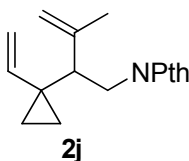

**2-(3-methyl-2-(1-vinylcyclopropyl)but-3-enyl)isoindoline-1,3-dione (2j):** Silica gel column (10:1 Hexanes:Et<sub>2</sub>O). Product isolated as a pale green oil, as an intractable mixture with **3j** (45%). **<sup>1</sup>H-NMR** (600 MHz, CDCl<sub>3</sub>) δ 7.84-7.81 (m, 2H), 7.71-7.69 (m, 2H), 6.08 (dd, *J* = 17.1 Hz, 10.5 Hz, 1H), 4.96 (dd, *J* = 17.1 Hz, 1.3 Hz, 1H), 4.93 (dd, *J* = 17.1 Hz, 1.3 Hz, 1H), 3.97 (dd, *J* = 13.8 Hz, 9.5 Hz, 1H), 3.79 (dd, *J* = 13.8 Hz, 6.1 Hz, 1H), 2.39 (dd, *J* = 9.5 Hz, 6.1 Hz, 1H), 1.78 (s, 3H), 0.71-0.68 (m, 1H), 0.67-0.62 (m, 3H); **<sup>13</sup>C-NMR** (150 MHz, CDCl<sub>3</sub>) δ 168.4, 144.0, 140.0, 133.8, 132.0, 123.1, 112.8, 112.3, 49.5, 39.3, 23.4, 22.5, 13.8, 12.3.

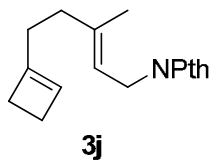

**(E)-2-(5-cyclobutenyl-3-methylpent-2-enyl)isoindoline-1,3-dione (3j):** Silica gel column (10:1 Hexanes:Et<sub>2</sub>O). Product isolated as a pale green oil, as an intractable mixture with **2j** (23%). **<sup>1</sup>H-NMR** (600 MHz, CDCl<sub>3</sub>) δ 7.84-7.81 (m, 2H), 7.71-7.69 (m, 2H), 5.62 (bs, 1H), 5.28 (t, *J* = 7.1 Hz, 1H), 4.27 (d, *J* = 7.1 Hz, 2H), 2.36 (bs, 2H), 2.26 (bs, 2H), 2.12-2.07 (m, 4H), 1.82 (s, 3H); **<sup>13</sup>C-NMR** (150 MHz, CDCl<sub>3</sub>) δ 168.1, 149.8, 140.4, 133.8, 132.3, 127.0, 123.1, 118.0, 36.6, 35.8, 31.1, 29.3, 26.5, 16.2.

#### D. Synthesis of control alkylidene substrates

Substrates prepared by Wittig reaction of phosphonium halide salt with (E)-4-methyl-6-phenylhex-4-enal.

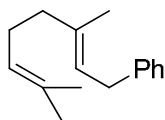

**(E)-(3,7-dimethylocta-2,6-dienyl)benzene:** Isopropyltriphenylphosphonium iodide (0.717 g, 1.66 mmol, 1.2 eq.) was suspended in dry THF (12 mL) and cooled to 0°C. *n*-BuLi (1.6 M, 1.04 mL, 1.66 mmol, 1.2 eq.) was added dropwise and the reaction was then stirred for 10 minutes at 0°C before adding the aldehyde (0.260 g, 1.38 mmol, 1 eq.) dissolved in THF (1 mL). The reaction was stirred 2h at 0°C before quenching at that temperature with saturated aqueous NH<sub>4</sub>Cl. Added H<sub>2</sub>O and Et<sub>2</sub>O and separated the layers. The aqueous layer was extracted 2 times with Et<sub>2</sub>O and the combined organics were then washed 2 times with brine before drying over MgSO<sub>4</sub>, filtering, and concentrating *in vacuo*. The product was then purified by silica gel chromatography (Hexanes) to give 0.130 g of the product as a colorless oil. 44% <sup>1</sup>H-NMR (600 MHz, CD<sub>2</sub>Cl<sub>2</sub>) δ 7.27-7.25 (m, 2H), 7.18-7.14 (m, 3H), 5.34 (t, *J* = 7.0 Hz, 1H), 5.13-5.10 (m, 1H), 3.35 (d, *J* = 7.4 Hz, 2H), 2.14-2.10 (m, 2H), 2.07-2.04 (m, 2H), 1.72 (s, 3H), 1.68 (s, 3H), 1.60 (s, 3H); <sup>13</sup>C-NMR (150 MHz, CD<sub>2</sub>Cl<sub>2</sub>) δ 142.3, 136.5, 131.7, 128.6, 128.6, 125.9, 124.6, 123.4, 40.0, 34.4, 26.9, 25.8, 17.7, 16.1.

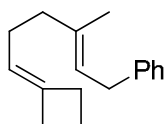

**(E)-(6-cyclobutylidene-3-methylhex-2-enyl)benzene:** Added cyclobutyltriphenylphosphonium bromide (0.505 g, 1.27 mmol, 1.2 eq.) to a small flask and suspended in THF (25 mL). Added PhLi (2.0M, 0.70 mL, 1.40 mmol, 1.3 eq.) slowly at room temperature. Stirred 2h at room temperature then added aldehyde (0.200 g, 1.06 mmol, 1 eq.) in THF (1 mL) to the dark red solution. The reaction turned green

with the formation of a precipitate and stirred for 3h. The reaction was then quenched with H<sub>2</sub>O and saturated aqueous NH<sub>4</sub>Cl. Et<sub>2</sub>O was added and the layers were separated before extracting the aqueous layer 2 times with Et<sub>2</sub>O. The combined organic layers were washed 2 times with brine before drying over MgSO<sub>4</sub>, filtering, and concentrating *in vacuo*. The product was then purified via silica gel chromatography (Hexanes) to give 0.154 g of the product as an intractable mixture with biphenyl. **<sup>1</sup>H-NMR** (600 MHz, CD<sub>2</sub>Cl<sub>2</sub>) δ 7.28-7.25 (m, 2H), 7.19-7.15 (m, 3H), 5.34-5.31 (m, 1H), 5.04-5.01 (m, 1H), 3.35 (d, *J* = 7.3 Hz, 2H), 2.64-2.60 (m, 4H), 2.07-2.04 (m, 2H), 2.02-1.99 (m, 2H), 1.91 (p, *J* = 7.9 Hz, 2H), 1.71 (s, 3H); **<sup>13</sup>C-NMR** (150 MHz, CD<sub>2</sub>Cl<sub>2</sub>) δ 142.3, 140.3, 136.5, 128.6, 128.6, 125.9, 123.4, 120.3, 40.0, 34.5, 31.2, 29.5, 26.8, 17.4, 16.1.

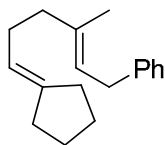

**(E)-(6-cyclopentylidene-3-methylhex-2-enyl)benzene:**

Cyclopentyltriphenylphosphonium bromide (0.522 g, 1.27 mmol, 1.2 eq.) was suspended in dry THF (12 mL) and cooled to 0°C. *n*-BuLi (1.6 M, 0.793 mL, 1.27 mmol, 1.2 eq.) was added dropwise and the reaction was then stirred for 30 minutes at 0°C before adding the aldehyde (0.200 g, 1.06 mmol, 1 eq.) dissolved in THF (1 mL). The reaction was stirred 1.5h at 0°C before quenching at that temperature with saturated aqueous NH<sub>4</sub>Cl. Added H<sub>2</sub>O and Et<sub>2</sub>O and separated the layers. The aqueous layer was extracted 2 times with Et<sub>2</sub>O and the combined organics were then washed 2 times with brine before drying over MgSO<sub>4</sub>, filtering, and concentrating *in vacuo*. The product was then purified by silica gel chromatography (Hexanes) to give 0.130 g of the product as a colorless oil. 51% **<sup>1</sup>H-NMR** (600 MHz, CD<sub>2</sub>Cl<sub>2</sub>) δ 7.27-7.25 (m, 2H), 7.19-7.14 (m, 3H), 5.33 (t, *J* =



7.3 Hz, 1H), 5.23 (bs, 1H), 3.35 (d,  $J = 7.4$ , 2H), 2.19 (dt,  $J = 19.7$  Hz, 7.2 Hz, 4H), 2.12-2.06 (m, 4H), 1.72 (s, 3H), 1.65 (p,  $J = 7.0$  Hz, 2H), 1.58 (p,  $J = 6.8$  Hz, 2H);  $^{13}\text{C-NMR}$  (150 MHz,  $\text{CD}_2\text{Cl}_2$ )  $\delta$  143.5, 142.3, 136.6, 128.6, 128.6, 125.9, 123.3, 120.0, 39.9, 34.5, 33.9, 28.8, 28.5, 26.8 26.7, 16.2.

**4. NMR Spectra.** It should be noted that n-hexane is an impurity in the NMR spectra of many of the Cope rearranged product. In most cases the trace amount of hexanes could not be removed even with repeated trituration with the deuterated NMR solvent. This impurity comes with a multiplet at  $\delta$  1.35-1.25 ppm and what appears to be a triplet at  $\delta$  0.90 ppm. The n-hexane signals are most easily seen and proven to be an impurity by the HSQC included with the spectra of **2b**.

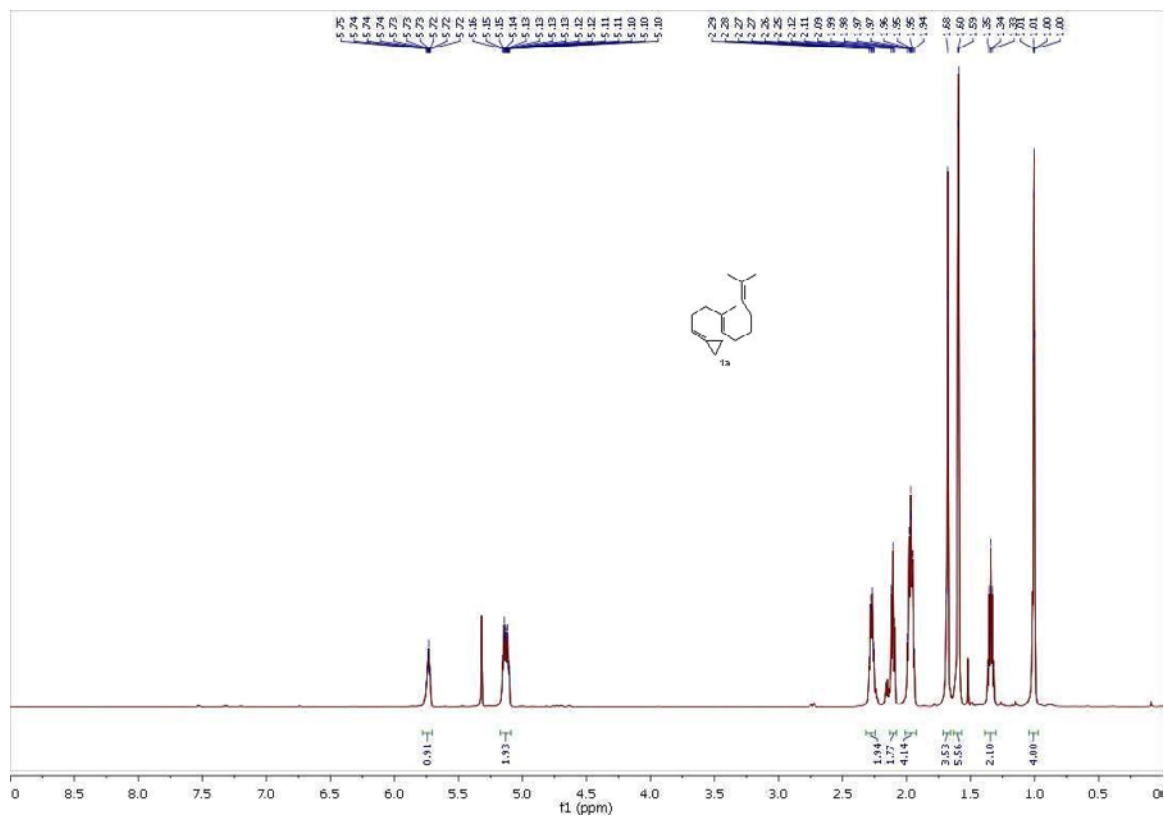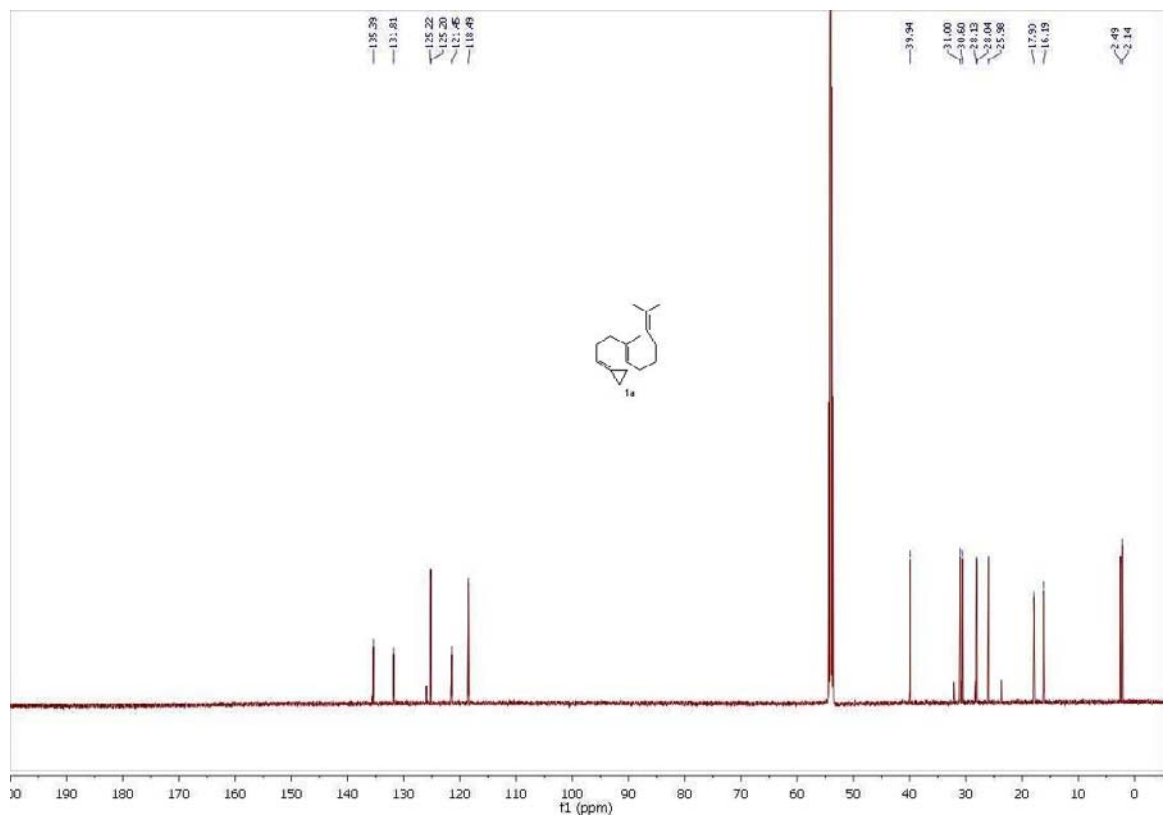

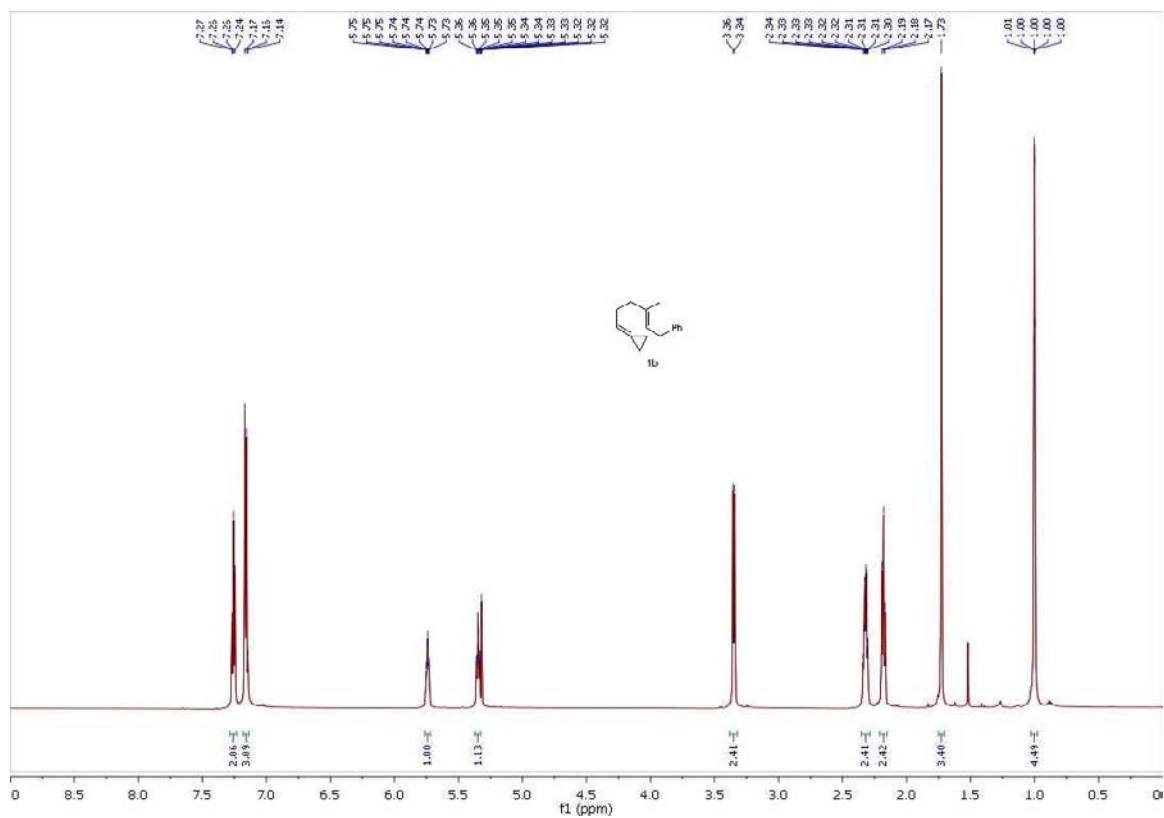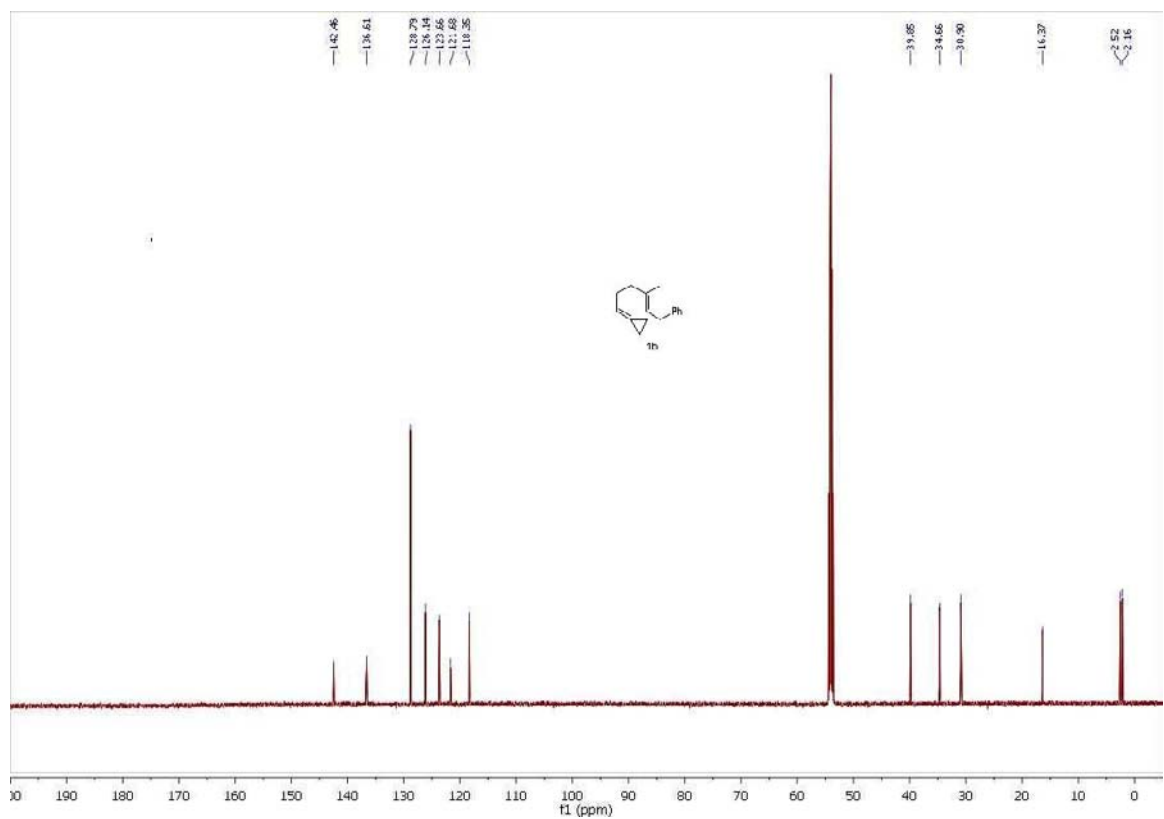

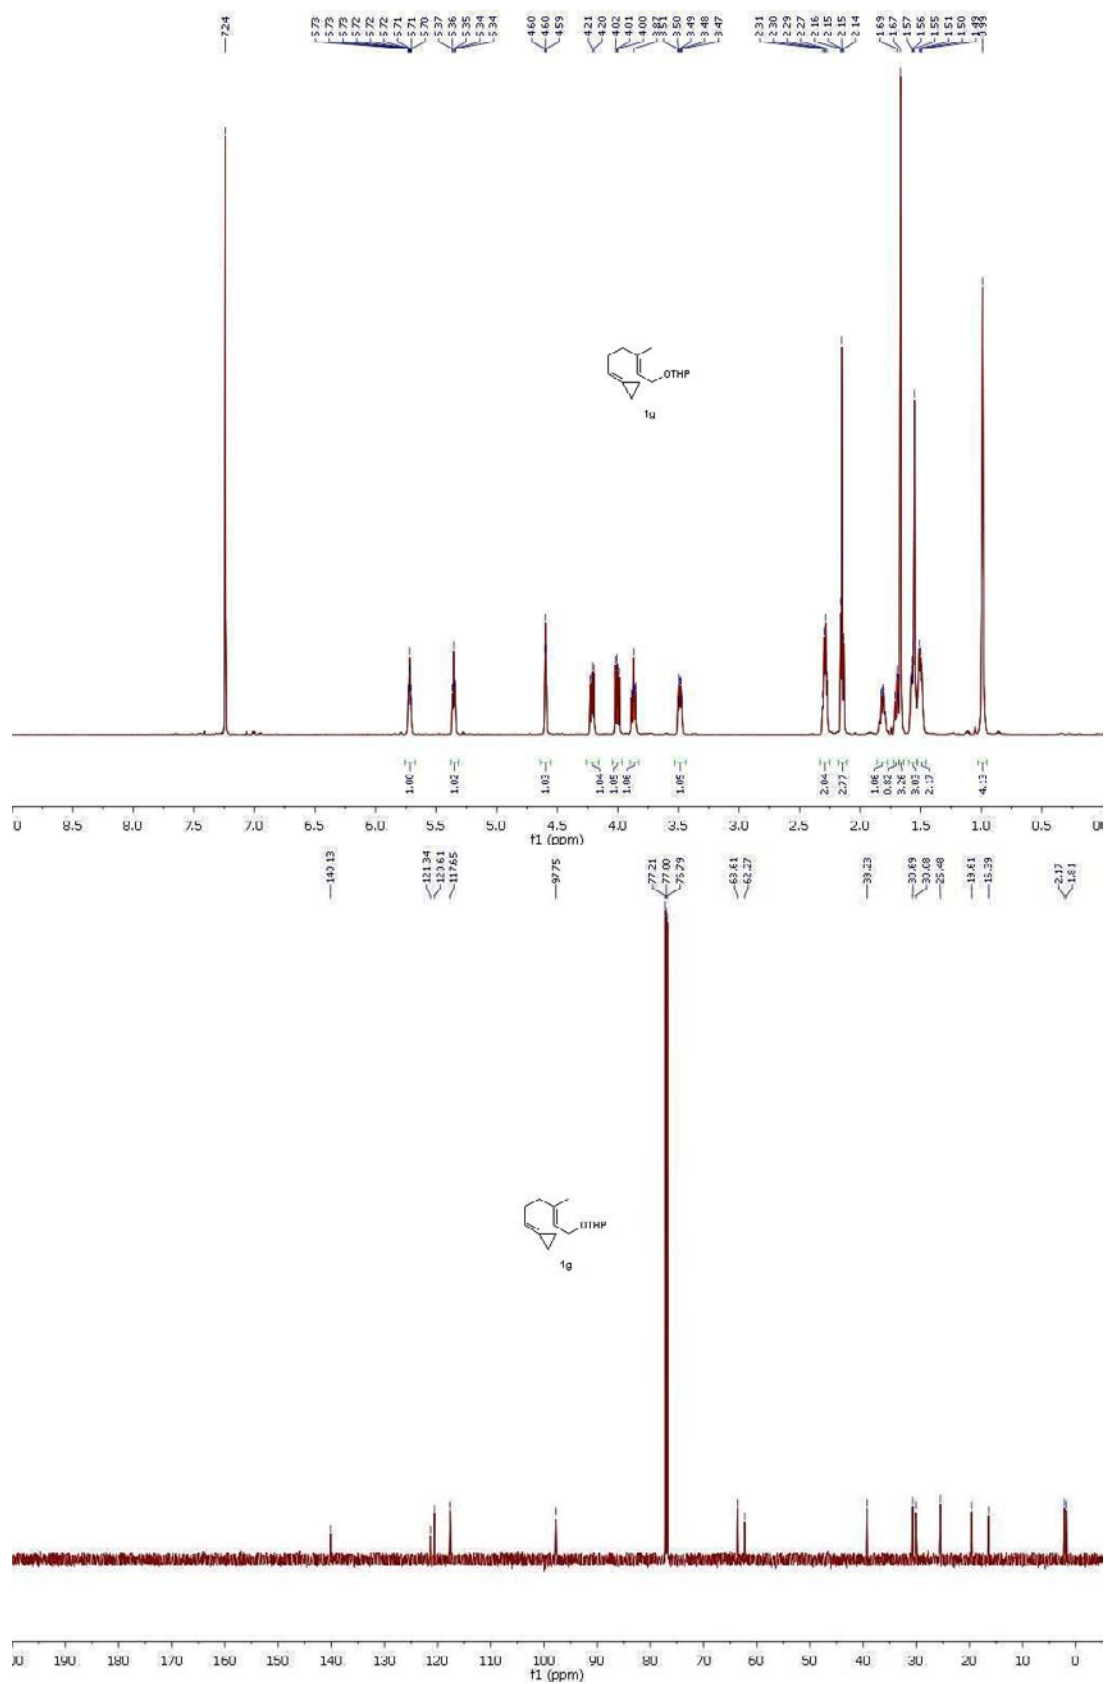

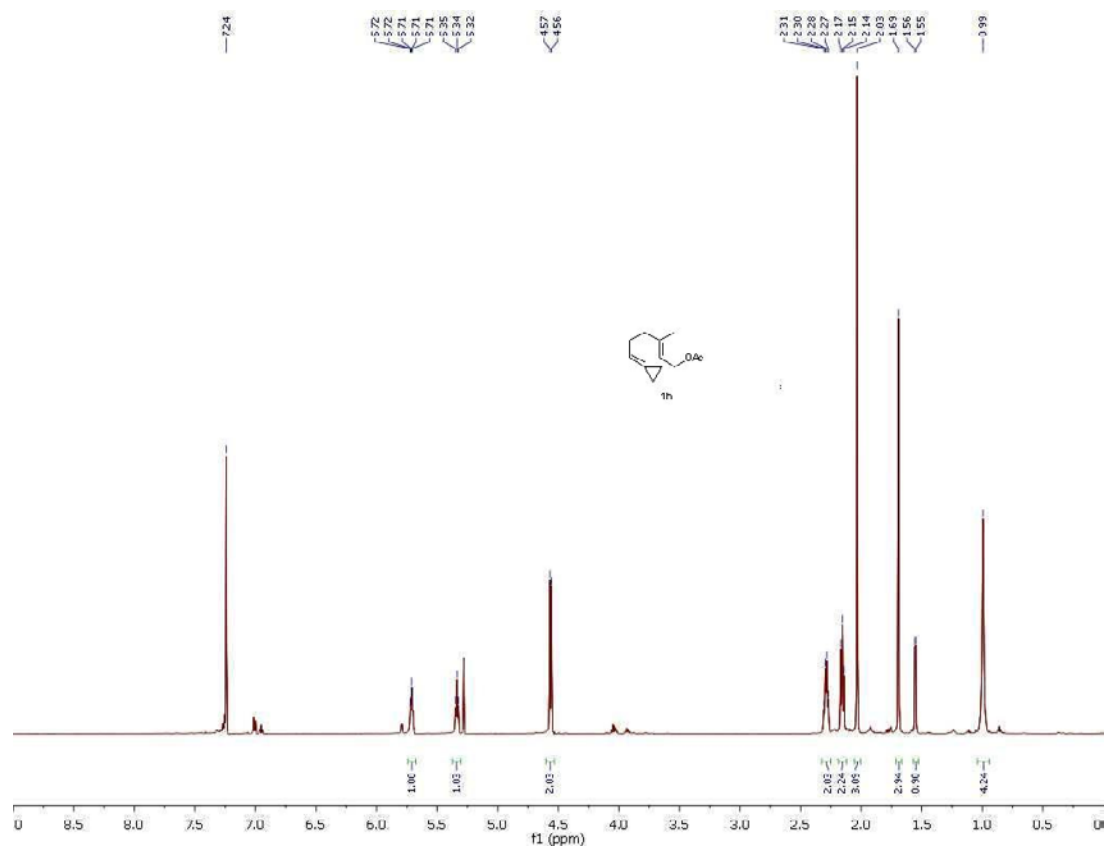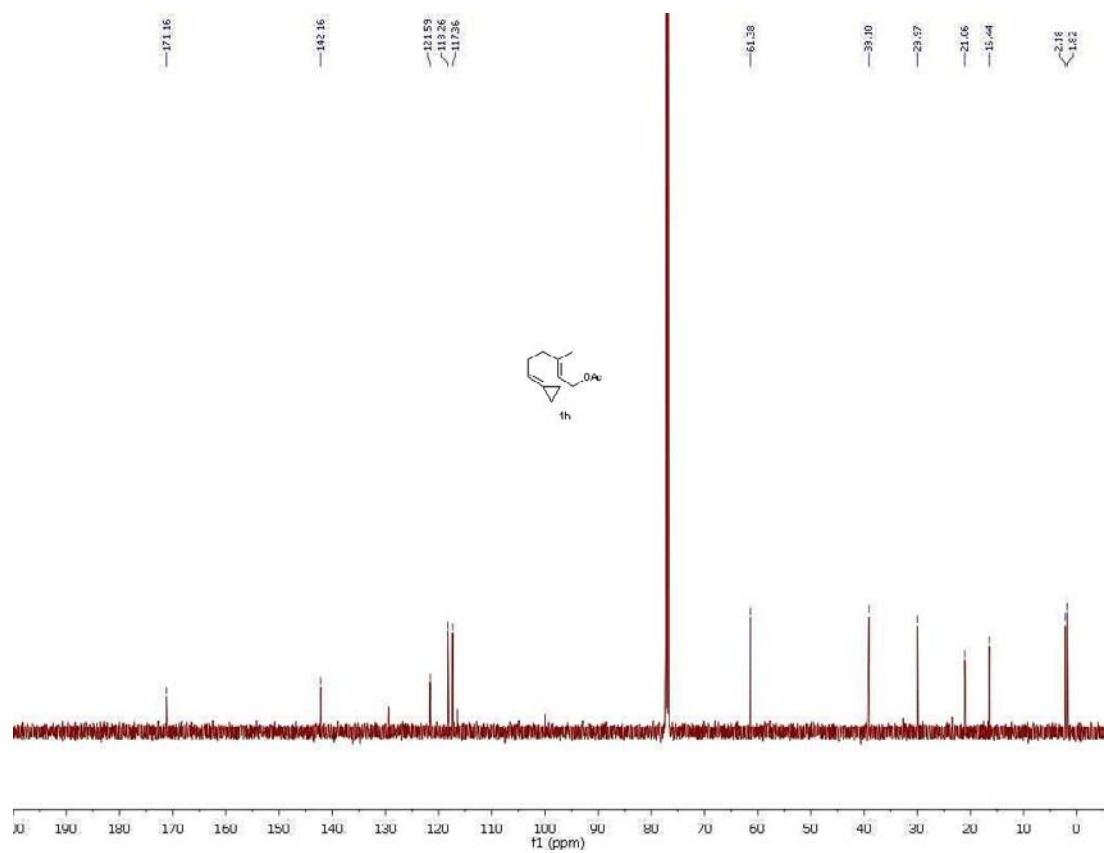

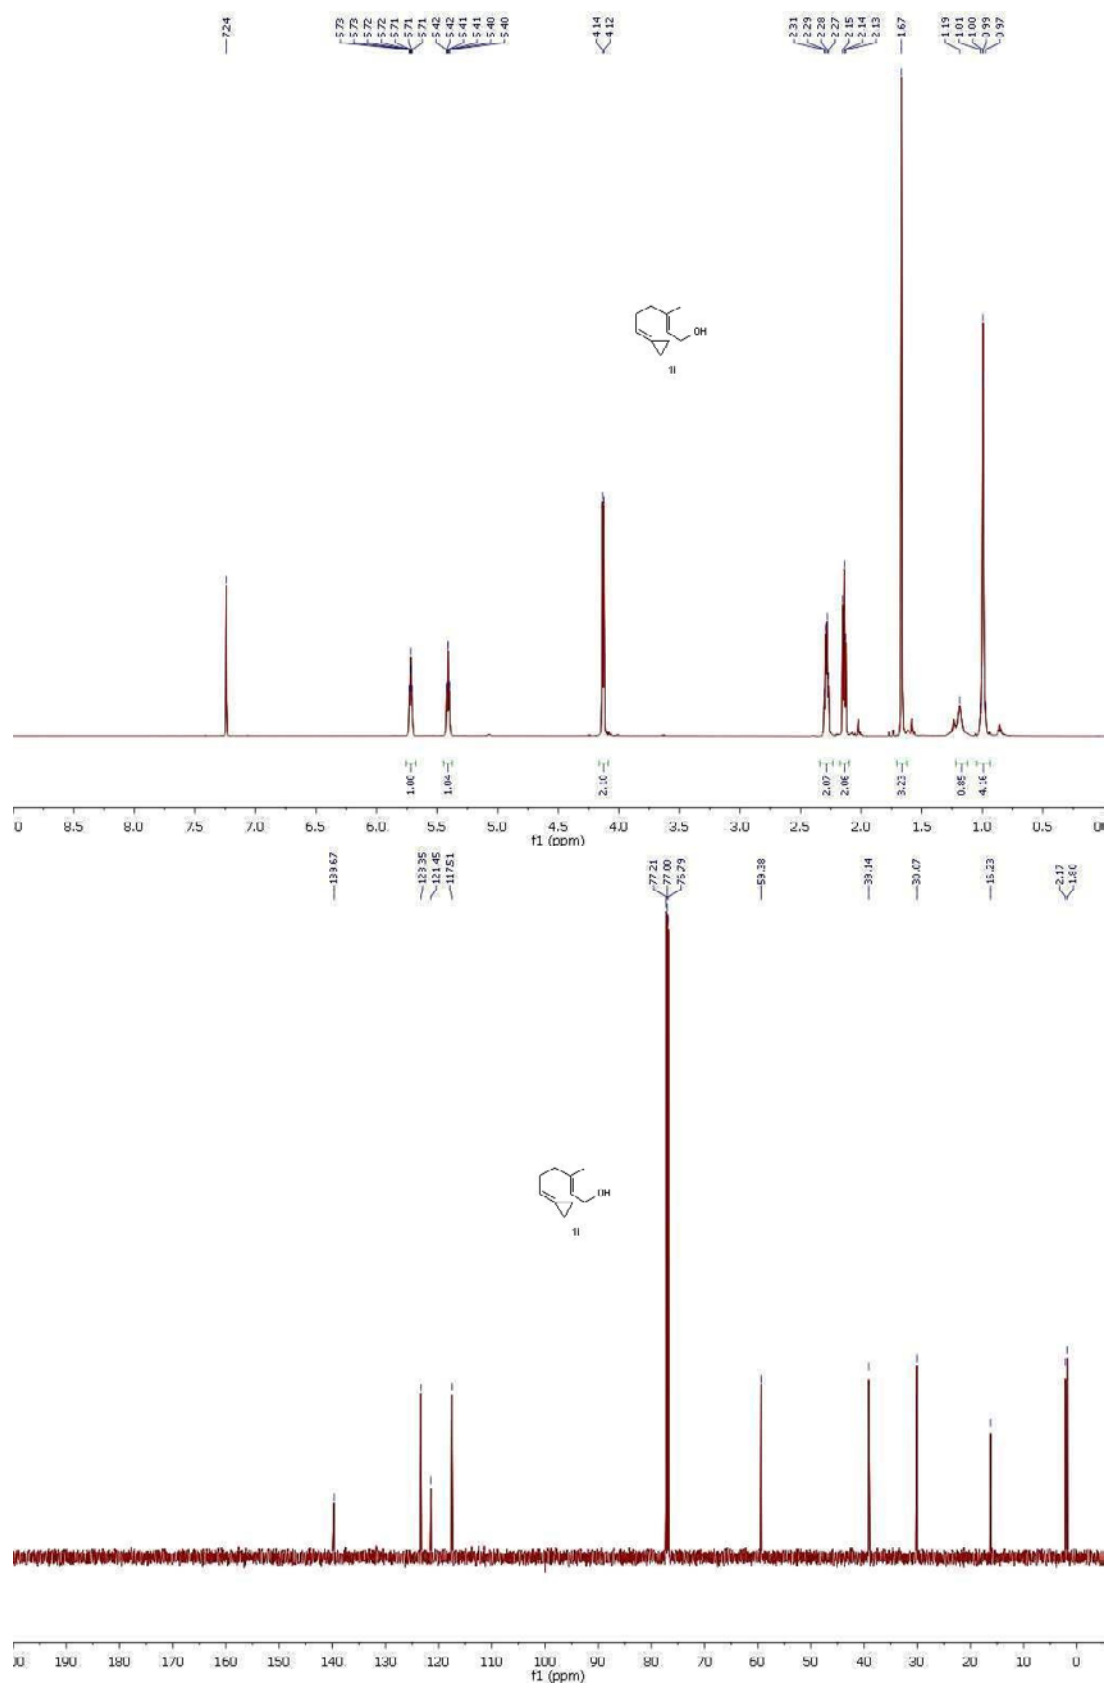

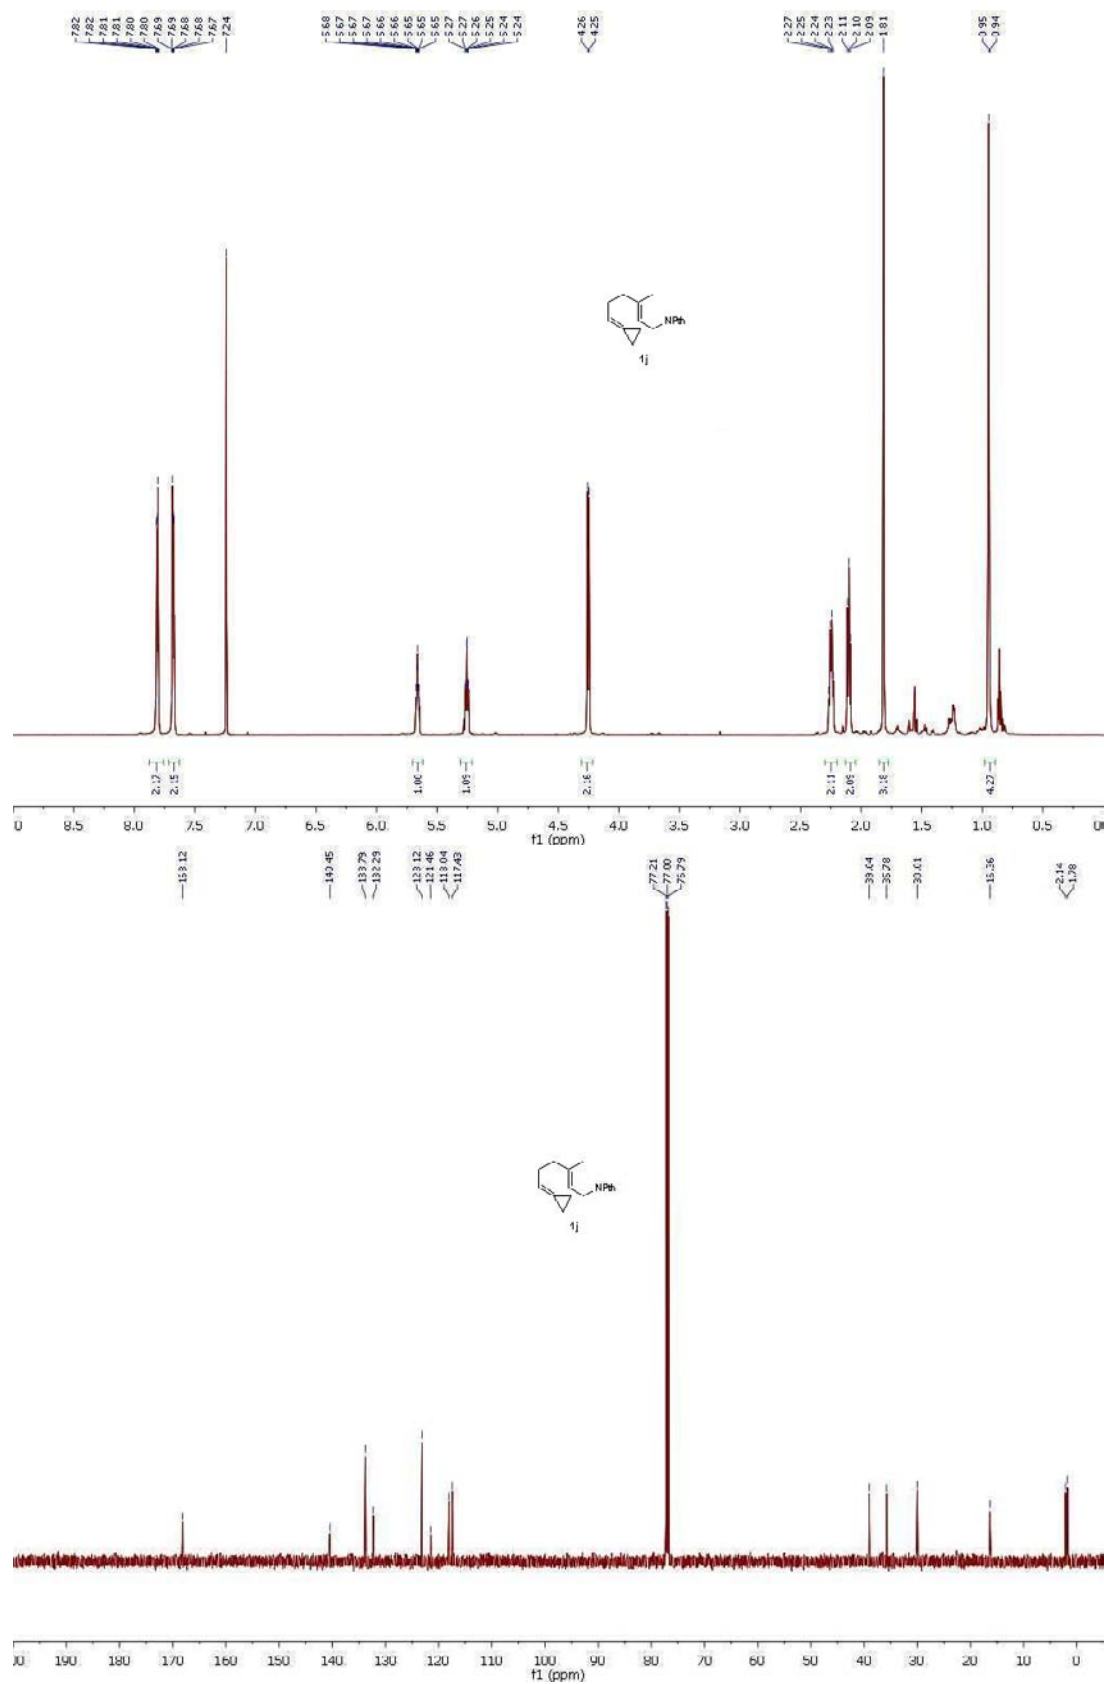

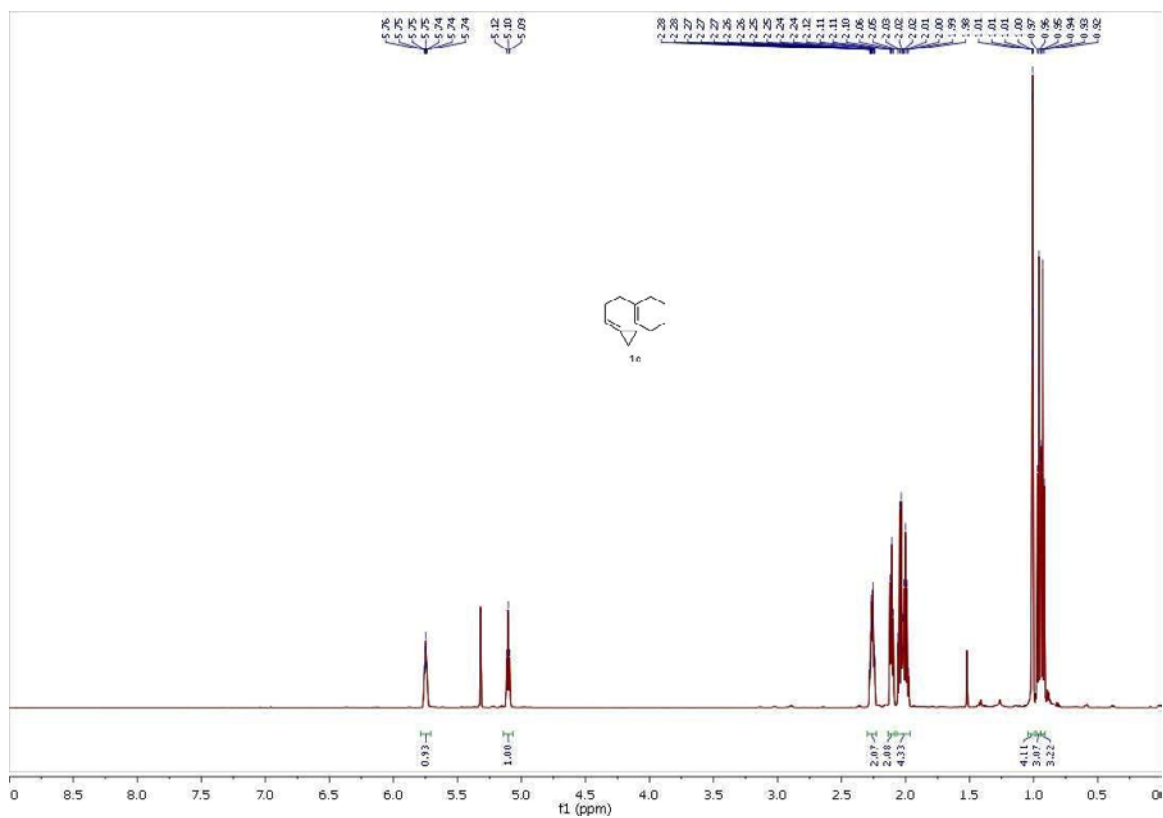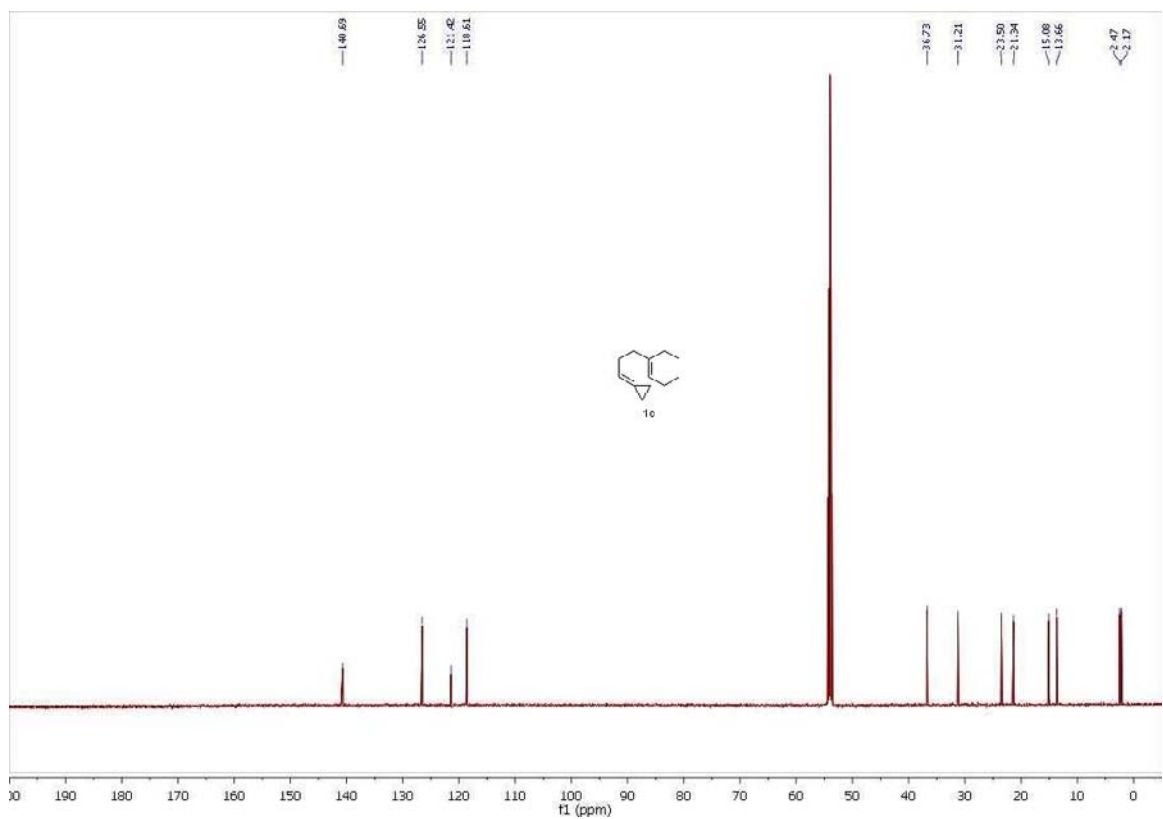



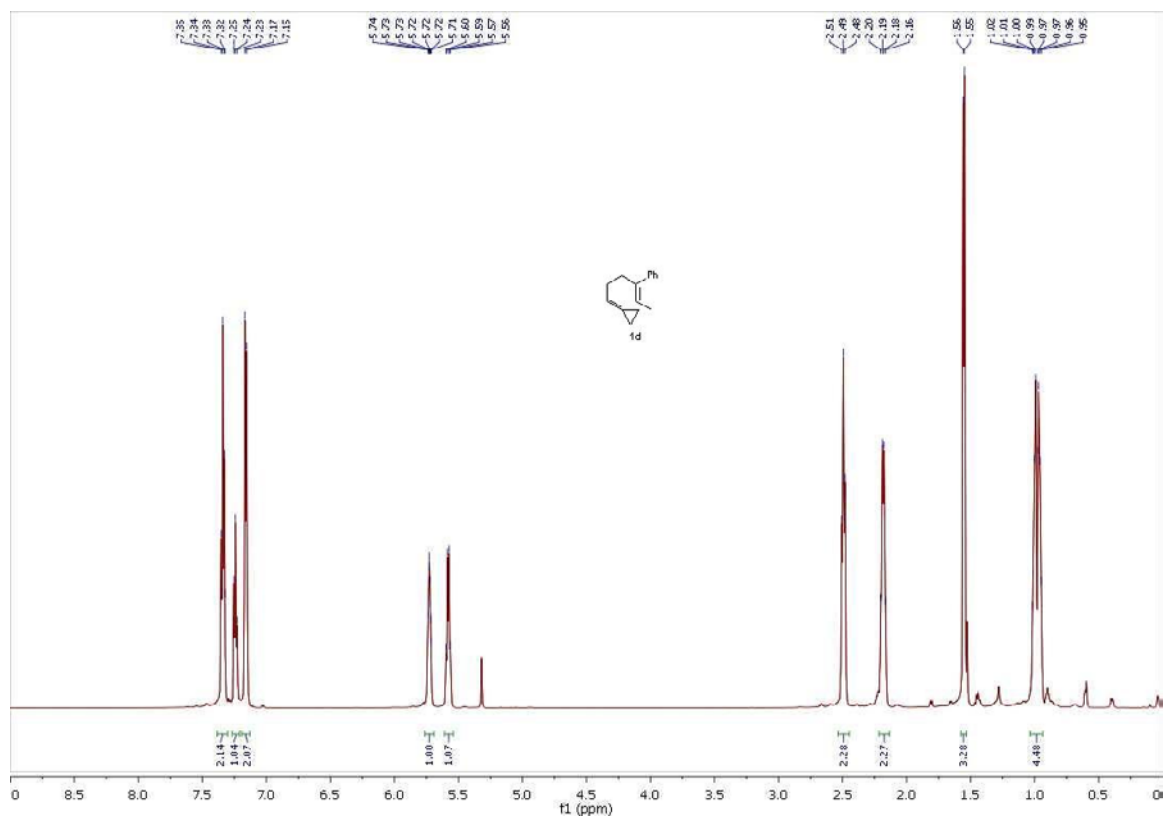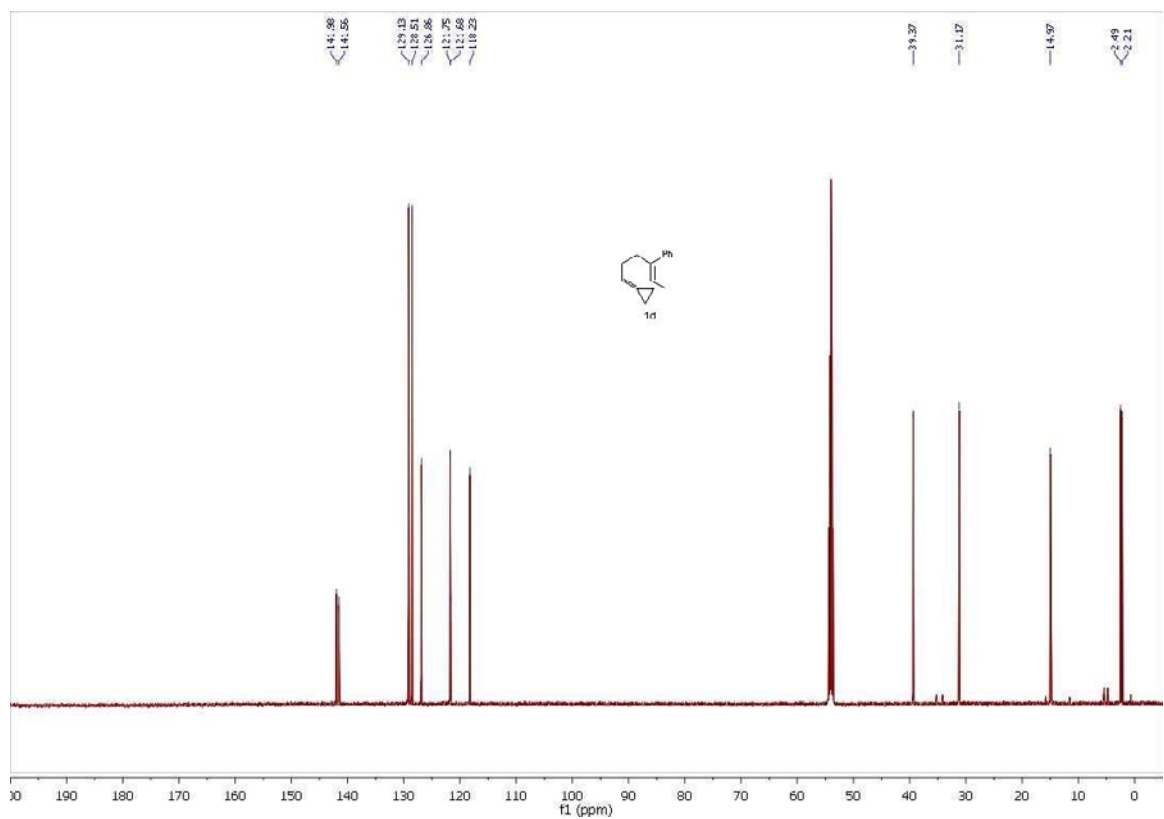

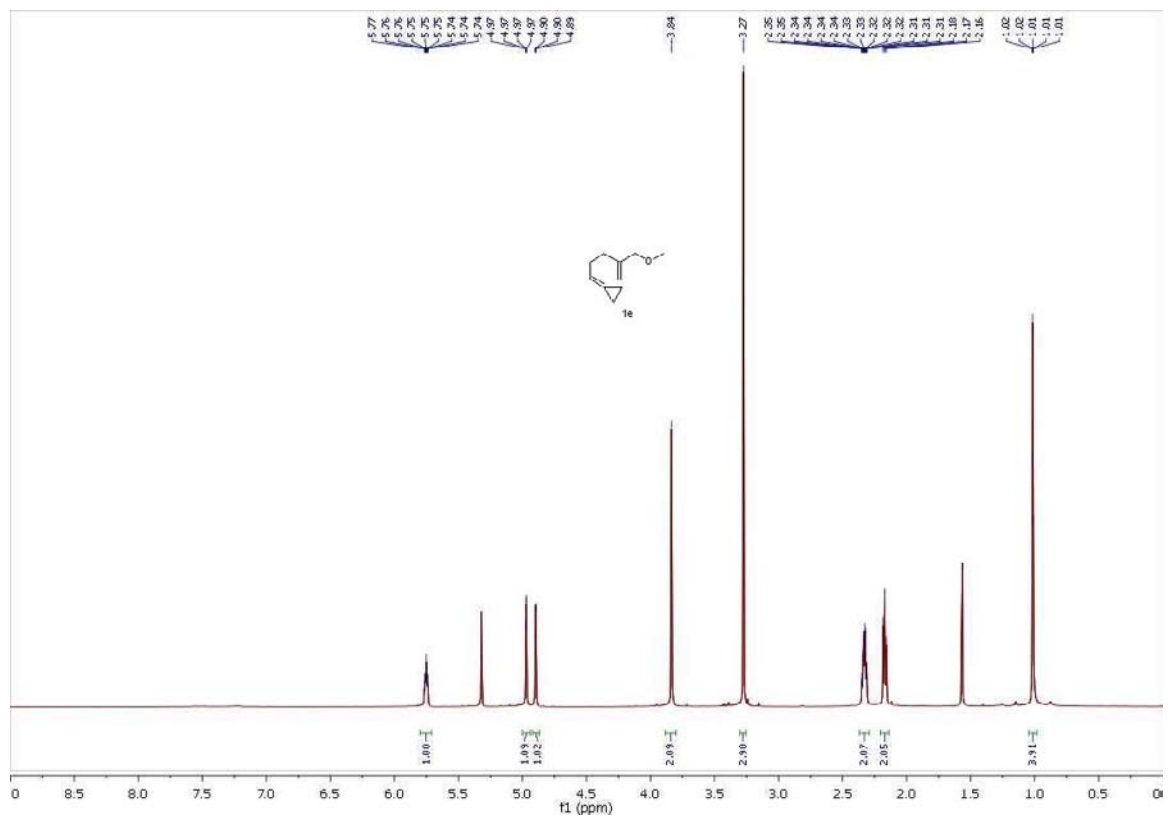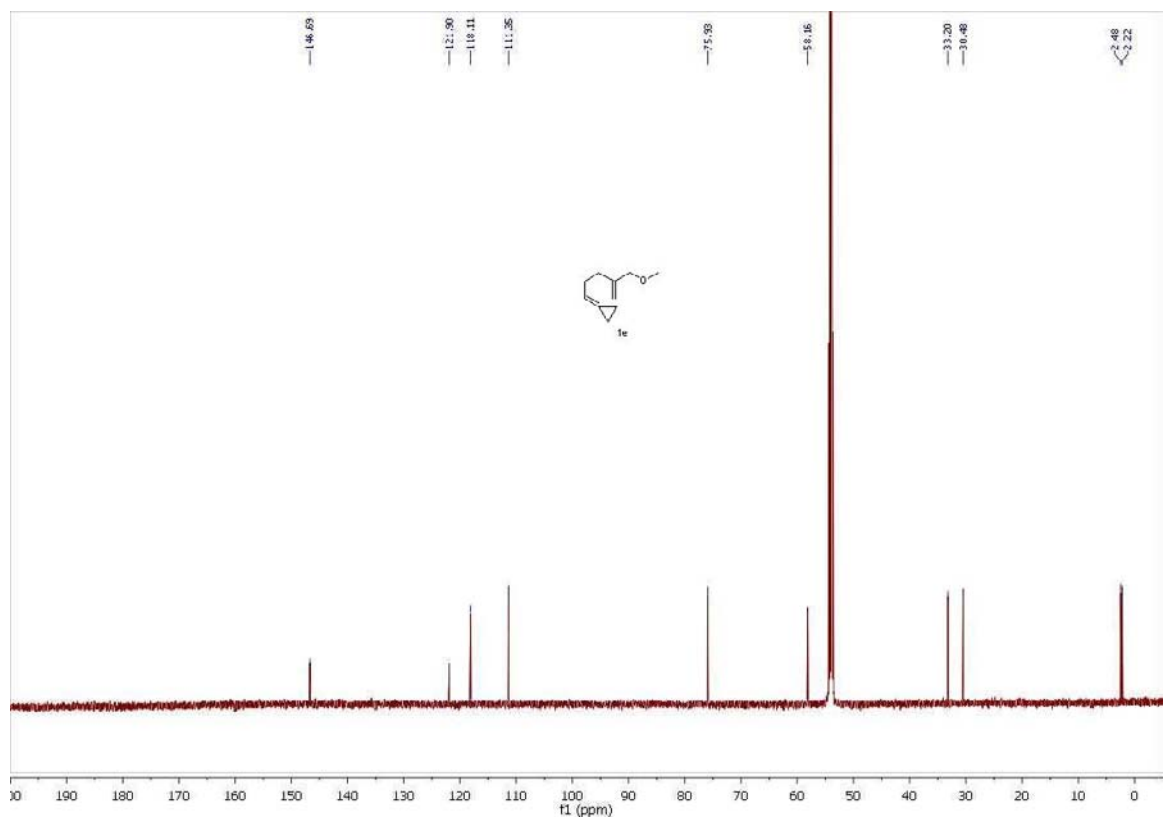





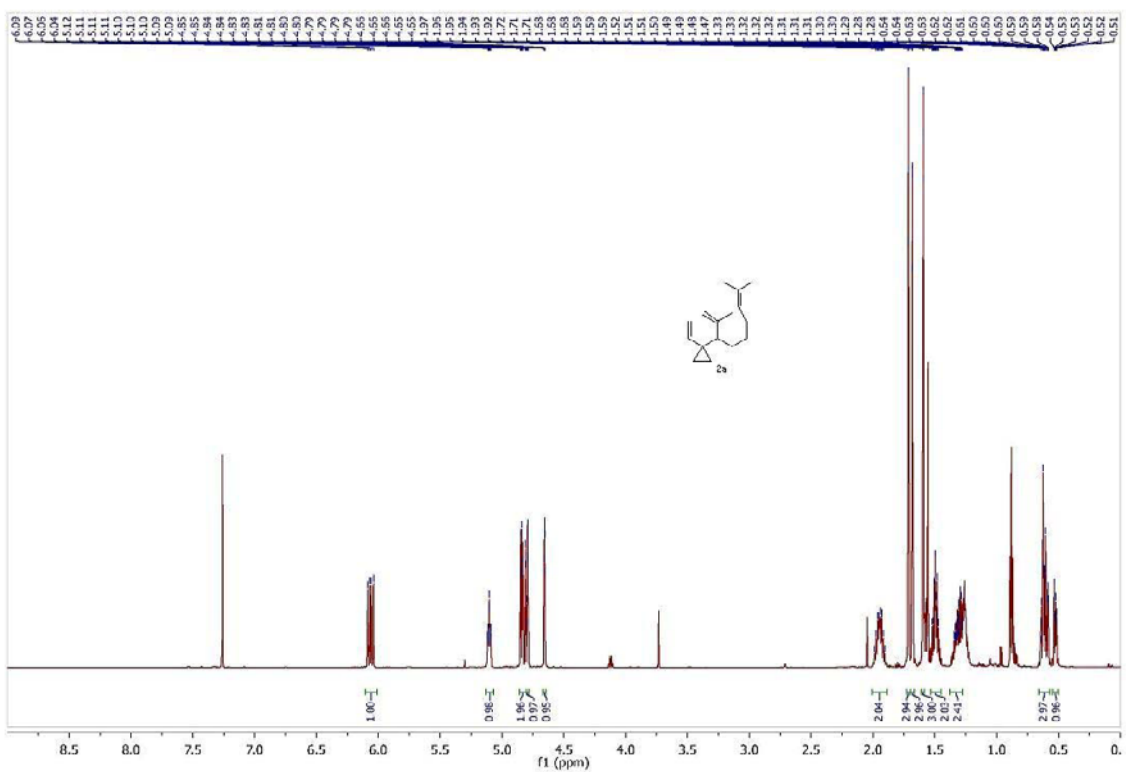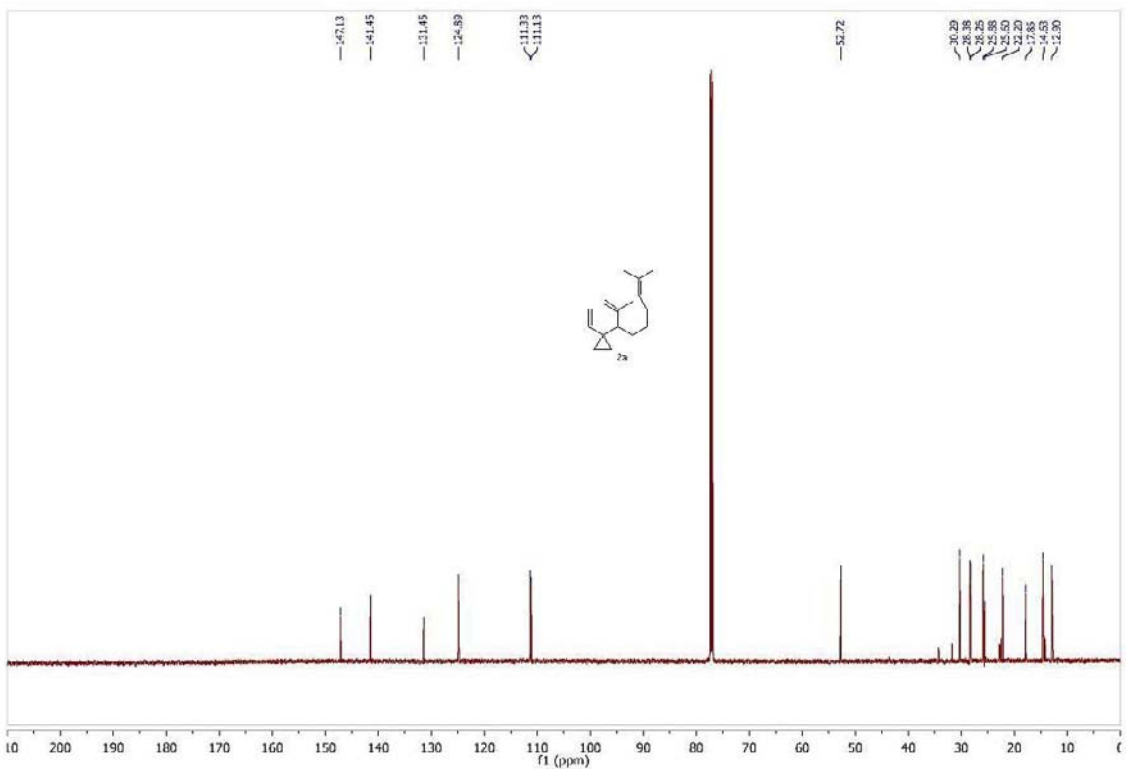

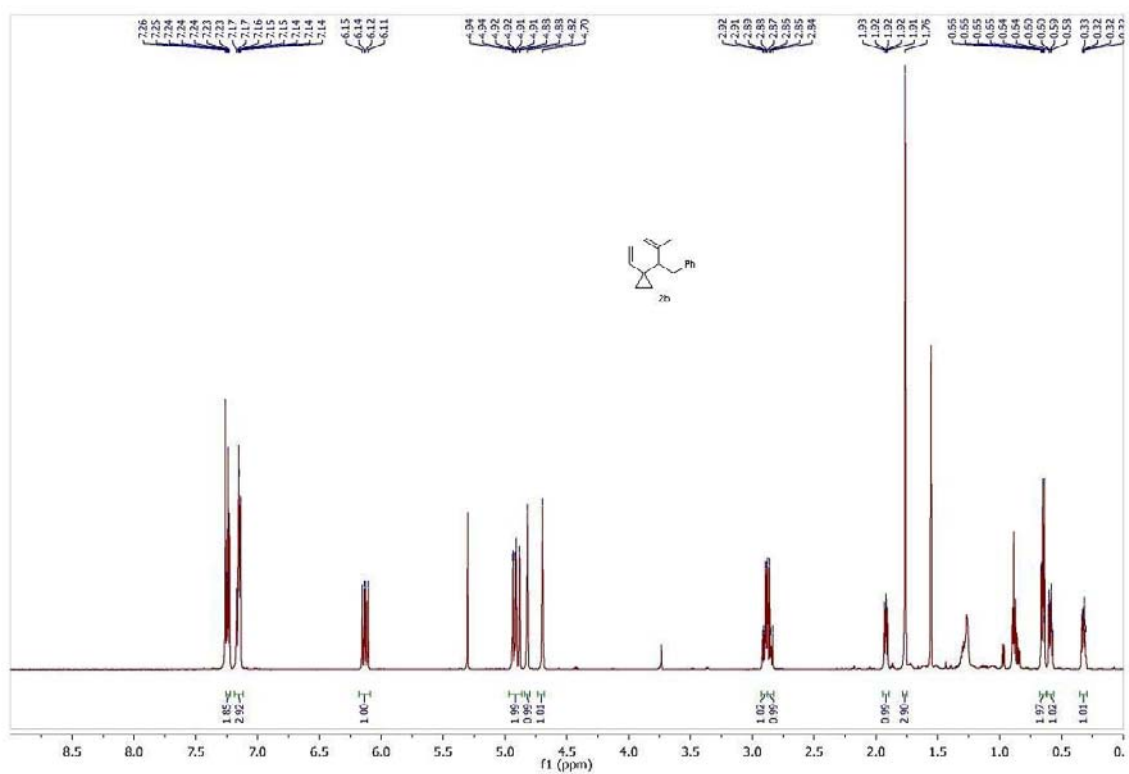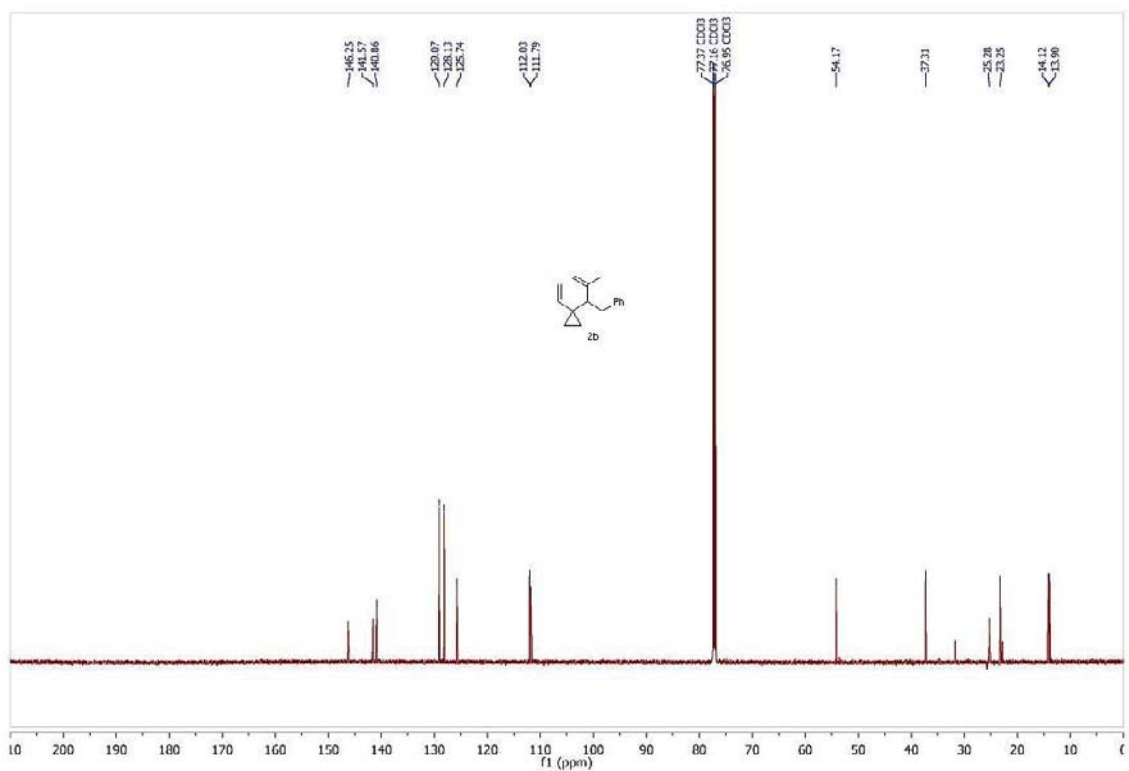

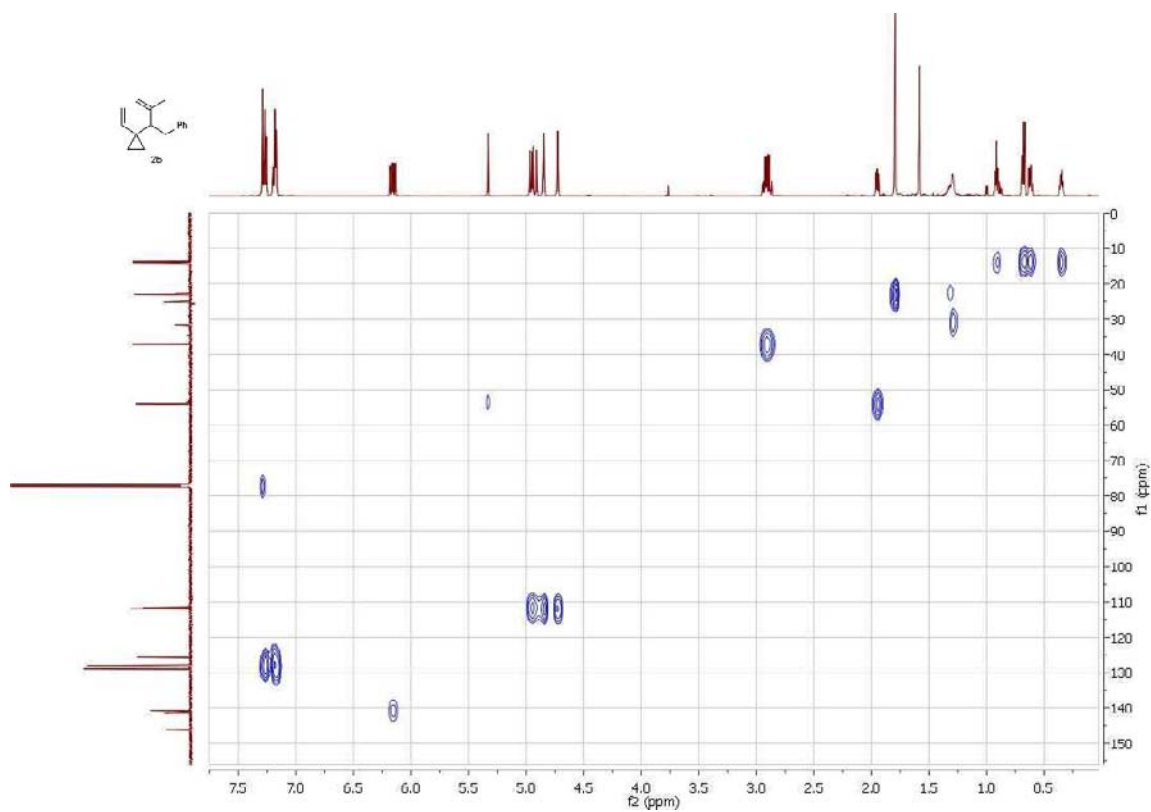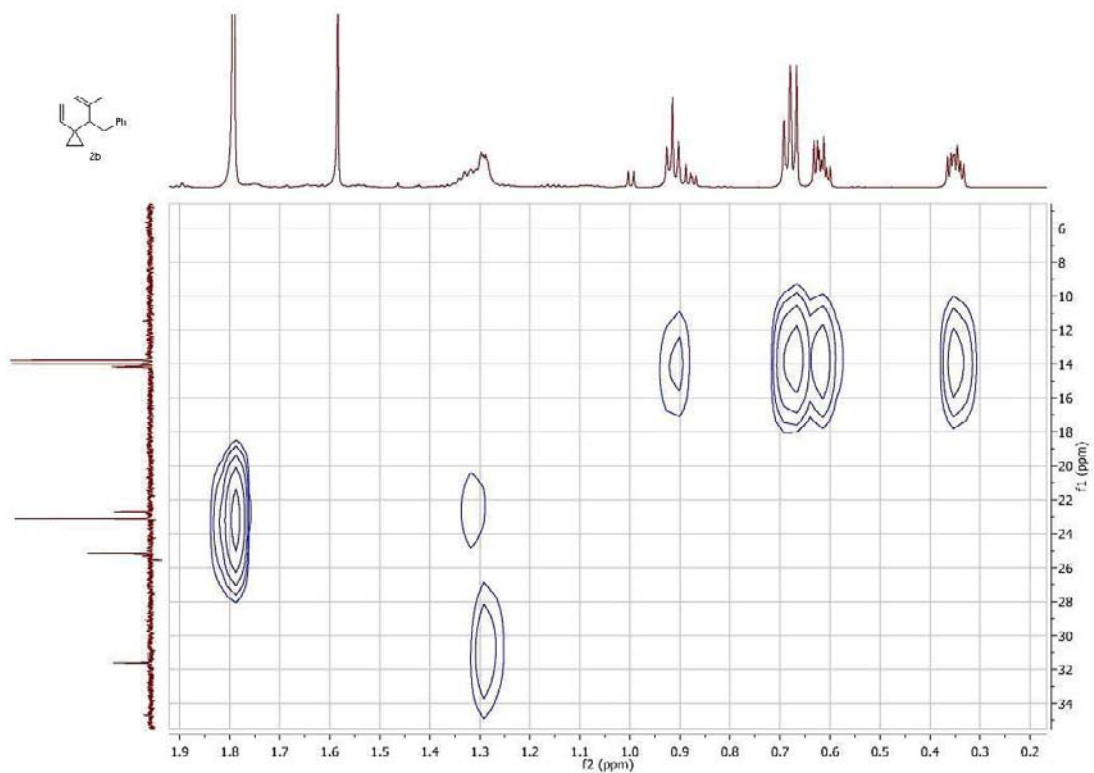

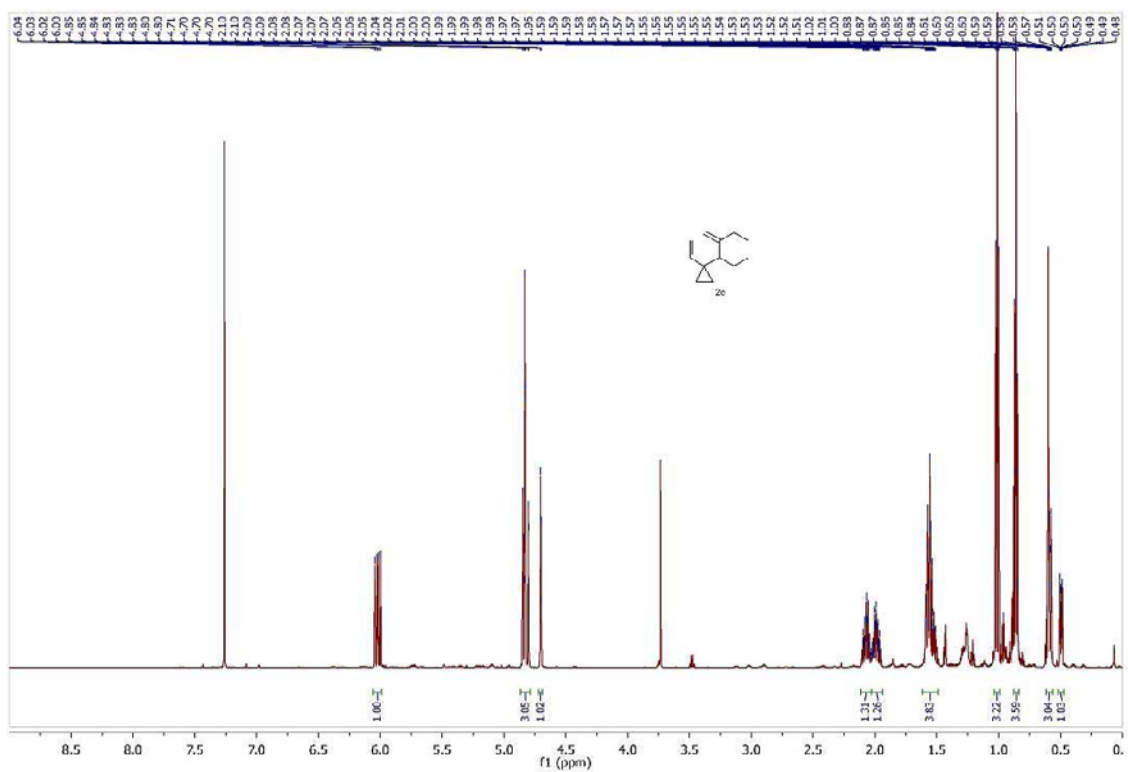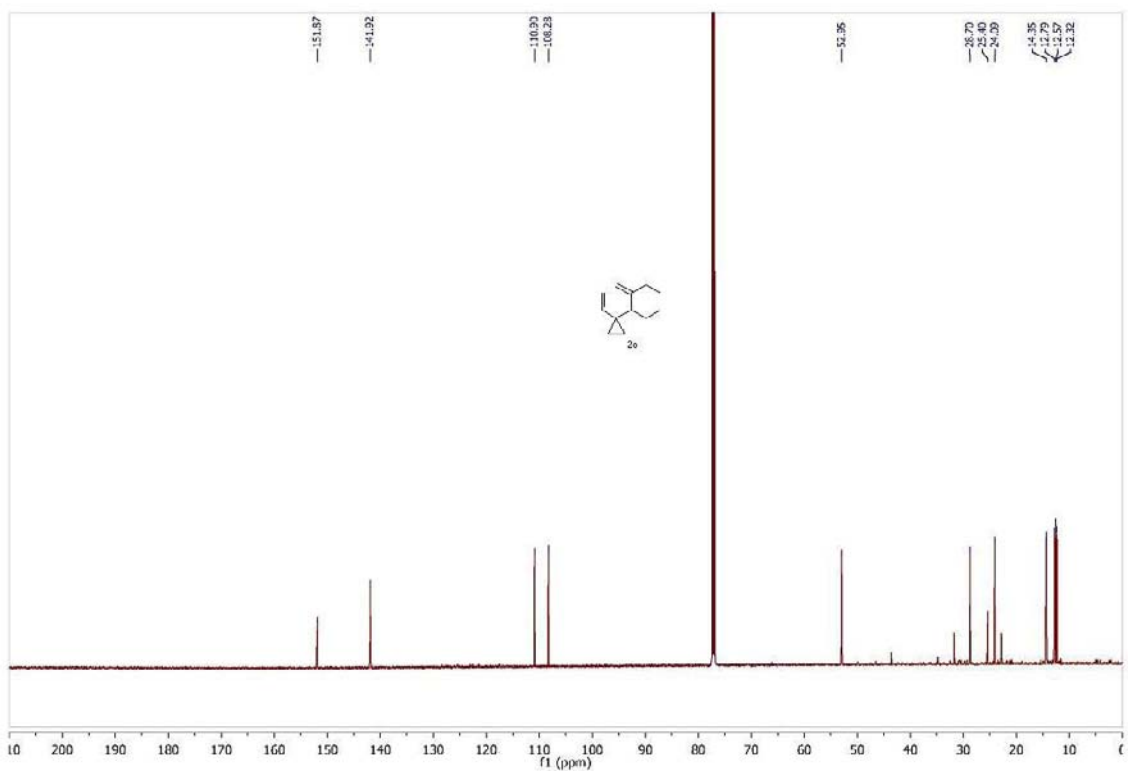



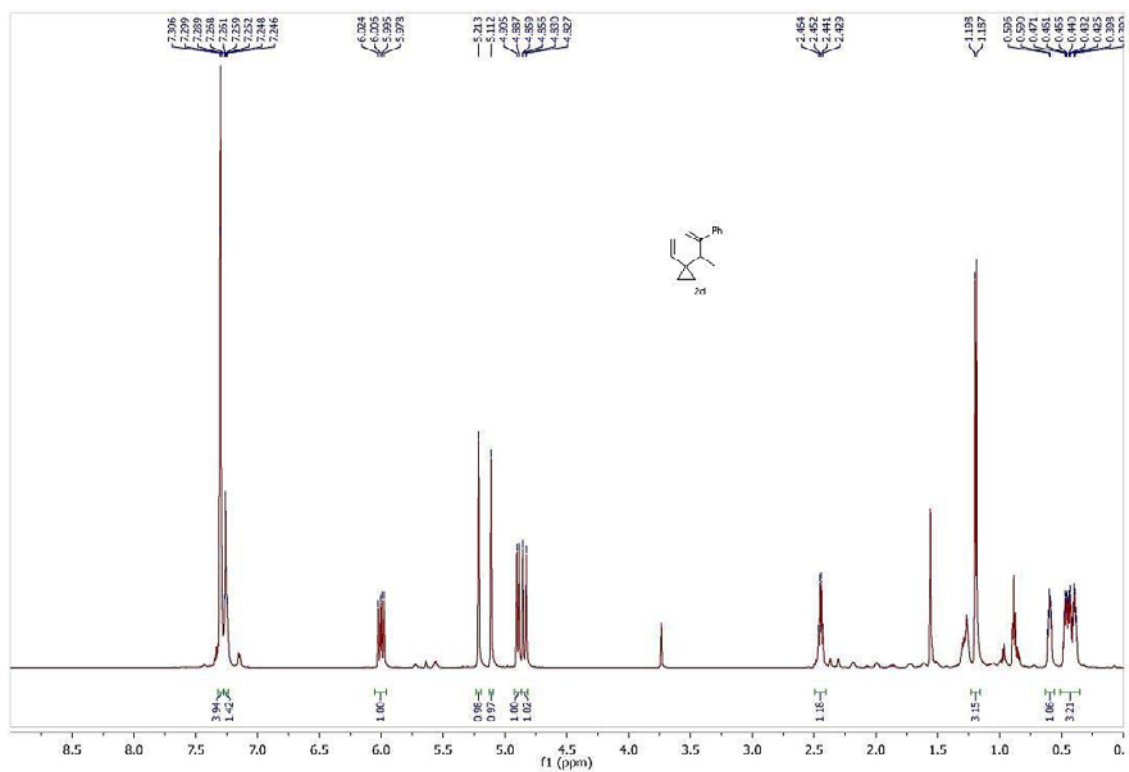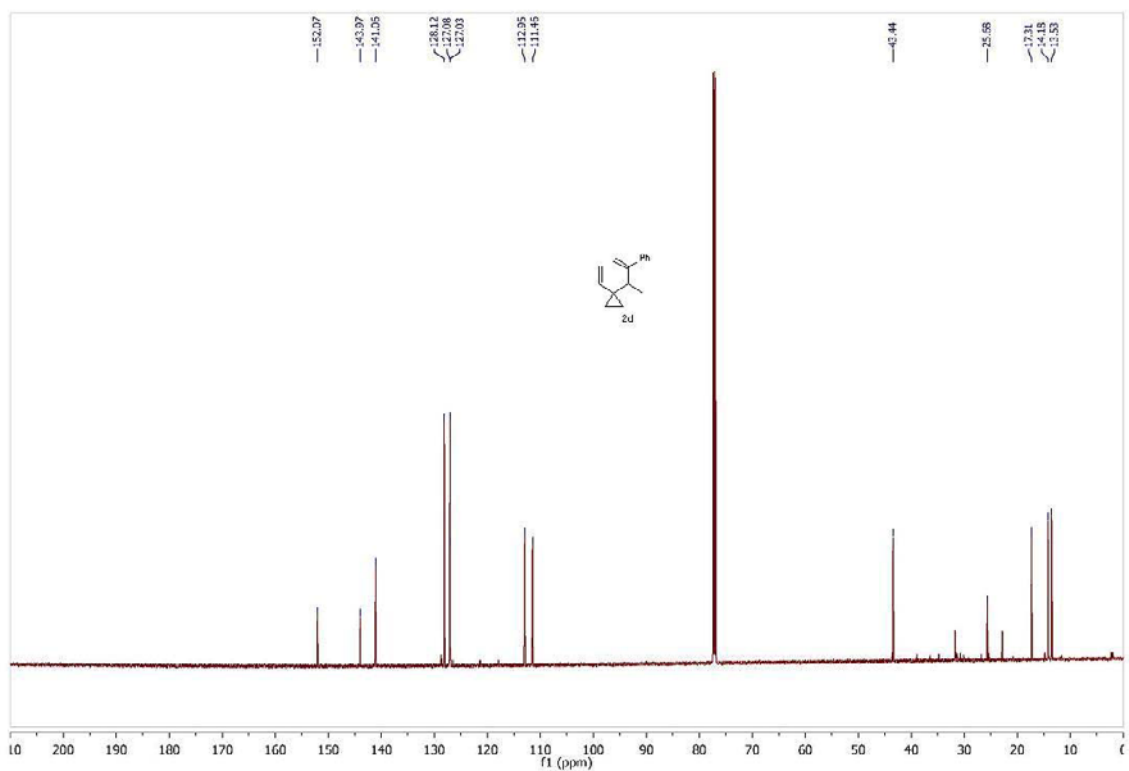

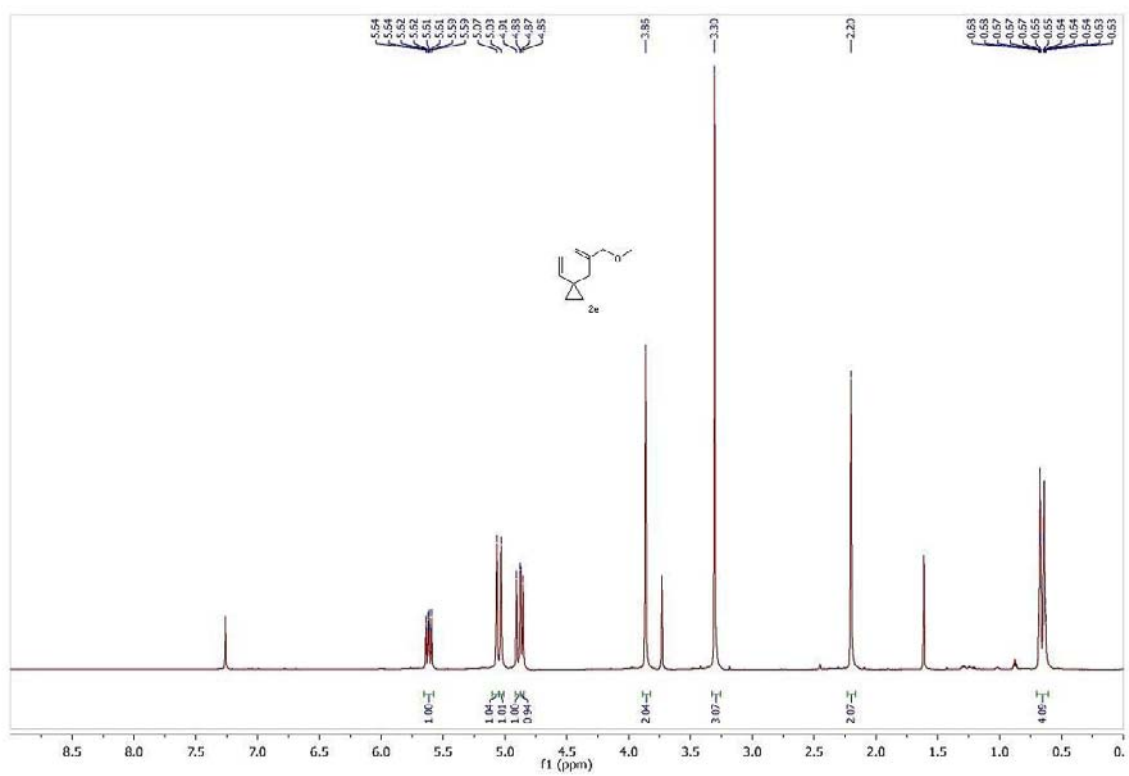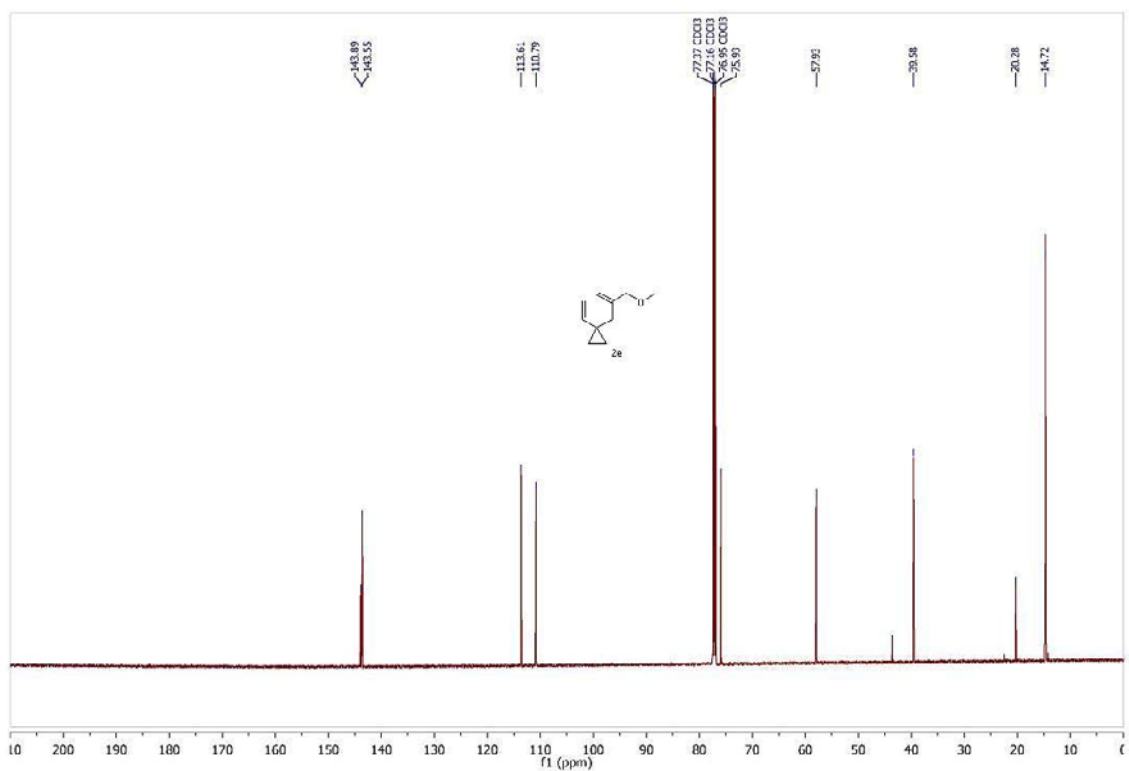

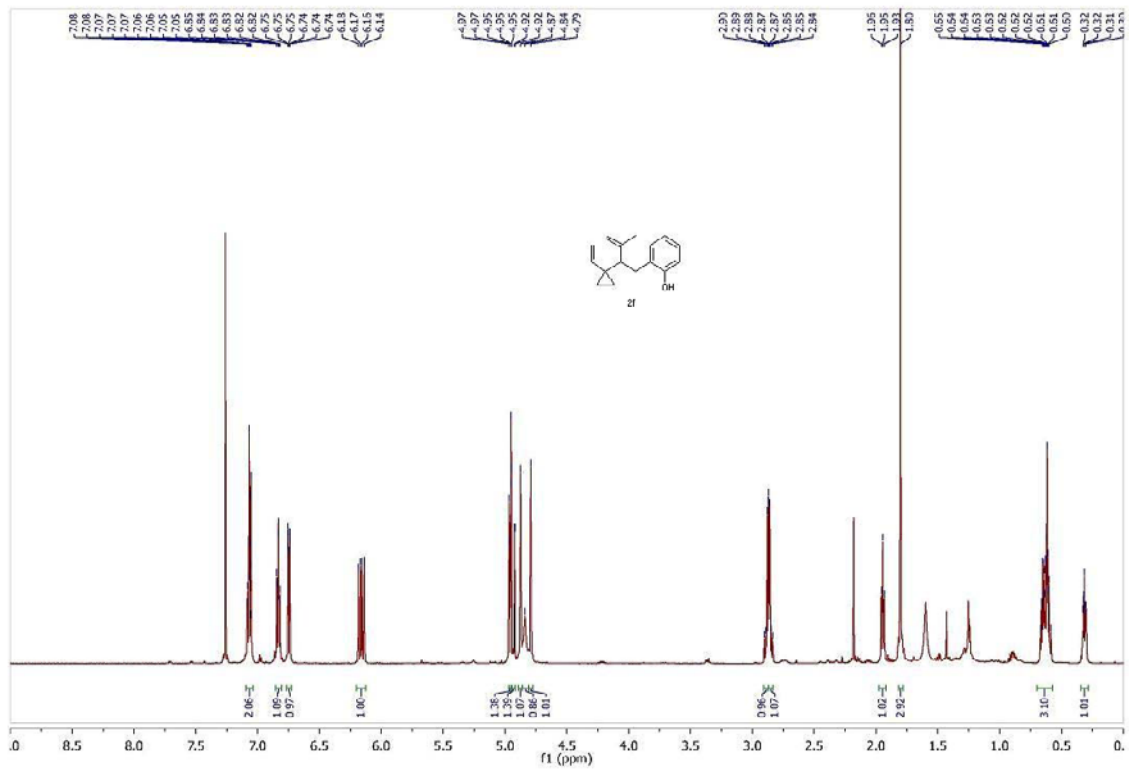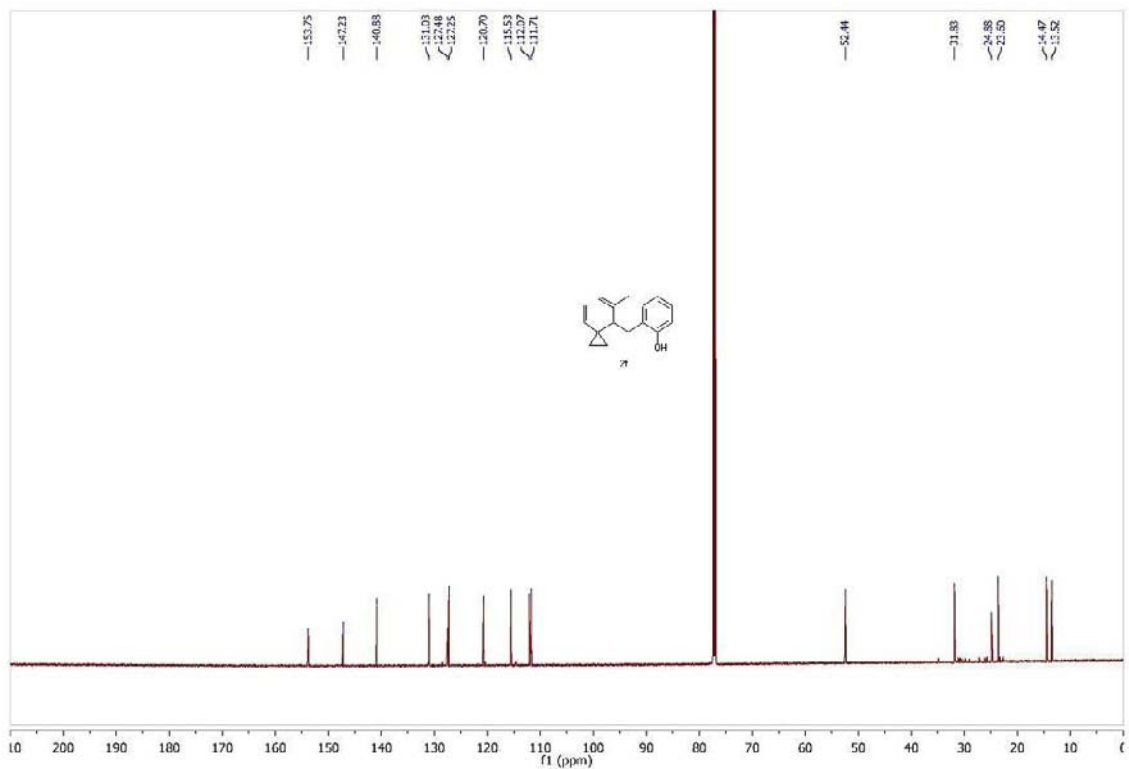



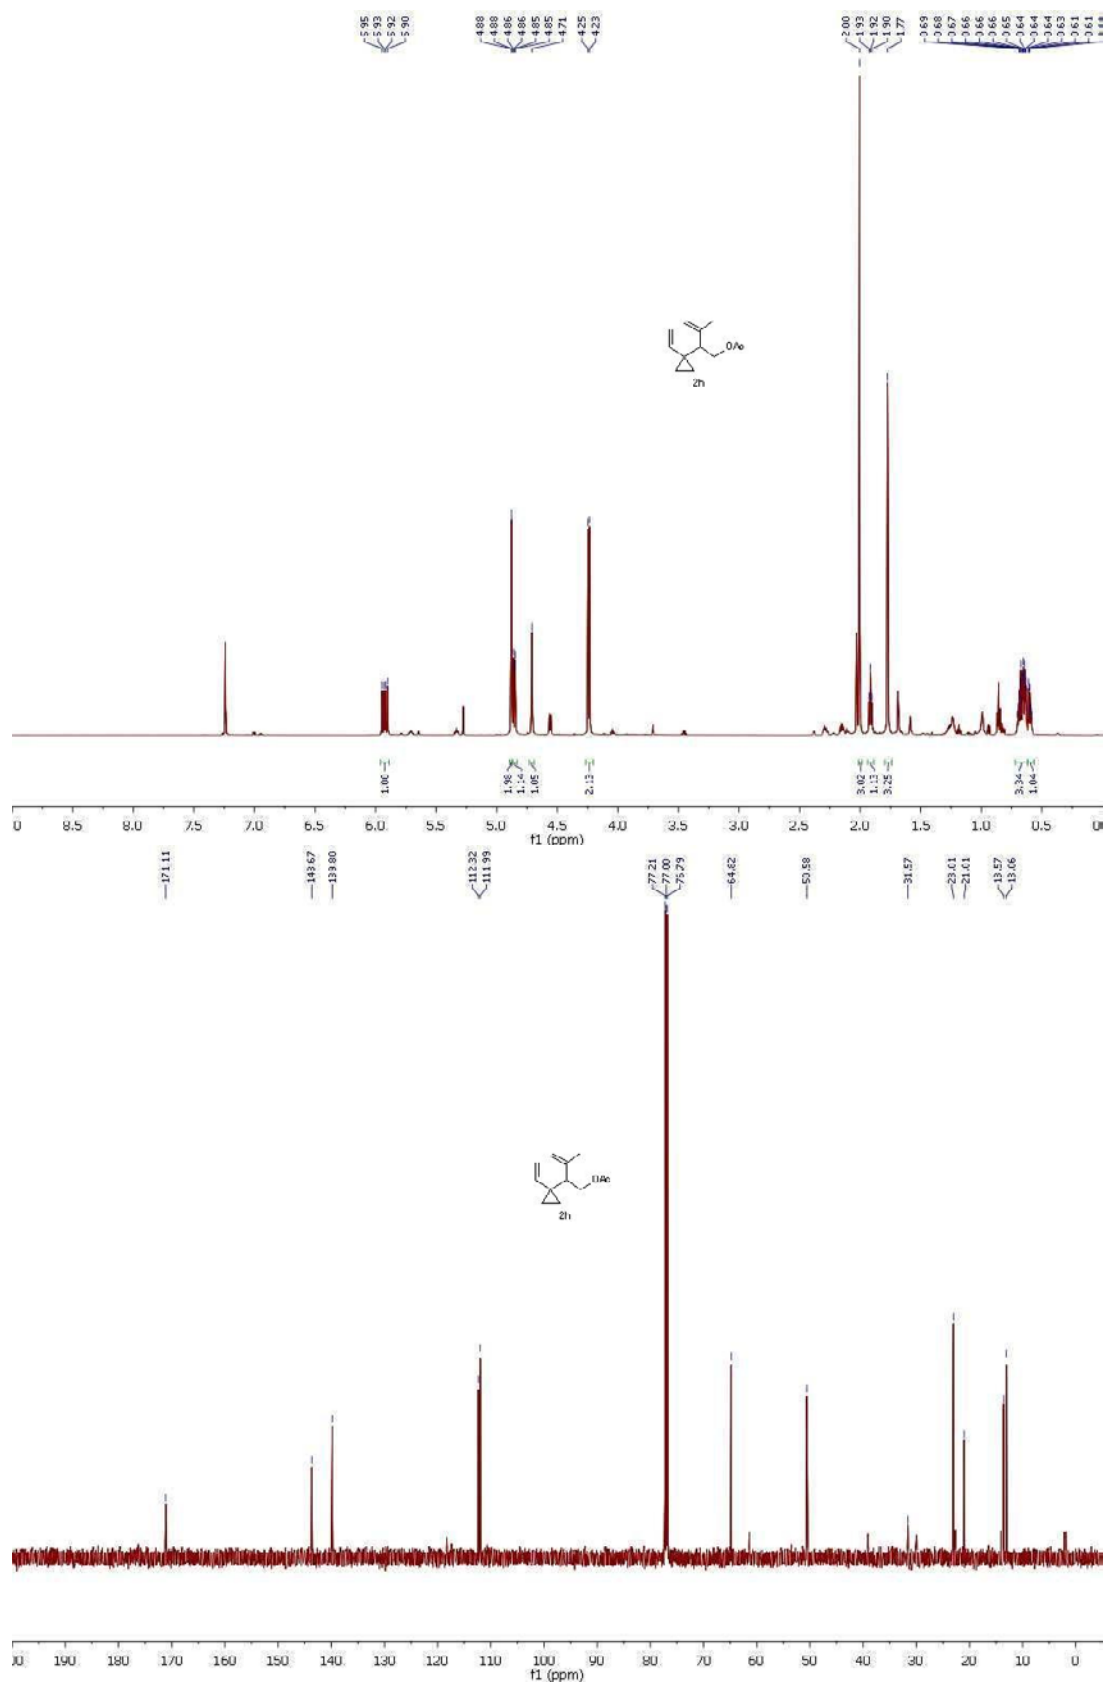

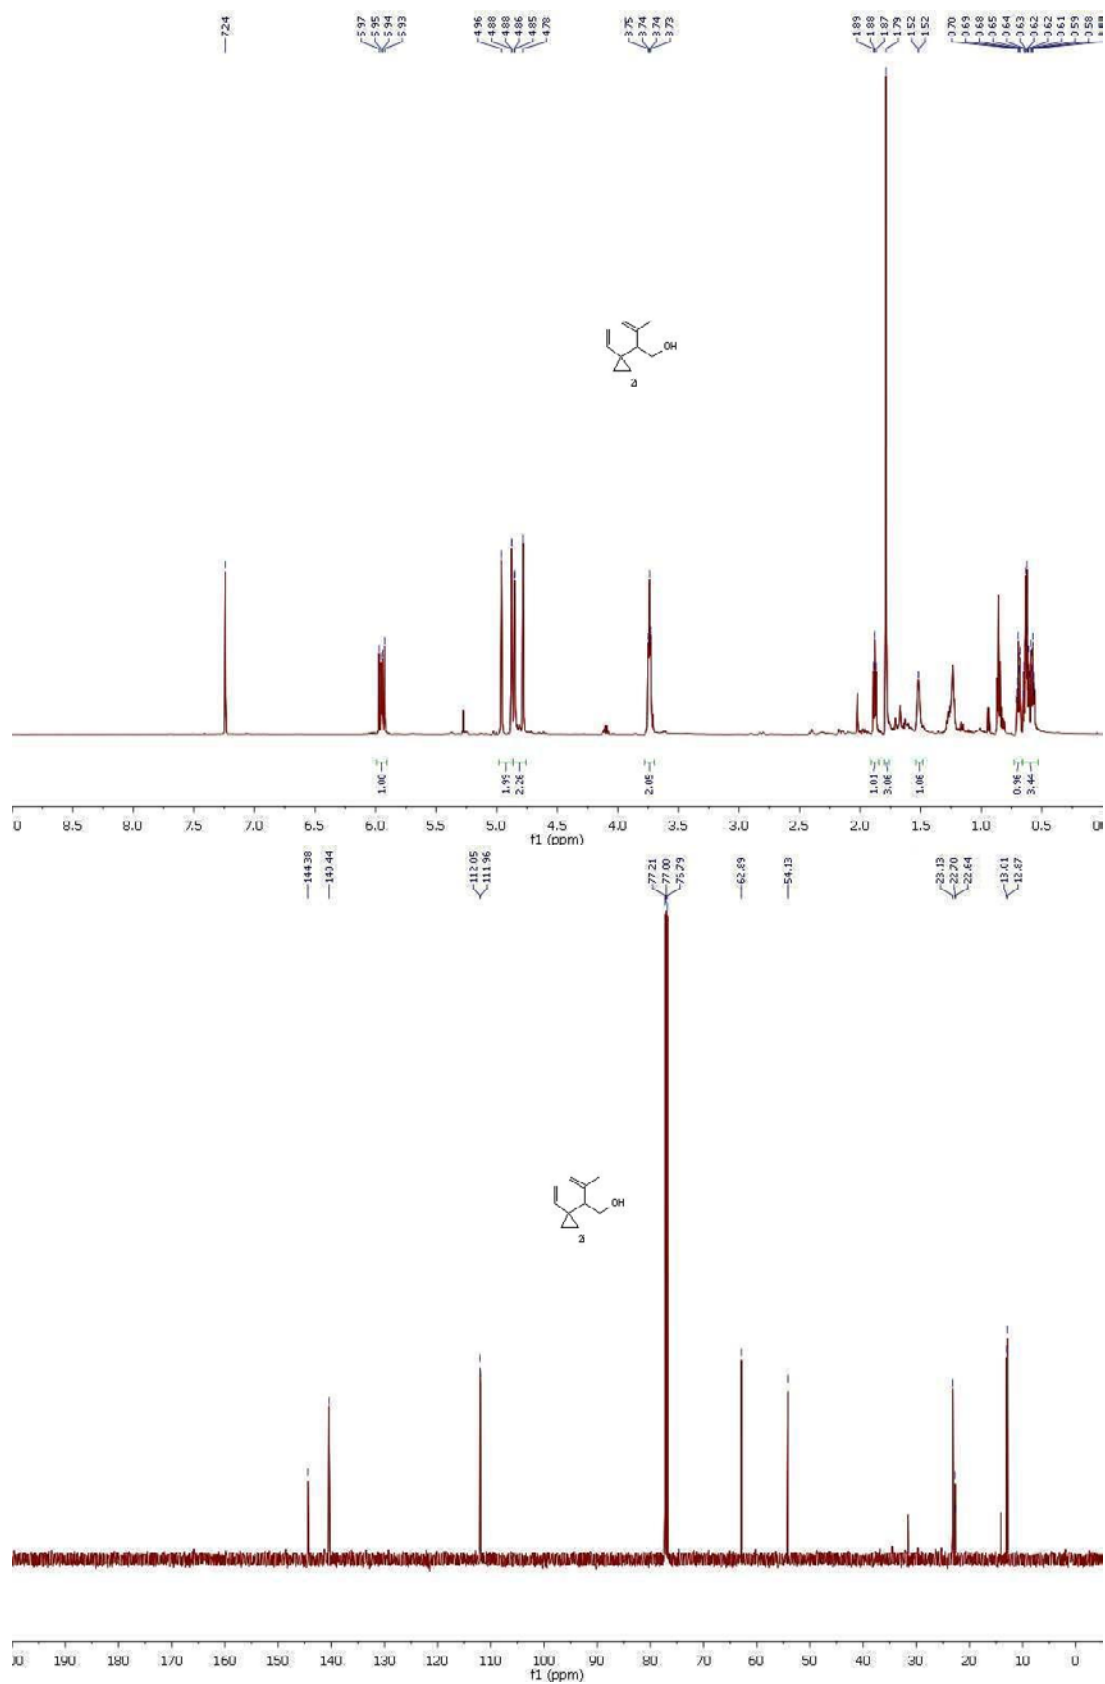

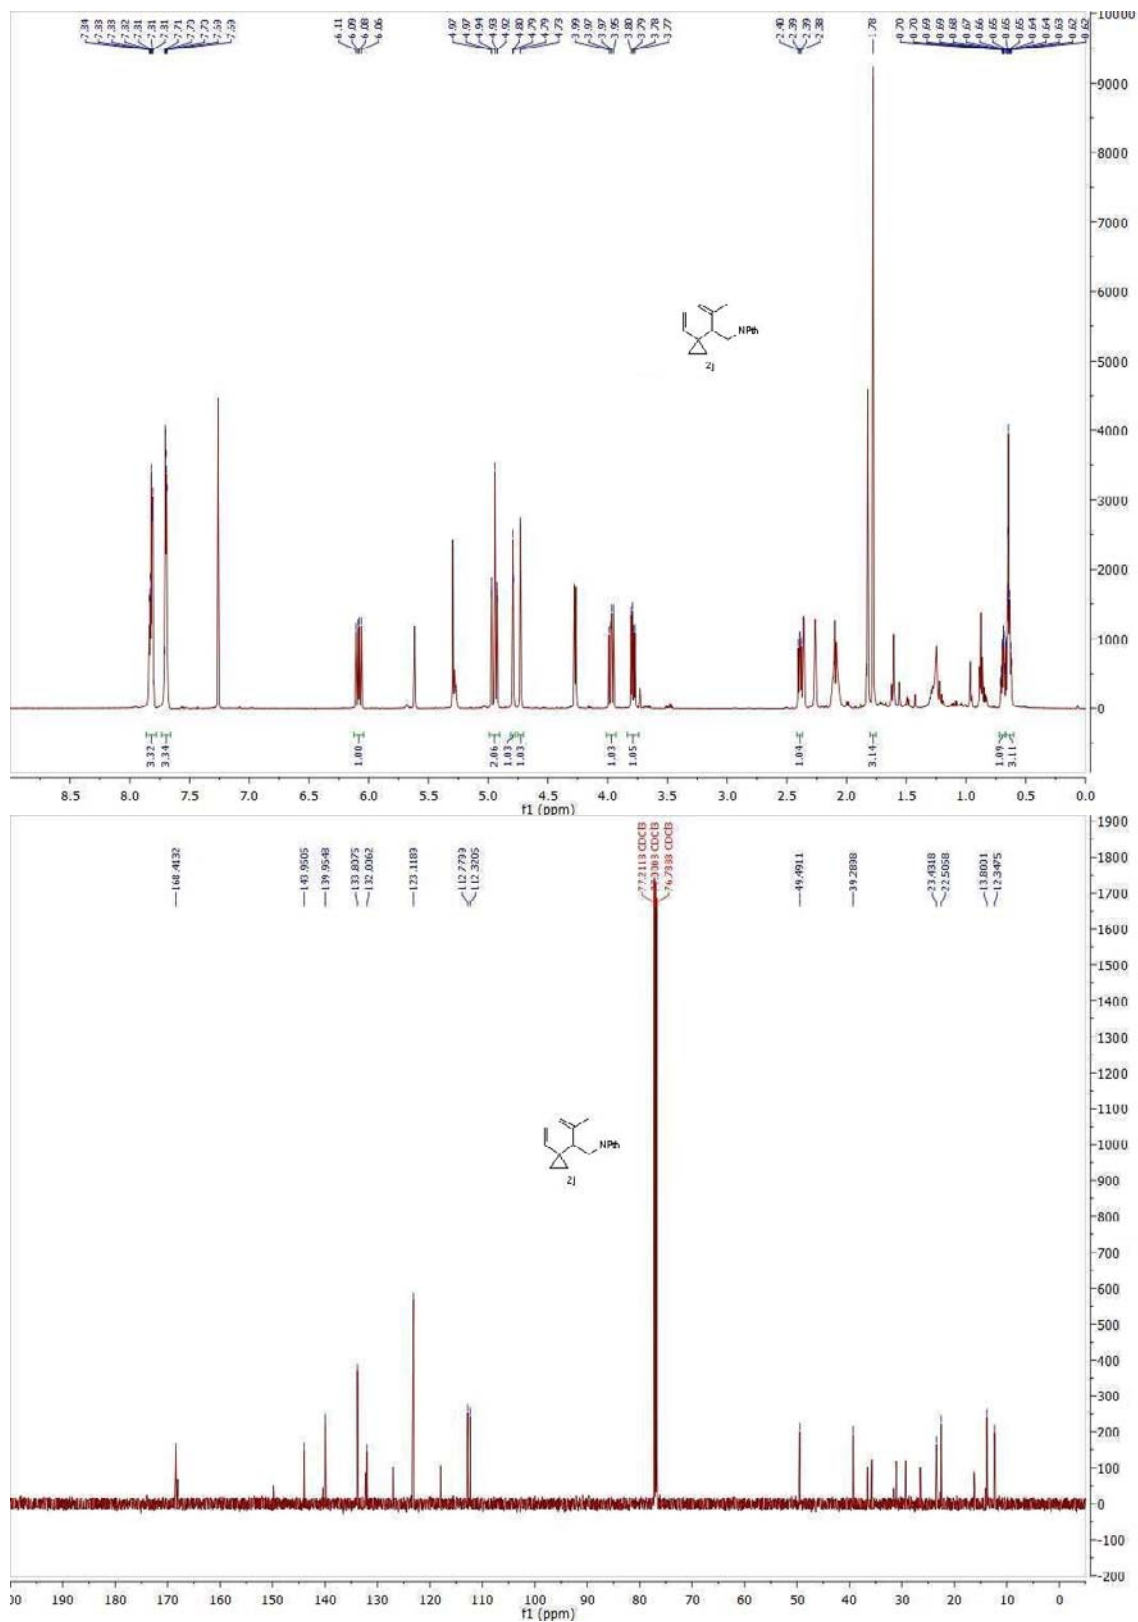

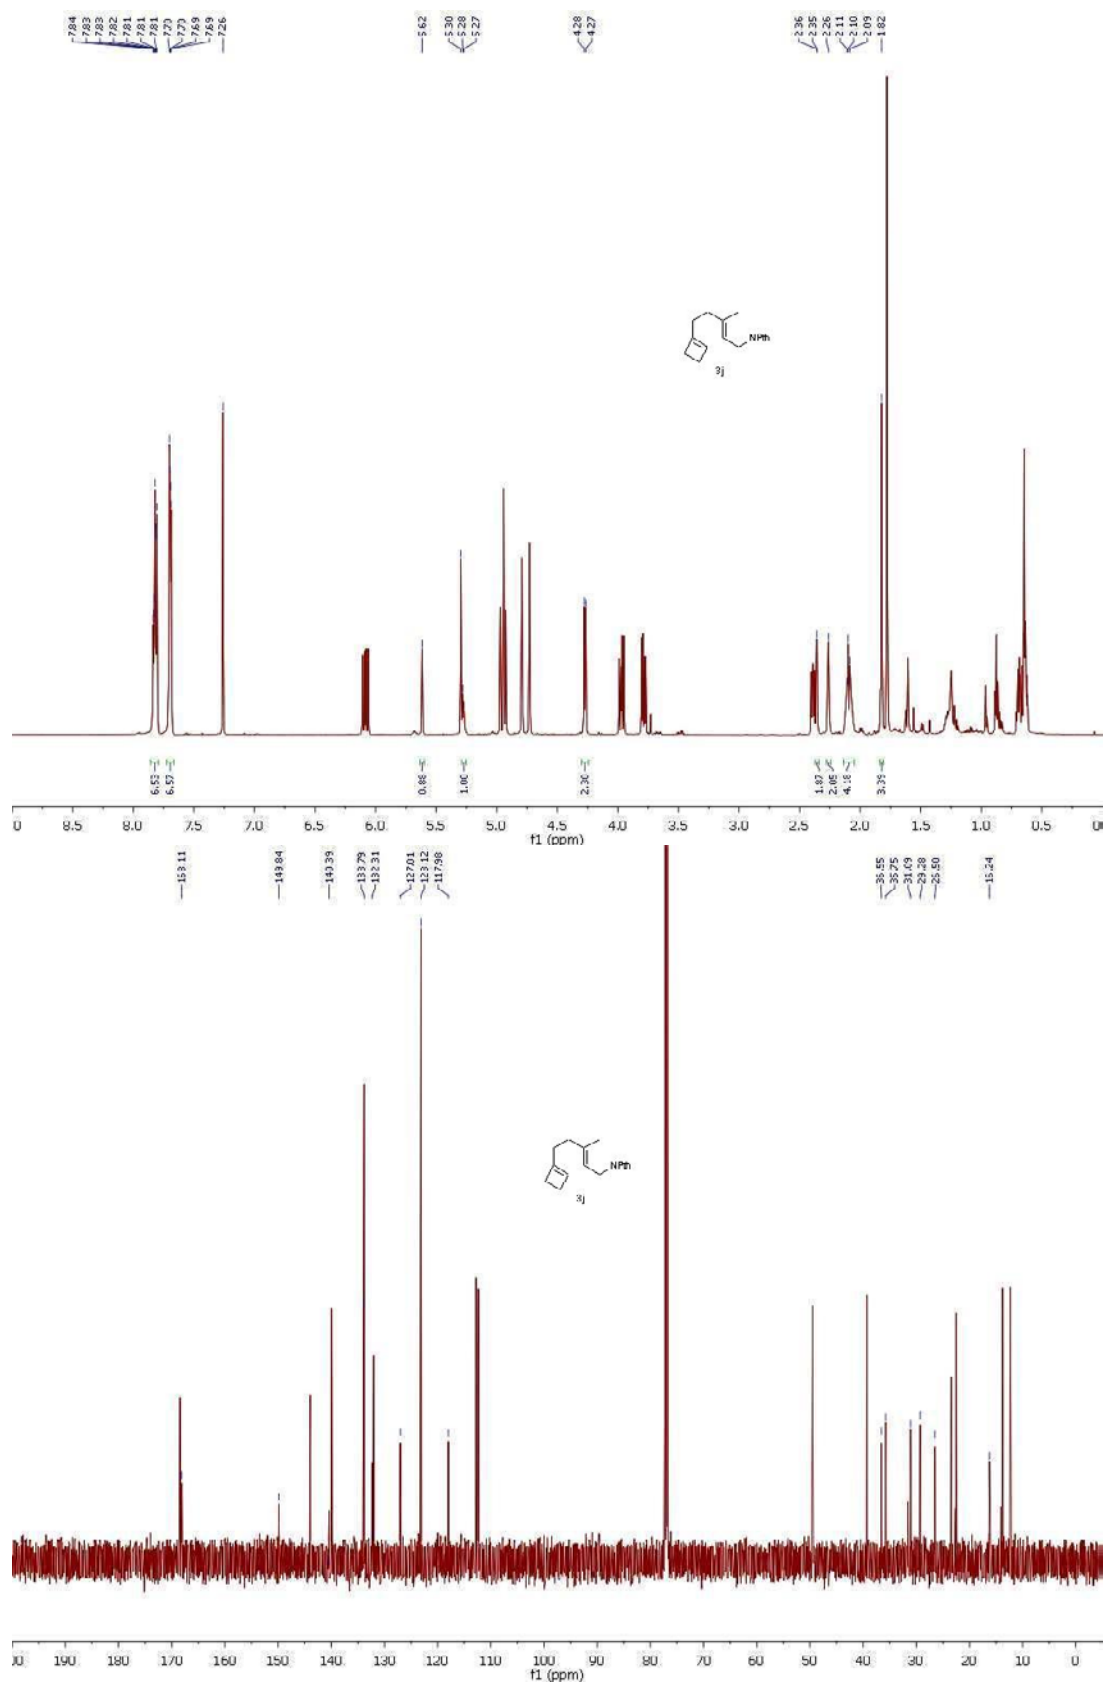



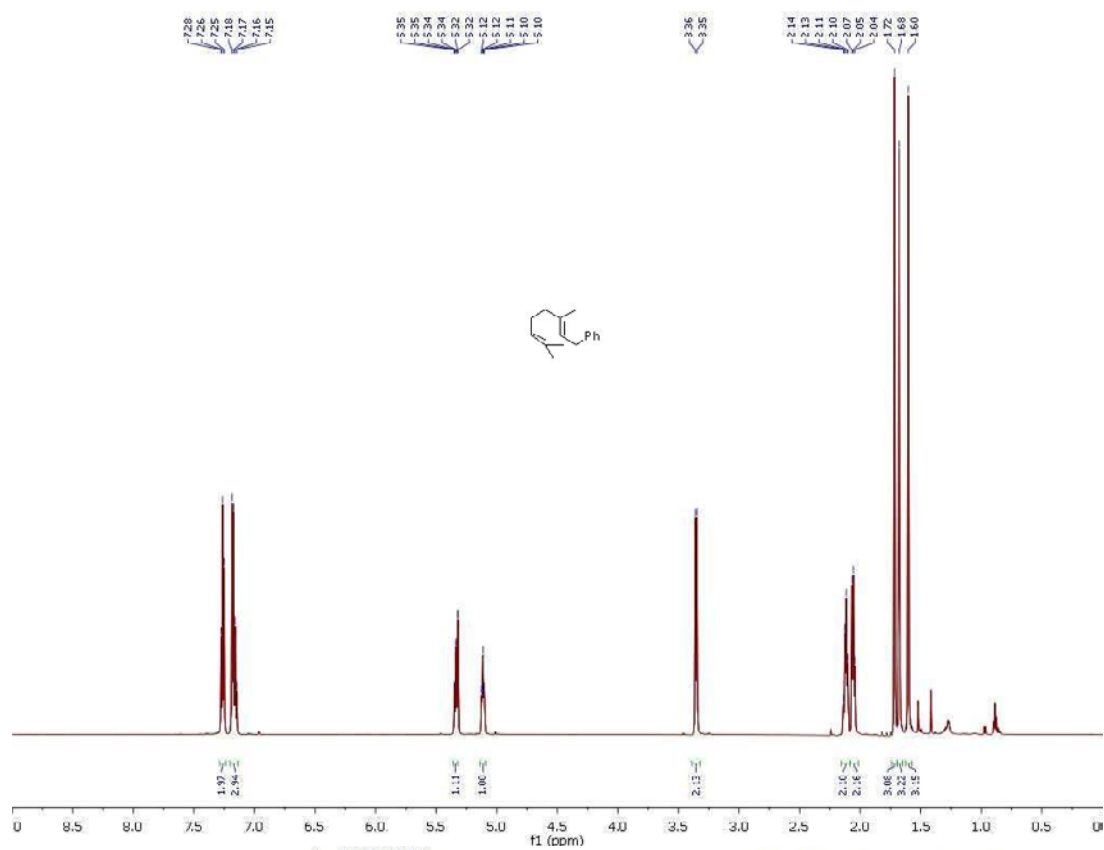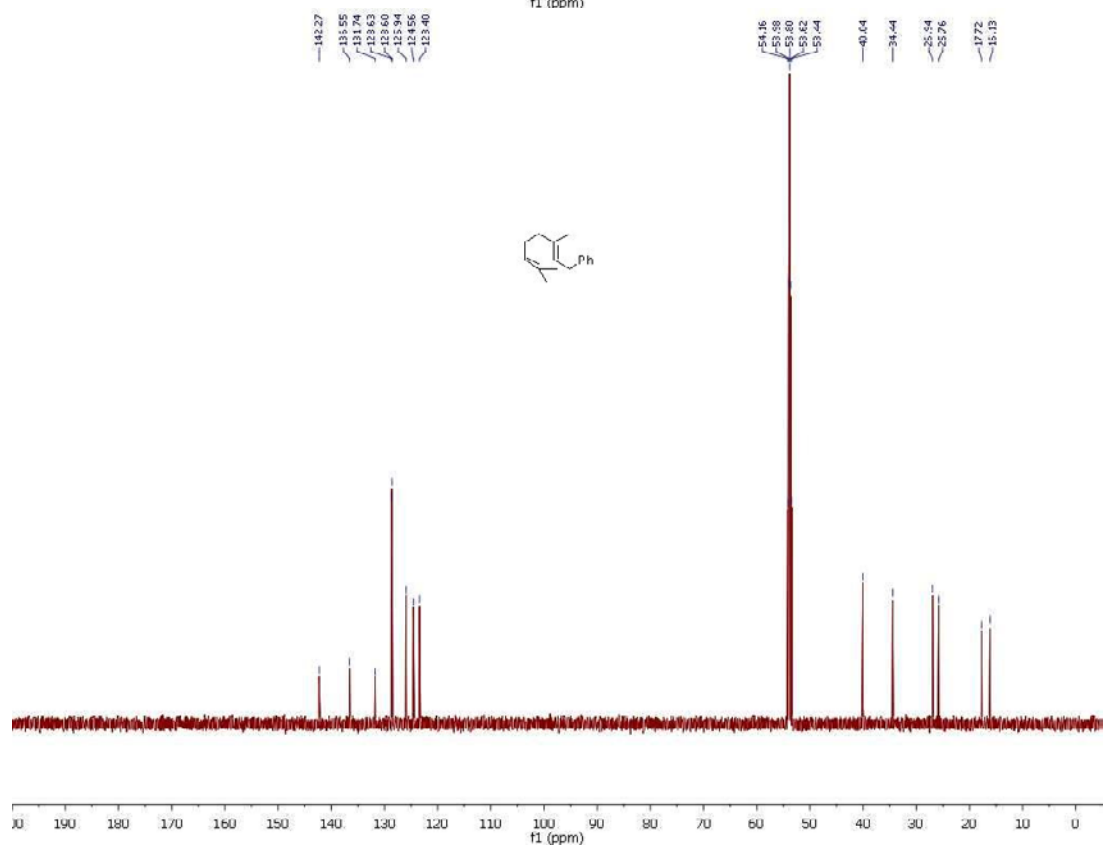

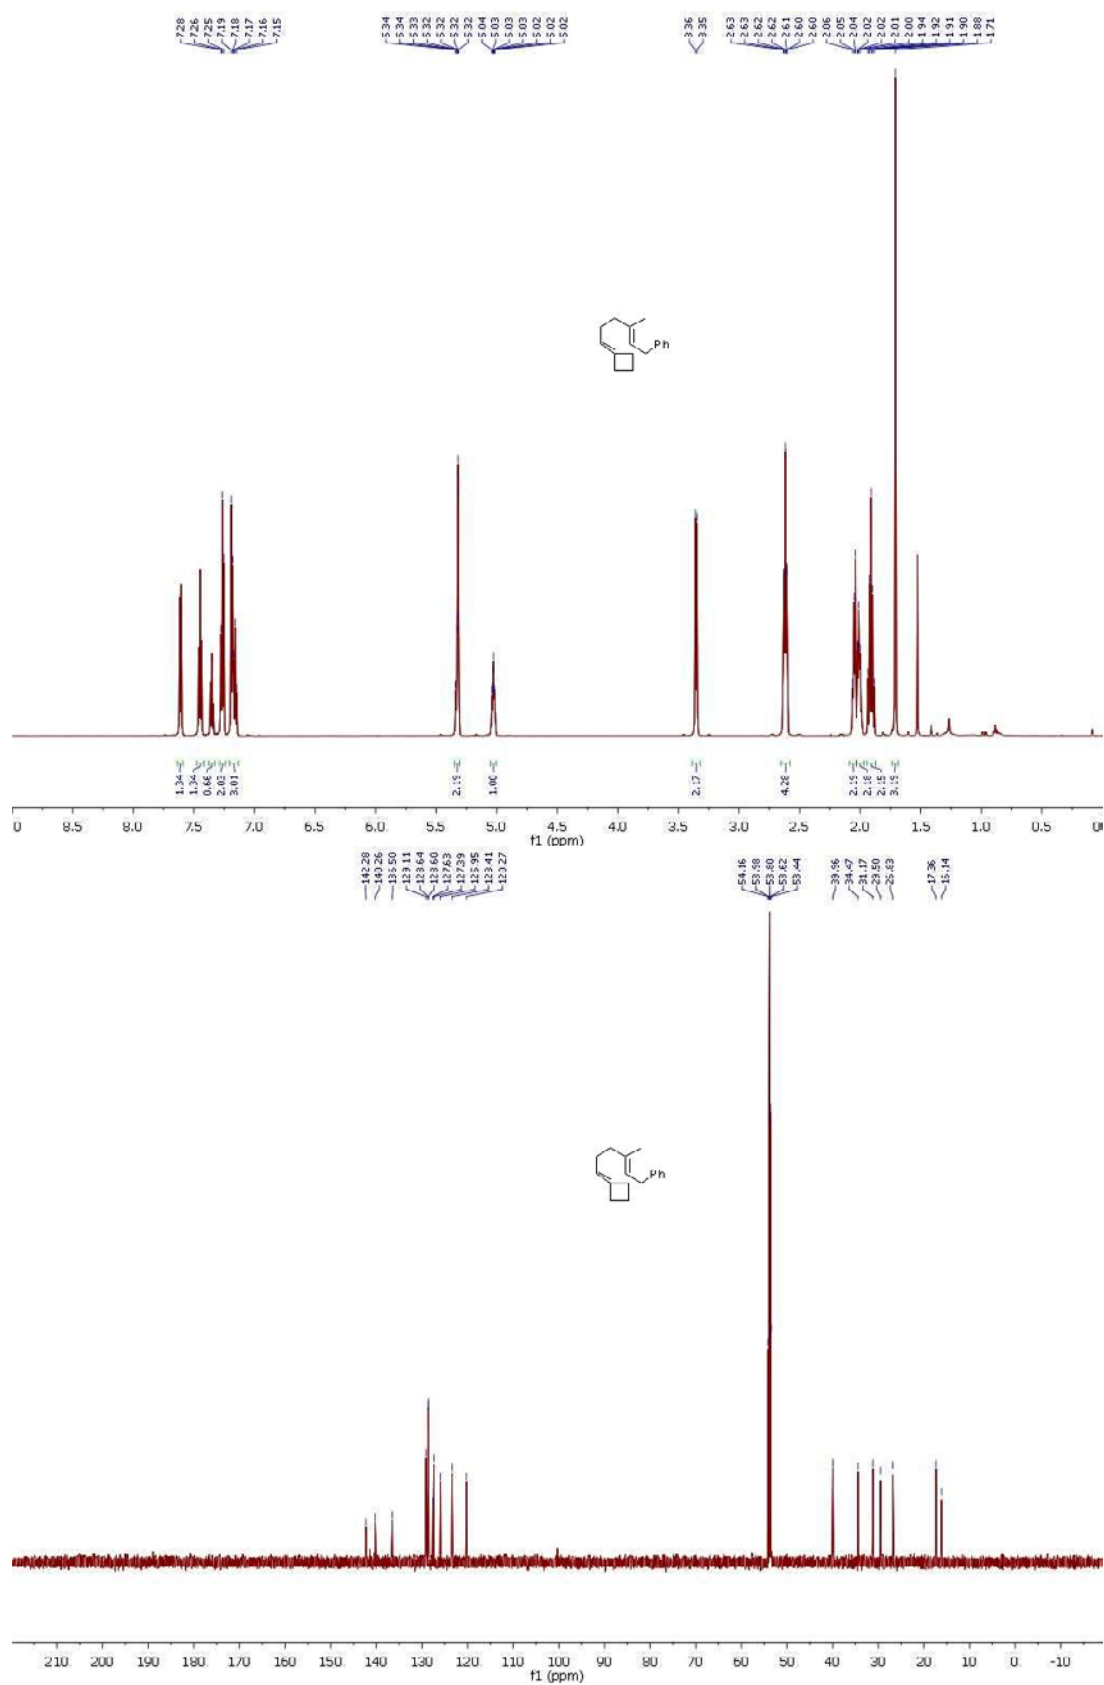

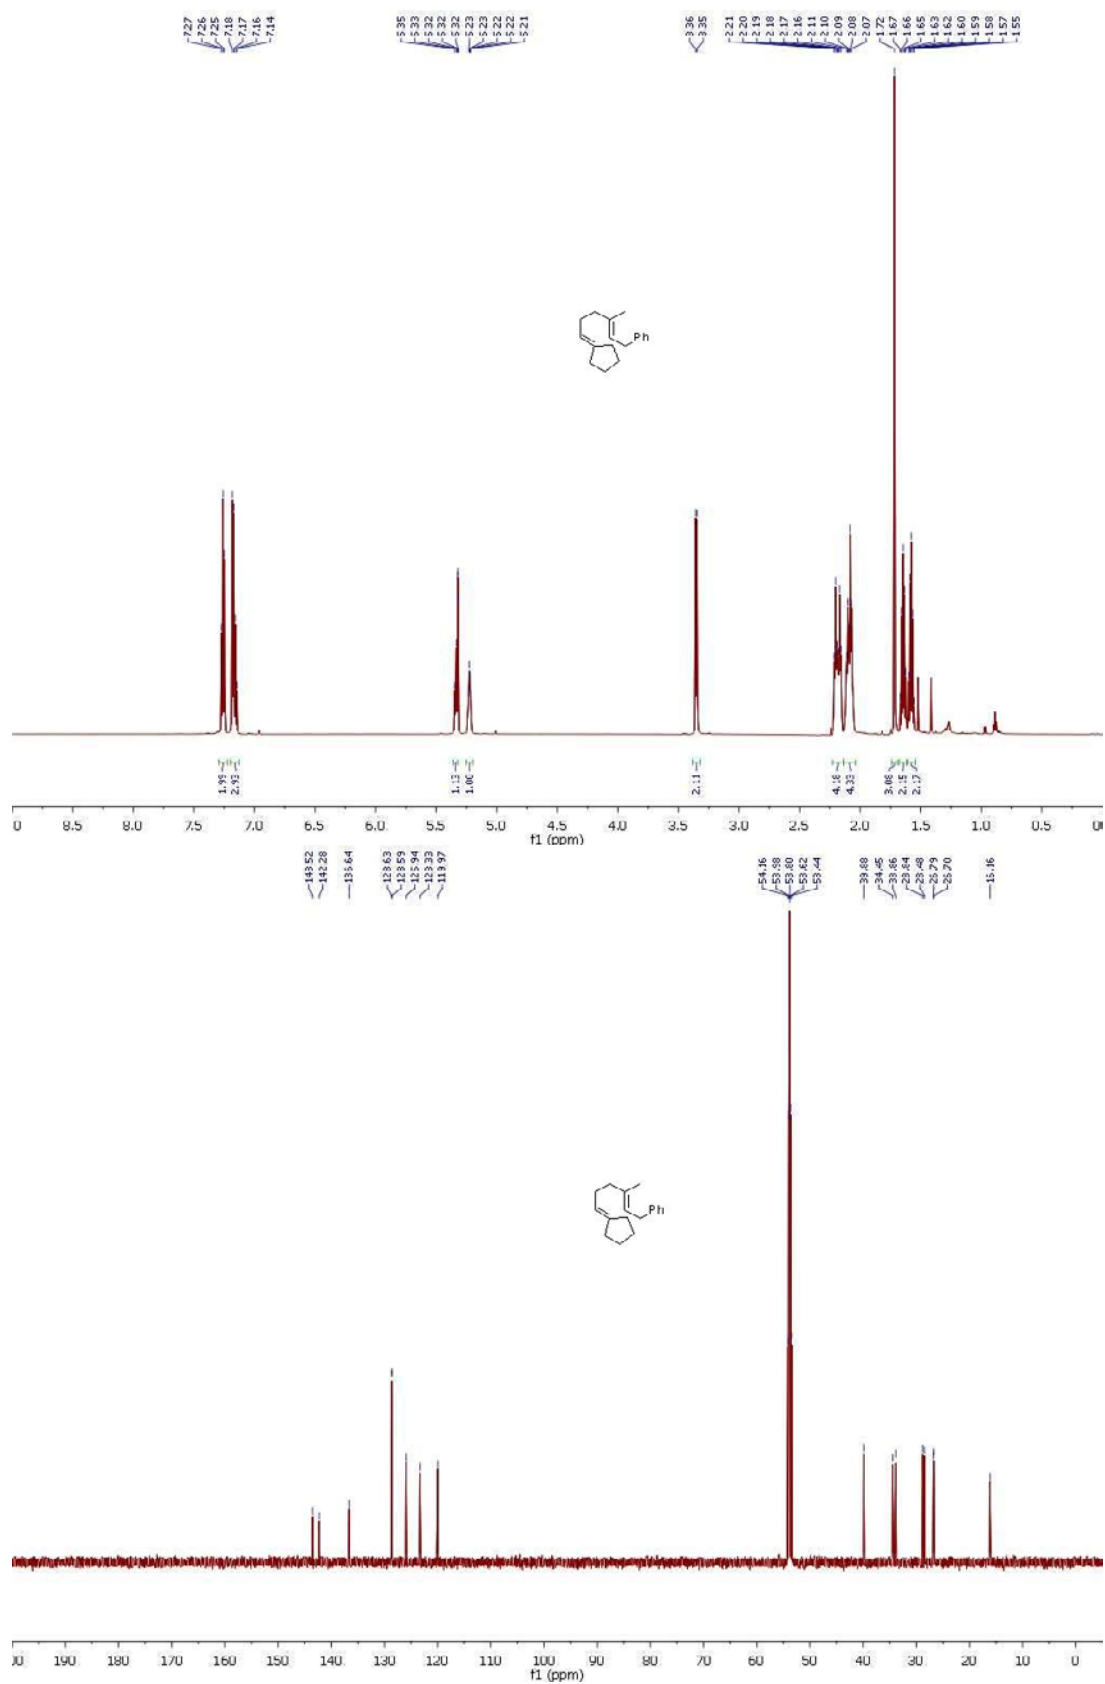

## 5. Gas Chromatography Results

Enantiomeric excess (ee's) were determined on a HP-6890 GC using an Agilent  $\beta$ -Cyclosil column. Inlet temperature was maintained at 250°C, 19.99 psi H<sub>2</sub>.

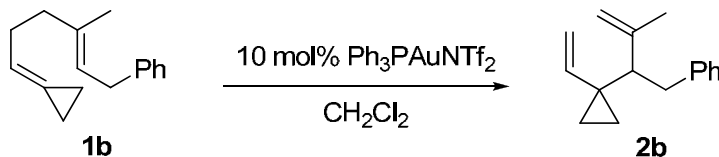

*Initial:* 80°C (5 min) *Ramp 1:* 2.0°C/min to 170°C (30 min)

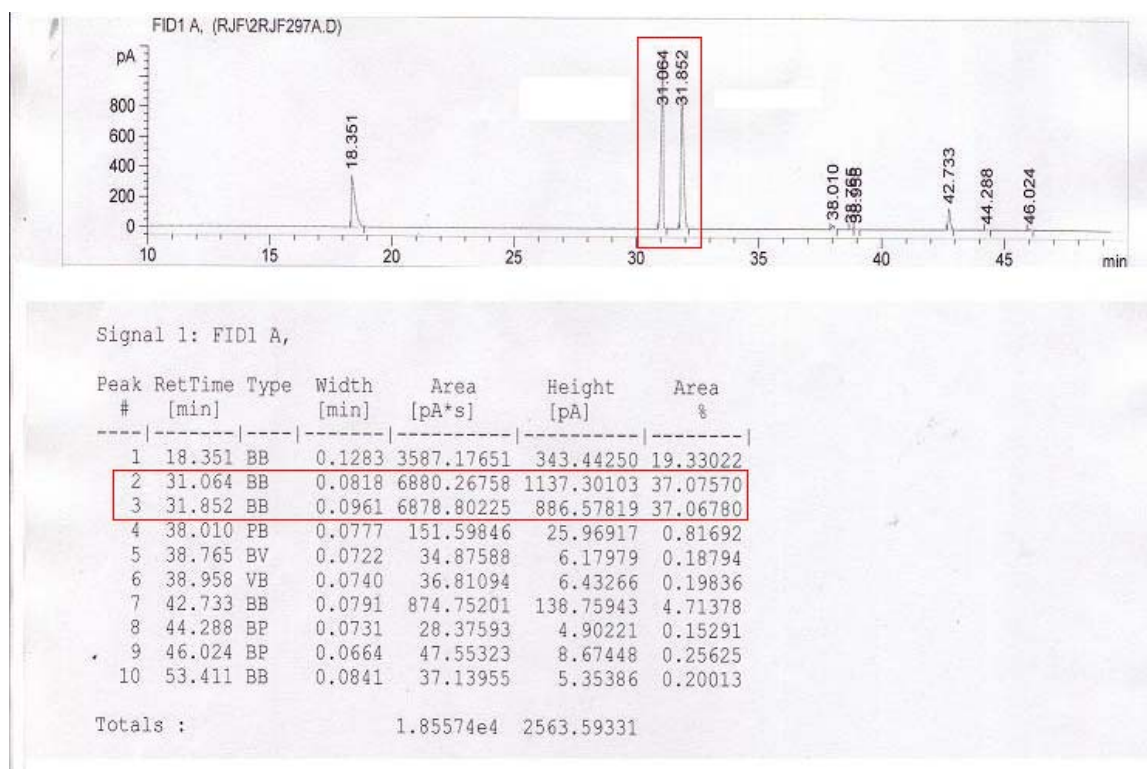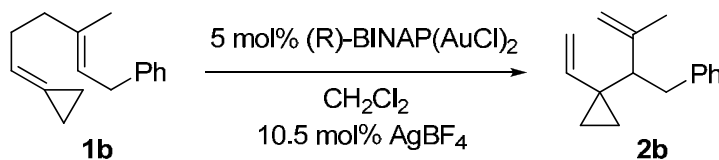

*Initial:* 80°C (5 min) *Ramp 1:* 2.0°C/min to 170°C (30 min)

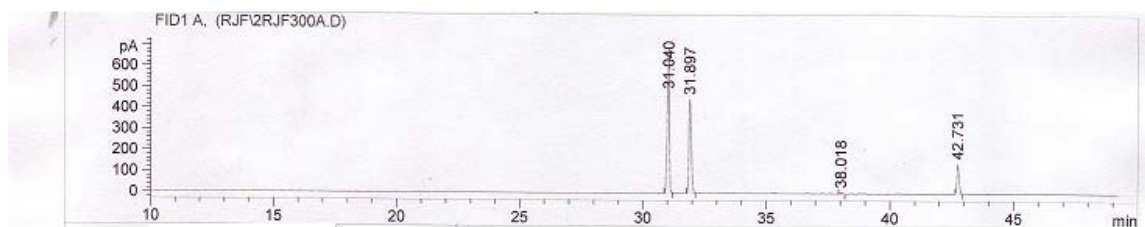

Signal 1: FID1 A,

| Peak #   | RetTime [min] | Type | Width [min] | Area [pA*s] | Height [pA] | Area %   |
|----------|---------------|------|-------------|-------------|-------------|----------|
| 1        | 31.040        | BB   | 0.0760      | 4052.35669  | 687.12292   | 50.85804 |
| 2        | 31.897        | BB   | 0.0864      | 2997.06396  | 446.25327   | 37.61387 |
| 3        | 38.018        | BB   | 0.0715      | 37.64063    | 6.66853     | 0.47240  |
| 4        | 42.731        | BB   | 0.0801      | 880.91492   | 142.46346   | 11.05569 |
| Totals : |               |      |             | 7967.97620  | 1282.50818  |          |

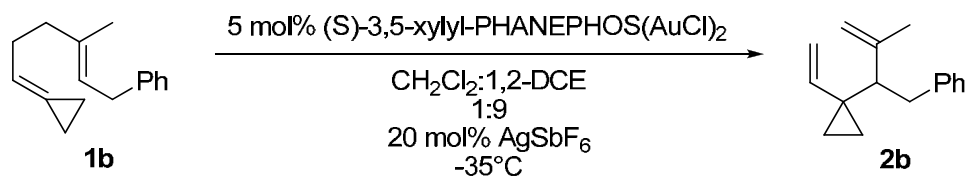

Initial: 80°C (14 min) Ramp 1: 2.0°C/min to 130°C (0 min) Ramp 2: 20°C/min to 170°C (7 min)

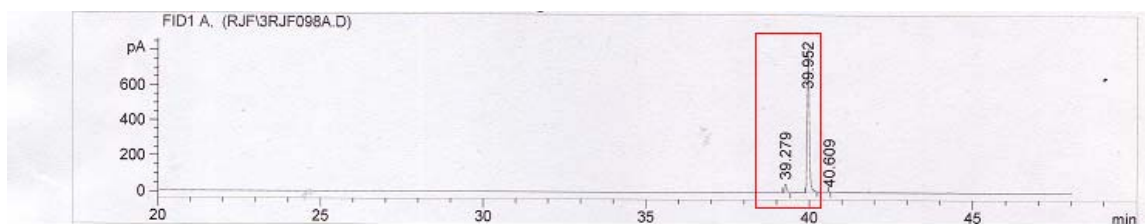

Signal 1: FID1 A,

| Peak #   | RetTime [min] | Type | Width [min] | Area [pA*s] | Height [pA] | Area %   |
|----------|---------------|------|-------------|-------------|-------------|----------|
| 1        | 39.279        | BB   | 0.0643      | 239.81931   | 47.64743    | 6.49692  |
| 2        | 39.952        | PB   | 0.0583      | 3447.78027  | 812.22766   | 93.40341 |
| 3        | 40.609        | BB   | 0.0293      | 3.67938     | 1.75539     | 0.09968  |
| Totals : |               |      |             | 3691.27896  | 861.63048   |          |

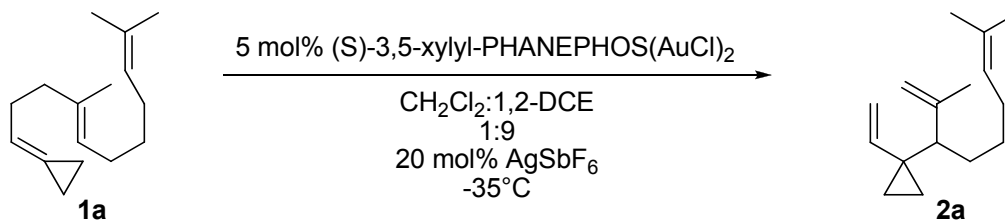

*Initial: 60°C (14 min) Ramp 1: 5.0°C/min to 100°C (10 min) Ramp 2: 10°C/min to 130°C (10 min) Ramp 3: 10°C/min to 170°C (0 min)*

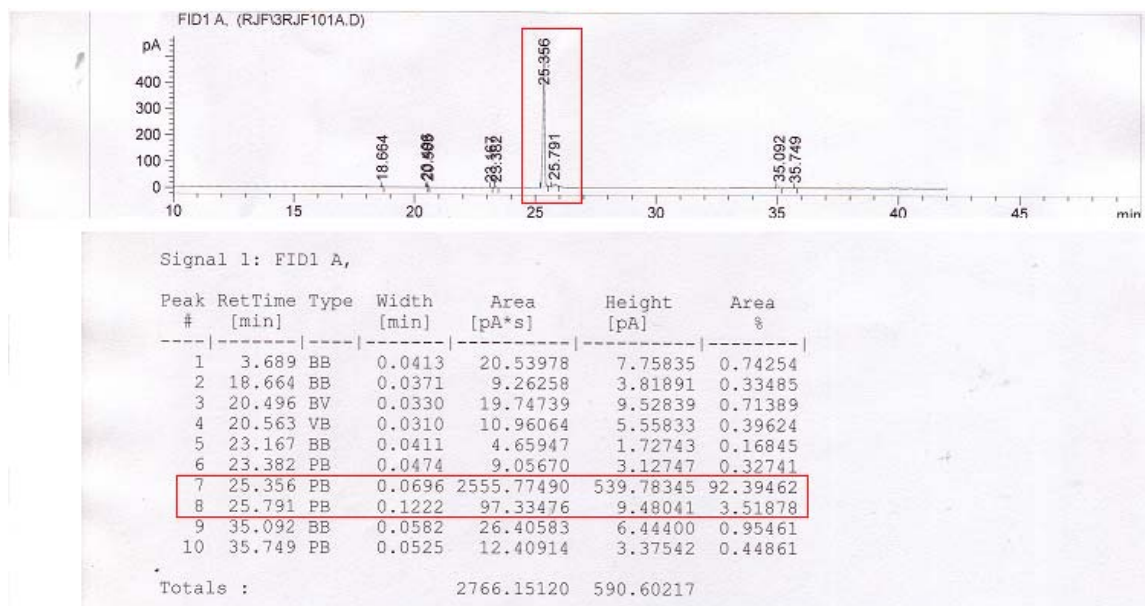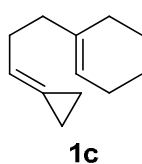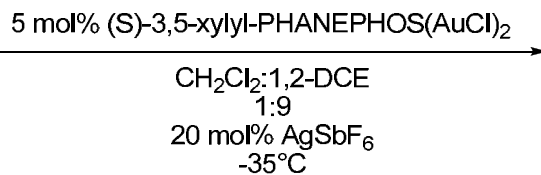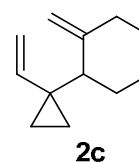

*Initial: 60°C (14 min) Ramp 1: 10°C/min to 170°C (10 min)*



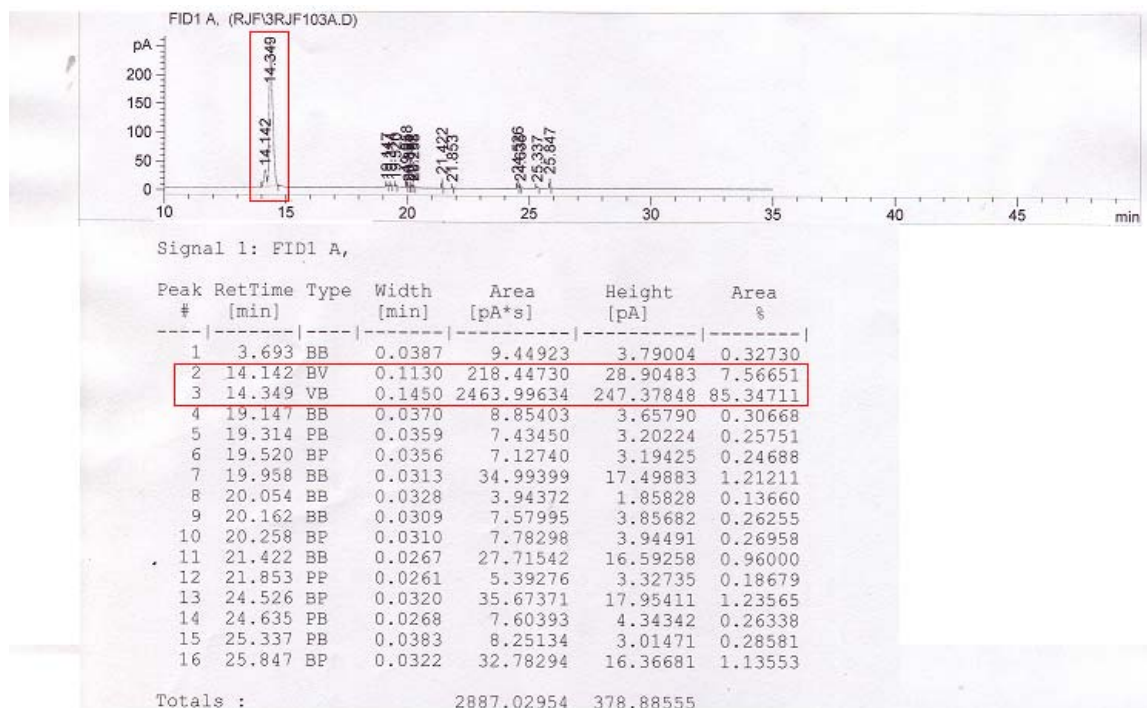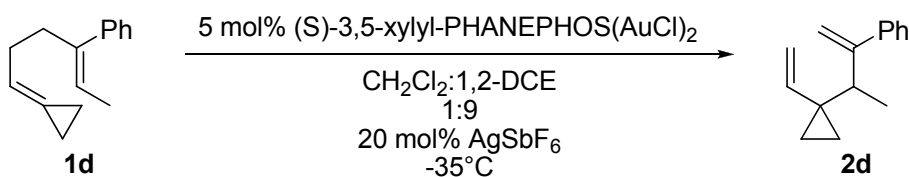

Initial: 80°C (14 min) Ramp 1: 2.0°C/min to 130°C (0 min) Ramp 2: 20°C/min to 170°C (7 min)

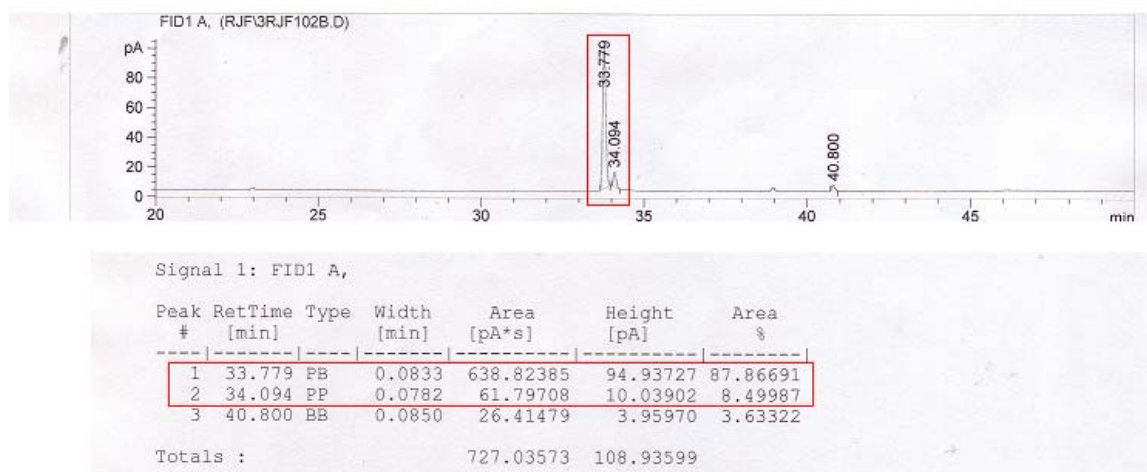

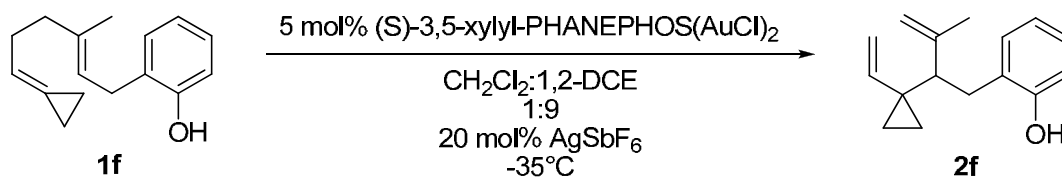

*Initial:* 100°C (10 min) *Ramp 1:* 2.0°C/min to 130°C (5 min) *Ramp 2:* 5.0°C/min to 170°C (20 min)

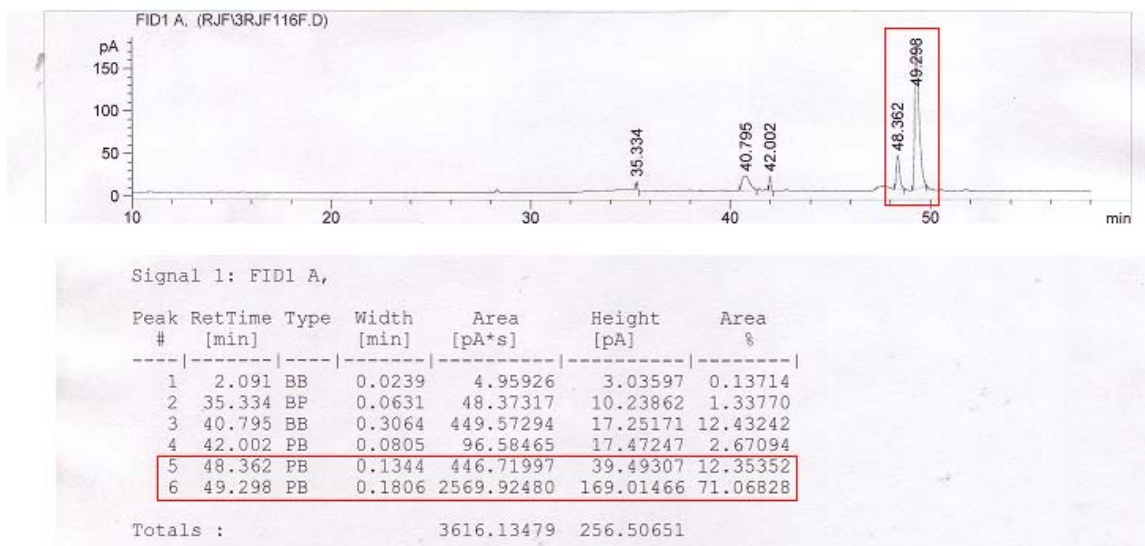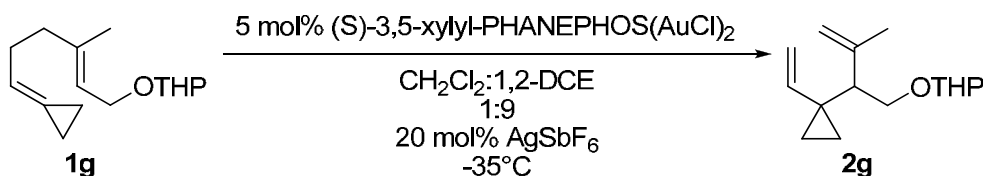

*Initial:* 80°C (10 min) *Ramp 1:* 1.0°C/min to 100°C (10 min) *Ramp 2:* 1.0°C/min to 110 (15 min) *Ramp 3:* 1.0°C/min to 115°C (12 min) *Ramp 4:* 1°C/min 120 (10 min) *Ramp 5:* 20°C/min to 170°C (7 min)



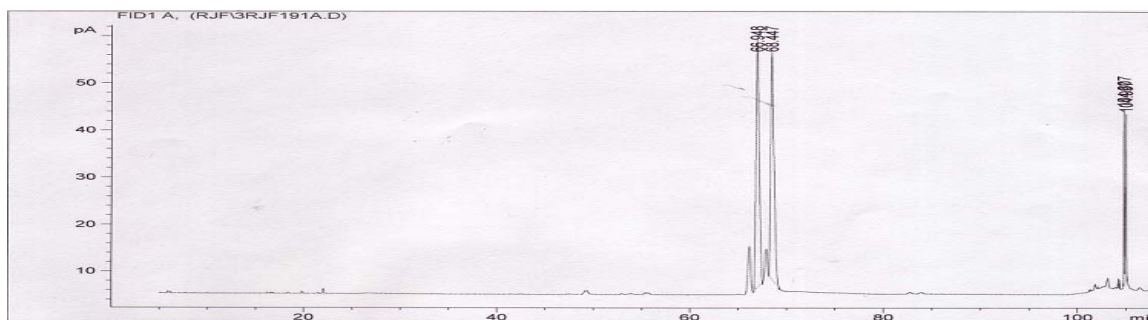

Signal 1: FID1 A,

| Peak # | RetTime [min] | Type | Width [min] | Area [pA*s] | Height [pA] | Area %   |
|--------|---------------|------|-------------|-------------|-------------|----------|
| 1      | 66.147        | PV   | 0.3196      | 203.32793   | 10.03438    | 6.26077  |
| 2      | 66.946        | VV   | 0.3472      | 1302.15051  | 53.64042    | 40.09513 |
| 3      | 67.901        | VV   | 0.3445      | 204.95366   | 9.04174     | 6.31082  |
| 4      | 68.443        | VB   | 0.3930      | 1312.88062  | 50.48575    | 40.42552 |
| 5      | 105.002       | VB   | 0.0959      | 224.33997   | 35.60491    | 6.90776  |

Totals : 3247.65263 158.80720

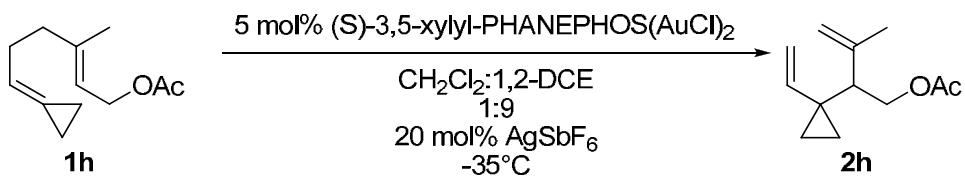

*Initial*: 100°C (10 min) *Ramp 1*: 2°C/min to 130°C (5 min) *Ramp 2*: 5°C/min to 170°C

(20 min)

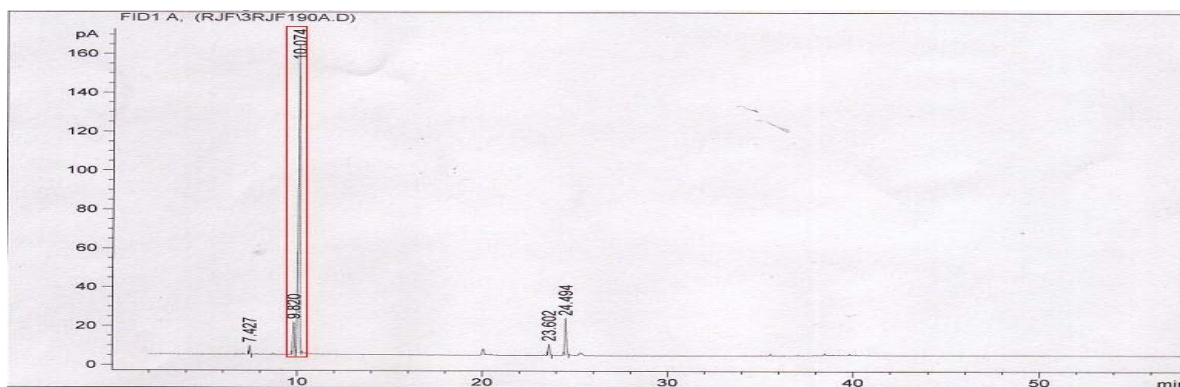

Signal 1: FID1 A,

| Peak #   | RetTime [min] | Type | Width [min] | Area [pA*s] | Height [pA] | Area %   |
|----------|---------------|------|-------------|-------------|-------------|----------|
| 1        | 7.427         | PB   | 0.0673      | 19.44063    | 4.56688     | 1.63949  |
| 2        | 9.820         | BV   | 0.0882      | 93.14408    | 16.30516    | 7.85512  |
| 3        | 10.074        | VB   | 0.0909      | 929.99030   | 158.30988   | 78.42885 |
| 4        | 23.602        | BB   | 0.0912      | 32.36367    | 5.68944     | 2.72932  |
| 5        | 24.494        | BB   | 0.0937      | 110.83716   | 18.77416    | 9.34723  |
| Totals : |               |      |             | 1185.77584  | 203.64552   |          |

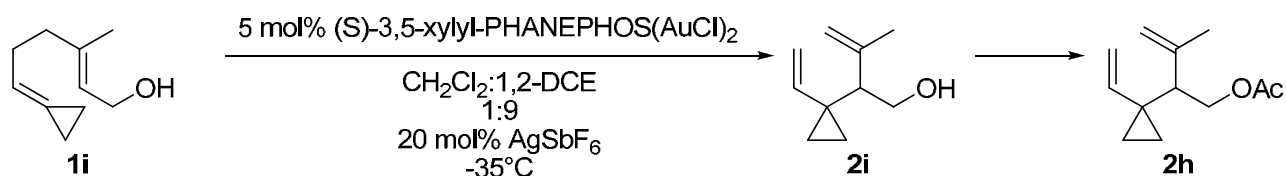

*Initial: 100°C (10 min) Ramp 1: 2°C/min to 130°C (5 min) Ramp 2: 5°C/min to 170°C*

(20 min)

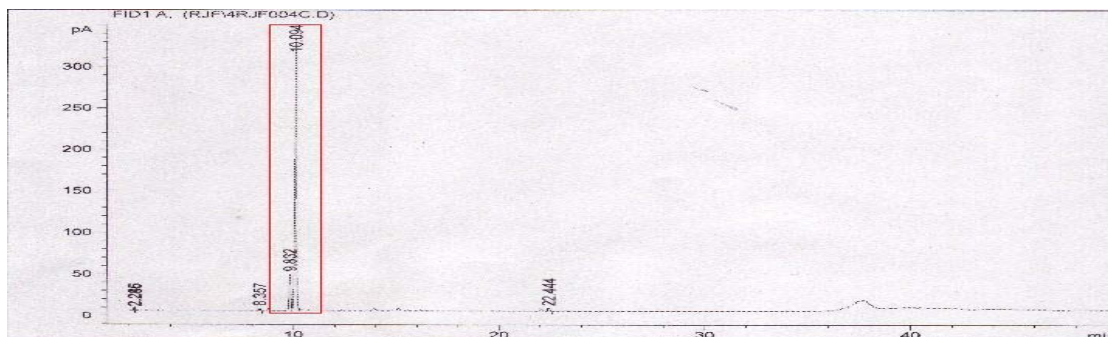

Signal 1: FID1 A,

| Peak #   | RetTime [min] | Type | Width [min] | Area [pA*s] | Height [pA] | Area %   |
|----------|---------------|------|-------------|-------------|-------------|----------|
| 1        | 2.246         | PV   | 0.0280      | 3.91561     | 2.11341     | 0.17742  |
| 2        | 2.285         | VB   | 0.0213      | 2.41829     | 1.70988     | 0.10957  |
| 3        | 8.357         | BB   | 0.0712      | 13.81585    | 2.91884     | 0.62600  |
| 4        | 9.832         | BV   | 0.0930      | 261.71375   | 43.74424    | 11.85830 |
| 5        | 10.094        | VB   | 0.0872      | 1906.02380  | 327.19940   | 86.36231 |
| 6        | 22.444        | BB   | 0.0893      | 19.12160    | 3.37252     | 0.86640  |
| Totals : |               |      |             | 2207.00889  | 381.05829   |          |

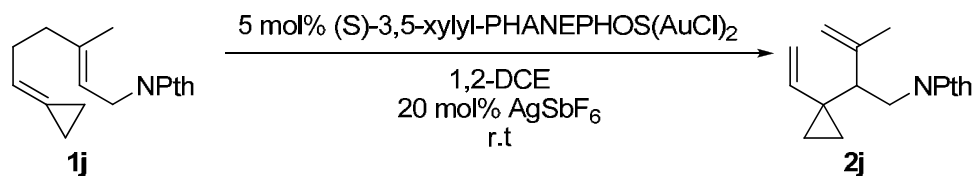

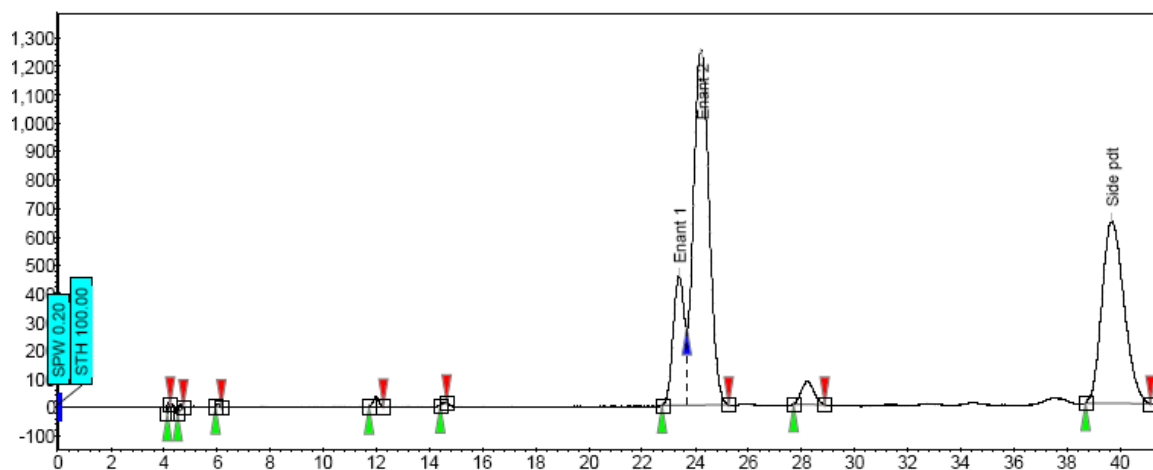

| Index | Name     | Start Time |       |       | End  | RT Offset | Quantity | Height | Area    |          |
|-------|----------|------------|-------|-------|------|-----------|----------|--------|---------|----------|
|       |          | [Min]      | [Min] | [Min] |      |           |          |        | [Min]   | [μV.Min] |
| 1     | UNKNOWN  | 4.13       | 4.15  | 4.24  | 0.00 | 0.10      | 30.0     | 1.7    | 0.098   |          |
| 2     | UNKNOWN  | 4.52       | 4.59  | 4.73  | 0.00 | 0.17      | 22.3     | 2.9    | 0.165   |          |
| 3     | UNKNOWN  | 5.95       | 6.04  | 6.16  | 0.00 | 0.05      | 8.0      | 0.9    | 0.050   |          |
| 4     | UNKNOWN  | 11.72      | 11.96 | 12.25 | 0.00 | 0.46      | 34.2     | 8.0    | 0.458   |          |
| 5     | UNKNOWN  | 14.39      | 14.53 | 14.63 | 0.00 | 0.04      | 5.4      | 0.8    | 0.044   |          |
| 6     | Enant 1  | 22.76      | 23.39 | 23.69 | 0.00 | 12.77     | 457.0    | 224.0  | 12.774  |          |
| 7     | Enant 2  | 23.69      | 24.22 | 25.25 | 0.00 | 48.72     | 1253.8   | 854.1  | 48.716  |          |
| 8     | UNKNOWN  | 27.71      | 28.22 | 28.87 | 0.00 | 2.49      | 80.4     | 43.7   | 2.492   |          |
| 9     | Side pdt | 38.68      | 39.68 | 41.13 | 0.00 | 35.20     | 644.0    | 617.2  | 35.203  |          |
| Total |          |            |       |       |      | 100.00    | 2535.0   | 1753.2 | 100.000 |          |

## 6. Quantum Calculations and Discussion

**Supplementary Table 6.** Gas phase free energies (enthalpies in parentheses) for thermal [3,3]-sigmatropic rearrangements of hexadienes at various levels of theory.<sup>a</sup>

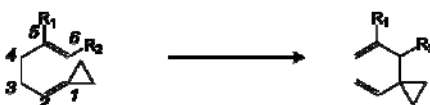

| Entry | R <sub>1</sub> | R <sub>2</sub> | $\Delta G^\ddagger$ ( $\Delta H^\ddagger$ ) | $\Delta G$ ( $\Delta H$ ) |
|-------|----------------|----------------|---------------------------------------------|---------------------------|
| 1     | H              | H              | 35.6 (32.4)                                 | -4.1 (-4.9)               |
|       |                |                | 33.4 (30.1)                                 | -7.3 (-8.4)               |
|       |                |                | 25.9 (22.4)                                 | -9.1 (-10.1)              |
| 2     | Me             | H              | 35.1 (31.9)                                 | -2.9 (-2.9)               |
|       |                |                | 32.0 (29.5)                                 | -7.0 (-7.5)               |
|       |                |                | 24.2 (20.3)                                 | -8.2 (-9.8)               |
| 3     | H              | Me             | 39.5 (36.2)                                 | 0.9 (-0.3)                |
|       |                |                | 36.1 (32.4)                                 | -4.4 (-6.0)               |
|       |                |                | 29.0 (24.1)                                 | -7.0 (-8.5)               |
| 4     | Me             | Me             | 38.8 (35.3)                                 | 3.2 (-0.5)                |
|       |                |                | 35.1 (30.1)                                 | -3.8 (-6.2)               |
|       |                |                | 25.5 (21.1)                                 | -5.4 (-8.3)               |

<sup>a</sup> B3LYP/6-31G(d) (BLACK), M06-2X/6-31G(d) (BLUE), and MP2/6-31G(d) (RED).

Cope reactions of several model compounds were studied using density functional theory (M06-2X<sup>15a,b</sup> and B3LYP<sup>12c-e</sup>) and Møller-Plesset perturbation theory (MP2)<sup>12f</sup> as implemented in *GAUSSIAN09*<sup>16</sup> with the 6-31G(d) basis set as shown in Supplementary Table 6. First, rearrangement in the absence of catalyst was examined. As shown in Supplementary Table 6, the M06-2X and B3LYP methods predict similar rearrangement

<sup>15</sup> Also, UB3LYP calculations were performed with the guess= (mix,always) keyword and show S<sup>2</sup> value of 0, eliminating the possibility of lower lying diradical-like pathway. (a) Zhao, Y.; Thrular, D. G. *Theor. Chem. Acc.* **2008**, *120*, 215. (b) Zhao, Y.; Thrular, D. G. *Acc. Chem. Res.* **2008**, *41*, 157. (c) Becke, A. D. *J. Chem. Phys.* **1993**, *98*, 5468. (d) Becke, A. D. *J. Chem. Phys.* **1993**, *98*, 1372. (e) Lee, C.; Yang, W.; Parr, R. G. *Phys. Rev. B.* **1988**, *98*, 785. (f) Binkley, J. S.; Pople, J. A. *Int. J. Quantum Chem.* **1975**, *9*, 229.

<sup>16</sup> Gaussian 09, Revision B.01, M. J. Frisch, G. W. Trucks, H. B. Schlegel, G. E. Scuseria, M. A. Robb, J. R. Cheeseman, G. Scalmani, V. Barone, B. Mennucci, G. A. Petersson, H. Nakatsuji, M. Caricato, X. Li, H. P. Hratchian, A. F. Izmaylov, J. Bloino, G. Zheng, J. L. Sonnenberg, M. Hada, M. Ehara, K. Toyota, R. Fukuda, J. Hasegawa, M. Ishida, T. Nakajima, Y. Honda, O. Kitao, H. Nakai, T. Vreven, J. A. Montgomery, Jr., J. E. Peralta, F. Ogliaro, M. Bearpark, J. J. Heyd, E. Brothers, K. N. Kudin, V. N. Staroverov, T. Keith, R. Kobayashi, J. Normand, K. Raghavachari, A. Rendell, J. C. Burant, S. S. Iyengar, J. Tomasi, M. Cossi, N. Rega, J. M. Millam, M. Klene, J. E. Knox, J. B. Cross, V. Bakken, C. Adamo, J. Jaramillo, R. Gomperts, R. E. Stratmann, O. Yazyev, A. J. Austin, R. Cammi, C. Pomelli, J. W. Ochterski, R. L. Martin, K. Morokuma, V. G. Zakrzewski, G. A. Voth, P. Salvador, J. J. Dannenberg, S. Dapprich, A. D. Daniels, O. Farkas, J. B. Foresman, J. V. Ortiz, J. Cioslowski, and D. J. Fox, Gaussian, Inc., Wallingford CT, 2010..

barriers while MP2 appears to underestimate the barriers.<sup>17</sup> In contrast, M06-2X and MP2 predict comparable exergonicities and exothermicities while B3LYP underestimates these. Thus, it appears that M06-2X provides the best estimates of both kinetic *and* thermodynamic parameters for these systems.

The rearrangement of the unsubstituted system (entry 1) is predicted to have a barrier ( $\Delta H^\ddagger$ ) of approximately 30 kcal/mol, comparable to that for the Cope reaction of 1,5-hexadiene, and is predicted to be exothermic/exergonic by 7-8 kcal/mol, reflecting the release of strain upon rearrangement.<sup>18</sup> As expected, methyl substitution at the C5 position (R<sub>1</sub>) only slightly changes this thermodynamic preference, but greater effects are predicted for alkyl substitution at the C6 position (entries 3 and 4). In sum, this strain relief allows the Cope-like rearrangement of methylenecyclopropane containing dienes, here catalyzed by Au(I) species, to proceed (*vide infra*).

**Supplementary Table 7.** Comparison of different functionals for calculated reaction pathways for the Au(I)-catalyzed rearrangement of the substrate corresponding to entry 4 in Table 3 in the main text. Free energies (kcal/mol, at 298 K) are shown. All structures were optimized without constraints using the 6-31G(d) basis set for P, C and H and LANL2DZ for Au, in DCE (using the CPCM solvation model). The ligand (L) was modeled as trimethylphosphine.

---

<sup>17</sup> A known tendency; see, for example: Wiest, O.; Montiel, D. C.; Houk, K. N. *J. Phys. Chem. A* **1997**, *101*, 8378.

<sup>18</sup> Previous calculations have predicted an 11-12 kcal/mol strain energy for the methylene cyclopropane substructure; see: (a) Johnson, W. T. G.; Borden, W. T. *J. Am. Chem. Soc.* **1997**, *119*, 5930. (b) Bach, R. D.; Dmitrenko, O. *J. Am. Chem. Soc.* **2004**, *126*, 4444.

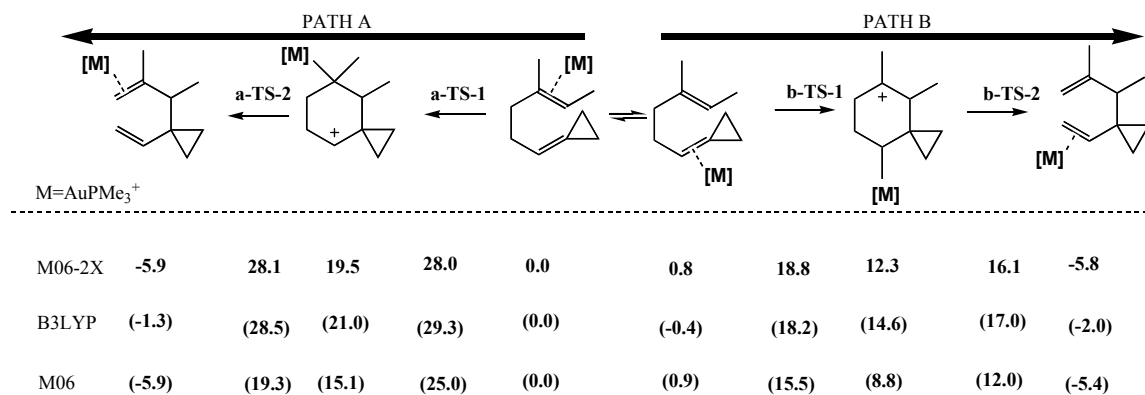

Next, the effect of gold on the rearrangement was examined with M06-2X, B3LYP, and M06 functionals using a split basis set (6-31G(d) for P, C and H and LANL2DZ for Au) in for 1,2-dichloroethane (DCE) solvent (CPCM<sup>19</sup> model) with PMe<sub>3</sub> as a simple model ligand). Recent literature indicates that M06 is appropriate for treatment of organometallic systems.<sup>20</sup> As shown in Supplementary Table 7, the M06 and M06-2X functionals have similar energetics although M06 energies are ca. 3 kcal/mol lower. B3LYP predicts higher barriers and lower thermodynamic drive than the aforementioned functionals. However, all three methods predict the Path B to be favored over Path A by ca. 10 kcal/mol and predict the reaction to be downhill by 2-5 kcal/mol.

<sup>19</sup> (a) Barone, V.; Cossi, M. *J. Phys. Chem. A* **1998**, *102*, 1995. (b) Barone, V.; Cossi, M.; Tomasi, J. *J. Comput. Chem.* **1998**, *19*, 404.

<sup>20</sup> (a) Sieffert, N.; B uhel, M. *Inorg. Chem.* **2009**, *48*, 4622. (b) Minenkov, Y.; Occhipinti, G.; Jensen, V. R. *J. Phys. Chem. A* **2009**, *113*, 11833. (c) Stewart, I. C.; Benitez, D.; O'leary, D. J.; Tkatchouk, E.; Day, M. W.; Goddard, W. A., III; Grubbs, R. H. *J. Am. Chem. Soc.* **2009**, *131*, 1931. (d) Benitez, D.; Tkatchouk, E.; Goddard, W. A., III. *Organometallics* **2009**, *28*, 2643. (e) Fedorov, A.; Couzijn, E. P. A.; Nagornova, N. S.; Boyarkin, O. V.; Rizzo, T. R.; Chen, P. *J. Am. Chem. Soc.* **2010**, *132*, 13789. (f) Takatani, T.; Sears, J. S.; Sherrill, C. D. *J. Phys. Chem. A* **2010**, *114*, 11714. (g) Pratt, L. M.; Voit, S.; Okeke, F. N. *J. Phys. Chem. A* **2011**, *115*, 2281. (h) Kulkarni, A. D.; Truhlar, D. G. *J. Chem. Theory Comput.* **2011**, *7*, 2325.

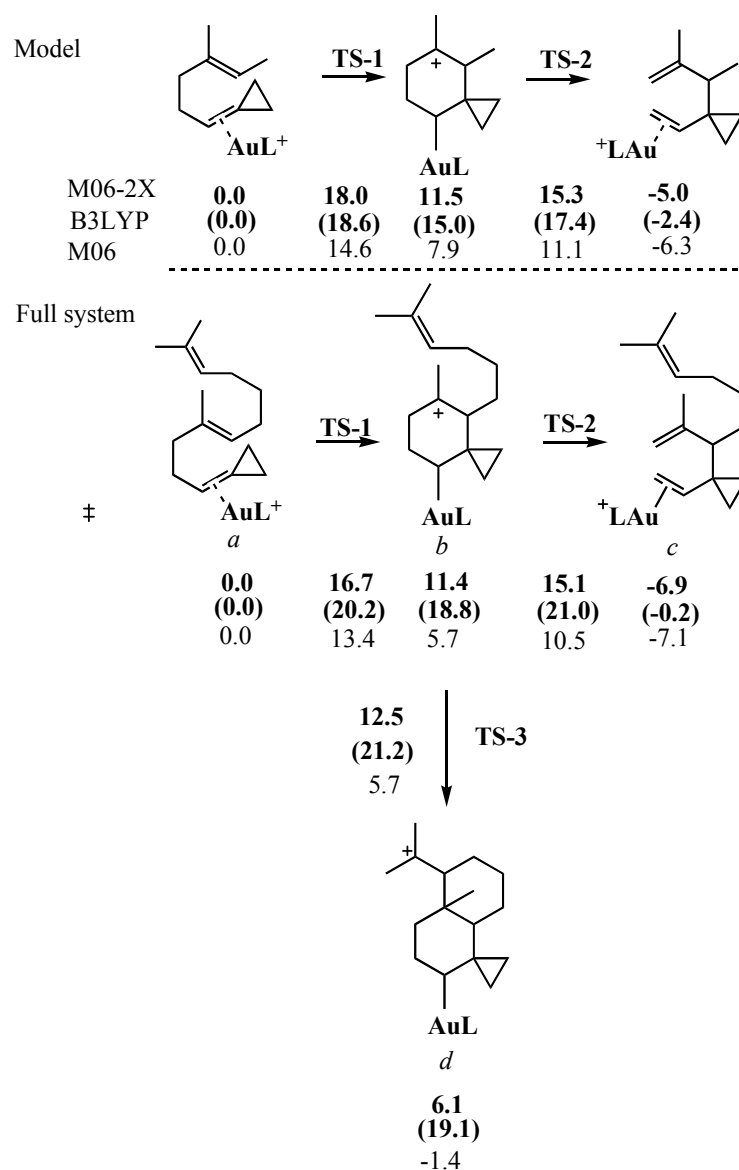

**Supplementary Figure 1.** Competing pathways for the Au(I)-catalyzed reaction of **1a**. Free energies (kcal/mol; 298K) were calculated with the indicated functionals (M06-2X, B3LYP, M06; from top to bottom). Trimethyl phosphine (L) was used as a model ligand. The 6-31G(d) basis set was used for P, C, H and LANL2DZ (ECP) for Au.

Next, we examined the effect of modeling the full substrate **1a** and the competing cyclization pathway as shown in Supplementary Figure 1. Only the lowest energy pathway (Path B) was calculated with full substrate given that Path A was much higher in energy. As shown in Supplementary Figure 1, the energetics are very similar for both the



model substrate and the model system with all three functionals. However, as discussed before B3LYP underestimates the exergonicities showing rearrangement to be only slightly exergonic in the full system (by 0.2 kcal/mol) while the M06 suite functionals both show the Cope-like rearrangement to be exergonic by ca. 7 kcal/mol. Given that substrate **1a** failed to undergo cyclization, we wondered if perhaps this was due to a kinetic preference for Cope-like rearrangement rather than cyclization. The barrier leading to cyclization (**TS-3**) is nearly the same or lower (within the M06 suite functionals) than energy to undergo the Cope-like rearrangement (**TS-2**). Although, the magnitude of exergonicities/endergonicities varies with the level of theory, there seems to be a thermodynamic preference leading to Cope-like product (*c*) than to cyclized product (*d*). This suggests the failure to cyclize and the preference to undergo the rearrangement is due to a thermodynamic preference.

As shown in Supplementary Figure 2 (below), formation of intermediate **A1**, which can proceed to the Cope-like product **D** or ring-open to form intermediate **A2**, is kinetically disfavored by over 10 kcal/mol with respect to formation of intermediate **B1**. Furthermore, although Au(I) can complex to the carbon bearing the cyclopropyl group (**C**), this is 20 kcal/mol higher in energy and the subsequent pathway way leading to the cyclobutene product **C3** proceeds through a high-energy transition state (**C-TS3**) that corresponds to a proton shift. Although we could not find transition state structures **C-TS1** and **C-TS2** due to convergence problems, the intermediates leading to the cyclobutene product are much higher in energy than those leading to the Cope product **E** and therefore we conclude that this pathway is kinetically unfeasible (but it cannot be ruled out, given that for one substrate [the naphthlimide substituted compound **1j**] some



amount of this product was observed). Calculations on this substrate are underway.

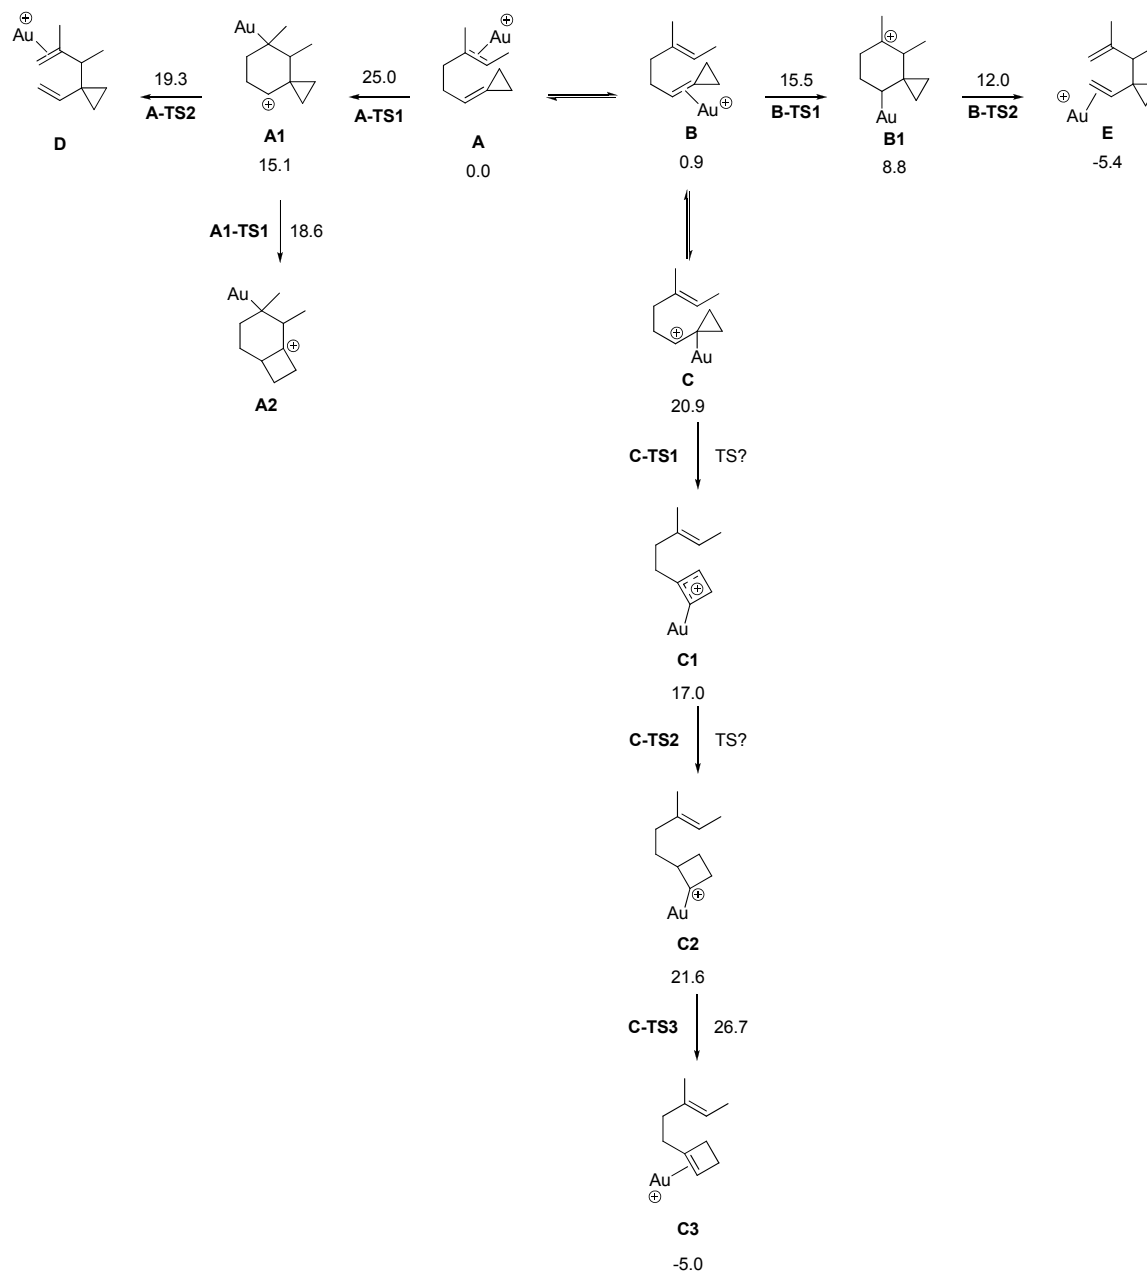

**Supplementary Figure 2.** Relative free energies (298.15K) calculated using M06/6-31G(d)-LANL2DZ(Au) in DCE (CPCM;UA0).

Coordinates and energies:

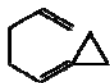

B3LYP/6-31G(d)

M06-2X/6-31G(d)

## XYZ Coordinates

|   |             |             |             |
|---|-------------|-------------|-------------|
| C | 3.67298700  | 0.89444800  | -0.19680900 |
| H | 4.63193000  | 1.08953500  | 0.27617100  |
| H | 3.36160300  | 1.59492200  | -0.96957800 |
| C | 2.91822300  | -0.15005100 | 0.14619500  |
| H | 3.27200300  | -0.82345600 | 0.92981900  |
| C | 1.57876700  | -0.48814400 | -0.44854000 |
| H | 1.33520300  | 0.21726400  | -1.25251100 |
| H | 1.62407000  | -1.48702700 | -0.90952800 |
| C | 0.44141000  | -0.48436600 | 0.60105000  |
| H | 0.72169100  | -1.16459700 | 1.42035300  |
| H | 0.35155400  | 0.51641800  | 1.03864700  |
| C | -1.96859600 | -0.15345100 | -0.01830600 |
| C | -0.88267800 | -0.91136900 | 0.02391200  |
| H | -0.92784900 | -1.91733200 | -0.39870400 |
| C | -2.60888400 | 1.13157400  | 0.30241800  |
| H | -2.86094700 | 1.35544200  | 1.33851000  |
| H | -2.35733500 | 2.01262700  | -0.28714800 |
| C | -3.39004000 | -0.00398100 | -0.39621400 |
| H | -4.14174200 | -0.53002200 | 0.17849000  |
| H | -3.63731400 | 0.12825900  | -1.44675400 |

|                                              |                             |
|----------------------------------------------|-----------------------------|
| Zero-point correction=                       | 0.176237 (Hartree/Particle) |
| Thermal correction to Energy=                | 0.185385                    |
| Thermal correction to Enthalpy=              | 0.186330                    |
| Thermal correction to Gibbs Free Energy=     | 0.141307                    |
| Sum of electronic and zero-point Energies=   | -311.809980                 |
| Sum of electronic and thermal Energies=      | -311.800831                 |
| Sum of electronic and thermal Enthalpies=    | -311.799887                 |
| Sum of electronic and thermal Free Energies= | -311.844910                 |

## XYZ Coordinates

|   |             |             |             |
|---|-------------|-------------|-------------|
| C | 3.61158800  | 0.92153000  | -0.18411000 |
| H | 4.56717100  | 1.12980200  | 0.28680400  |
| H | 3.26890400  | 1.62903800  | -0.93562300 |
| C | 2.89065400  | -0.14875100 | 0.13541000  |
| H | 3.26381300  | -0.83483800 | 0.89732500  |
| C | 1.55614000  | -0.49200400 | -0.45946300 |
| H | 1.29673500  | 0.23111400  | -1.24123700 |
| H | 1.60883600  | -1.47840100 | -0.94161900 |
| C | 0.44082300  | -0.52049500 | 0.60013300  |
| H | 0.73303200  | -1.21558600 | 1.39995000  |
| H | 0.34382300  | 0.47101600  | 1.05531500  |
| C | -1.94817200 | -0.16378600 | -0.01893100 |
| C | -0.87959600 | -0.93963600 | 0.01843400  |
| H | -0.93475600 | -1.93933400 | -0.41447300 |
| C | -2.54998900 | 1.13147300  | 0.31571300  |
| H | -2.79604500 | 1.34307500  | 1.35323200  |
| H | -2.26914300 | 2.00613300  | -0.26553300 |
| C | -3.34924800 | 0.03530100  | -0.39482700 |
| H | -4.12242300 | -0.47429900 | 0.17445600  |
| H | -3.59314400 | 0.19048600  | -1.44275000 |

|                                              |                             |
|----------------------------------------------|-----------------------------|
| Zero-point correction=                       | 0.178081 (Hartree/Particle) |
| Thermal correction to Energy=                | 0.187164                    |
| Thermal correction to Enthalpy=              | 0.188108                    |
| Thermal correction to Gibbs Free Energy=     | 0.143239                    |
| Sum of electronic and zero-point Energies=   | -311.648692                 |
| Sum of electronic and thermal Energies=      | -311.639608                 |
| Sum of electronic and thermal Enthalpies=    | -311.638664                 |
| Sum of electronic and thermal Free Energies= | -311.683533                 |

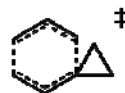

MP2/6-31G(d)

B3LYP/6-31G(d)

## XYZ Coordinates

|   |             |             |             |
|---|-------------|-------------|-------------|
| C | 3.58427000  | 0.94912300  | -0.17293400 |
| H | 4.54121700  | 1.16238700  | 0.29232100  |
| H | 3.21842700  | 1.67465400  | -0.89454700 |
| C | 2.88706400  | -0.15549000 | 0.12100100  |
| H | 3.28832100  | -0.85758700 | 0.85313600  |
| C | 1.55157800  | -0.49930500 | -0.46716000 |
| H | 1.28079400  | 0.23754400  | -1.23262000 |
| H | 1.60370200  | -1.47568000 | -0.96838200 |
| C | 0.44621100  | -0.54559900 | 0.60176600  |
| H | 0.74275900  | -1.25031000 | 1.39125400  |
| H | 0.35297200  | 0.44085900  | 1.06955900  |
| C | -1.94230100 | -0.16127700 | -0.01467900 |
| C | -0.87614300 | -0.95436500 | 0.02280200  |
| H | -0.94336400 | -1.95497100 | -0.40839200 |
| C | -2.53238000 | 1.14051900  | 0.31781900  |
| H | -2.78377800 | 1.35801200  | 1.35345100  |
| H | -2.24830000 | 2.01456500  | -0.26390900 |
| C | -3.34207400 | 0.04375600  | -0.39562200 |
| H | -4.12311900 | -0.45494300 | 0.17373500  |
| H | -3.58698200 | 0.20128800  | -1.44356200 |

|                                              |                             |
|----------------------------------------------|-----------------------------|
| Zero-point correction=                       | 0.179534 (Hartree/Particle) |
| Thermal correction to Energy=                | 0.188593                    |
| Thermal correction to Enthalpy=              | 0.189537                    |
| Thermal correction to Gibbs Free Energy=     | 0.144676                    |
| Sum of electronic and zero-point Energies=   | -310.681338                 |
| Sum of electronic and thermal Energies=      | -310.672279                 |
| Sum of electronic and thermal Enthalpies=    | -310.671335                 |
| Sum of electronic and thermal Free Energies= | -310.716196                 |

## XYZ Coordinates

|   |             |             |             |
|---|-------------|-------------|-------------|
| C | -0.86064900 | -0.20209100 | -0.16961700 |
| C | 0.02269200  | -1.24366800 | -0.49266100 |
| C | 1.22023700  | -1.37949500 | 0.26231000  |
| C | 2.19764400  | 0.16580600  | -0.03642800 |
| C | 1.31541700  | 1.23106300  | 0.28952000  |
| C | 0.15357600  | 1.40917700  | -0.48242500 |
| H | 1.90409500  | -2.17322000 | -0.04338900 |
| H | 0.02964300  | -1.59705300 | -1.52553800 |
| H | 2.44526900  | 0.04151200  | -1.09095600 |
| H | 3.07770300  | 0.03876500  | 0.59593500  |
| H | 1.29832200  | 1.57698700  | 1.32289400  |
| H | -0.54261600 | 2.19420400  | -0.18579600 |
| H | 1.11889000  | -1.33558800 | 1.34664200  |
| H | 0.24221000  | 1.32433200  | -1.56461300 |
| C | -2.31555100 | -0.01533300 | -0.43369900 |
| H | -2.65638400 | 0.93289100  | -0.84473700 |
| H | -2.90017300 | -0.87148700 | -0.76270300 |
| C | -1.77608800 | -0.00181200 | 0.99592300  |
| H | -1.98388800 | -0.86158600 | 1.62876900  |
| H | -1.77673900 | 0.94835700  | 1.52596000  |

|                                              |                             |
|----------------------------------------------|-----------------------------|
| Zero-point correction=                       | 0.175878 (Hartree/Particle) |
| Thermal correction to Energy=                | 0.183491                    |
| Thermal correction to Enthalpy=              | 0.184435                    |
| Thermal correction to Gibbs Free Energy=     | 0.144564                    |
| Sum of electronic and zero-point Energies=   | -311.756864                 |
| Sum of electronic and thermal Energies=      | -311.749251                 |
| Sum of electronic and thermal Enthalpies=    | -311.748307                 |
| Sum of electronic and thermal Free Energies= | -311.788178                 |

## MO6-2X/6-31G(d)

## XYZ Coordinates

|   |             |             |             |
|---|-------------|-------------|-------------|
| C | -0.84934700 | -0.21630700 | -0.18382500 |
| C | 0.04109500  | -1.23840800 | -0.51588900 |
| C | 1.21721100  | -1.36292800 | 0.26267300  |
| C | 2.17218900  | 0.18645600  | -0.02595000 |
| C | 1.27037600  | 1.22763500  | 0.29806500  |
| C | 0.13466600  | 1.39698100  | -0.50070700 |
| H | 1.92358400  | -2.14133200 | -0.02593200 |
| H | 0.06314700  | -1.58366700 | -1.54940300 |
| H | 2.42269200  | 0.06924300  | -1.07974900 |
| H | 3.04467000  | 0.06073600  | 0.61467400  |
| H | 1.22579900  | 1.56391800  | 1.33259600  |
| H | -0.58952800 | 2.16089400  | -0.21810300 |
| H | 1.08813800  | -1.30872100 | 1.34302300  |
| H | 0.24684000  | 1.29983600  | -1.57900700 |
| C | -2.30133000 | -0.01854400 | -0.41067900 |
| H | -2.64162400 | 0.93337500  | -0.80910100 |
| H | -2.89528600 | -0.87193900 | -0.72254200 |
| C | -1.72799700 | -0.01463000 | 0.99919600  |
| H | -1.92647800 | -0.87772600 | 1.62742400  |
| H | -1.70313200 | 0.93385300  | 1.52880900  |

|                                              |                             |
|----------------------------------------------|-----------------------------|
| Zero-point correction=                       | 0.177441 (Hartree/Particle) |
| Thermal correction to Energy=                | 0.184922                    |
| Thermal correction to Enthalpy=              | 0.185867                    |
| Thermal correction to Gibbs Free Energy=     | 0.146256                    |
| Sum of electronic and zero-point Energies=   | -311.599170                 |
| Sum of electronic and thermal Energies=      | -311.591689                 |
| Sum of electronic and thermal Enthalpies=    | -311.590745                 |
| Sum of electronic and thermal Free Energies= | -311.630356                 |

## MP2/6-31G(d)

## XYZ Coordinates

|   |             |             |             |
|---|-------------|-------------|-------------|
| C | -0.85924600 | -0.22222600 | -0.18632000 |
| C | 0.03958000  | -1.23731400 | -0.51211300 |
| C | 1.25674000  | -1.30296400 | 0.26460200  |
| C | 2.14190600  | 0.12095300  | -0.02849000 |
| C | 1.28309100  | 1.23589400  | 0.29677000  |
| C | 0.14719700  | 1.42392300  | -0.49801600 |
| H | 1.92531300  | -2.12502800 | -0.00511500 |
| H | 0.07534600  | -1.57639700 | -1.55006100 |
| H | 2.40735700  | 0.05932700  | -1.08644700 |
| H | 3.04327800  | 0.03738100  | 0.58387400  |
| H | 1.23748800  | 1.55421200  | 1.33877700  |
| H | -0.56604600 | 2.19940400  | -0.21674100 |
| H | 1.09042400  | -1.29518300 | 1.34388400  |
| H | 0.25312500  | 1.31329200  | -1.57573600 |
| C | -2.31490200 | -0.03972900 | -0.41261300 |
| H | -2.66571700 | 0.90722100  | -0.81558200 |
| H | -2.90491600 | -0.89897300 | -0.71962300 |
| C | -1.73568700 | -0.01771100 | 0.99972300  |
| H | -1.92392600 | -0.87596900 | 1.63943800  |
| H | -1.72379600 | 0.93575600  | 1.52207300  |

|                                              |                             |
|----------------------------------------------|-----------------------------|
| Zero-point correction=                       | 0.179443 (Hartree/Particle) |
| Thermal correction to Energy=                | 0.186705                    |
| Thermal correction to Enthalpy=              | 0.187650                    |
| Thermal correction to Gibbs Free Energy=     | 0.148420                    |
| Sum of electronic and zero-point Energies=   | -310.643847                 |
| Sum of electronic and thermal Energies=      | -310.636585                 |
| Sum of electronic and thermal Enthalpies=    | -310.635641                 |
| Sum of electronic and thermal Free Energies= | -310.674870                 |

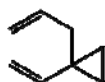

B3LYP/6-31G(d)

## XYZ Coordinates

|   |             |             |             |
|---|-------------|-------------|-------------|
| C | -3.00666100 | -0.40361300 | 0.55781100  |
| H | -2.83443700 | -1.05952500 | 1.40911900  |
| C | -2.07595100 | -0.21276900 | -0.37892000 |
| C | -0.71759600 | -0.86051500 | -0.38639500 |
| H | -0.68021400 | -1.63477800 | 0.39108500  |
| H | -0.58105700 | -1.38013000 | -1.34789700 |
| C | 0.48976700  | 0.07601300  | -0.18436100 |
| C | 2.79063300  | -0.73879900 | 0.48650000  |
| C | 1.79008200  | -0.63350400 | -0.38942800 |
| H | 1.89459600  | -1.11584500 | -1.36429700 |
| H | -3.97873900 | 0.07995600  | 0.50681800  |
| H | -2.30290900 | 0.44646500  | -1.21741200 |
| H | 2.73914400  | -0.29777100 | 1.47876300  |
| H | 3.70391400  | -1.27396900 | 0.24068400  |
| C | 0.41364100  | 1.52269000  | -0.64796200 |
| H | -0.50372900 | 1.88285900  | -1.10503100 |
| H | 1.31904800  | 1.96076100  | -1.05896600 |
| C | 0.39801900  | 1.19154800  | 0.82572700  |
| H | 1.27634400  | 1.44086600  | 1.41343000  |
| H | -0.54357400 | 1.30480100  | 1.35587000  |

|                                              |                             |
|----------------------------------------------|-----------------------------|
| Zero-point correction=                       | 0.176719 (Hartree/Particle) |
| Thermal correction to Energy=                | 0.185549                    |
| Thermal correction to Enthalpy=              | 0.186493                    |
| Thermal correction to Gibbs Free Energy=     | 0.142884                    |
| Sum of electronic and zero-point Energies=   | -311.817537                 |
| Sum of electronic and thermal Energies=      | -311.808707                 |
| Sum of electronic and thermal Enthalpies=    | -311.807762                 |
| Sum of electronic and thermal Free Energies= | -311.851371                 |

M06-2X/6-31G(d)

## XYZ Coordinates

|   |             |             |             |
|---|-------------|-------------|-------------|
| C | -2.93513000 | -0.35045200 | 0.59572900  |
| H | -2.71277700 | -0.90920100 | 1.50207800  |
| C | -2.05320200 | -0.26914800 | -0.39697500 |
| C | -0.69407700 | -0.90819700 | -0.37359800 |
| H | -0.65066900 | -1.64422500 | 0.43862200  |
| H | -0.54088500 | -1.46086400 | -1.31125900 |
| C | 0.47903800  | 0.06133100  | -0.19696700 |
| C | 2.77832800  | -0.66632600 | 0.51666500  |
| C | 1.80205900  | -0.60300500 | -0.38399600 |
| H | 1.94276900  | -1.08044400 | -1.35557900 |
| H | -3.90801000 | 0.12782600  | 0.53861600  |
| H | -2.31394400 | 0.29353900  | -1.29285700 |
| H | 2.67313300  | -0.22229000 | 1.50276100  |
| H | 3.71668600  | -1.16701900 | 0.30053200  |
| C | 0.35346500  | 1.48527000  | -0.68158200 |
| H | -0.57870300 | 1.80375500  | -1.13678900 |
| H | 1.24417900  | 1.94439700  | -1.09772100 |
| C | 0.35227900  | 1.18023800  | 0.79189900  |
| H | 1.22538600  | 1.46739000  | 1.36742000  |
| H | -0.59371600 | 1.26886400  | 1.31711800  |

|                                              |                             |
|----------------------------------------------|-----------------------------|
| Zero-point correction=                       | 0.178081 (Hartree/Particle) |
| Thermal correction to Energy=                | 0.187164                    |
| Thermal correction to Enthalpy=              | 0.188108                    |
| Thermal correction to Gibbs Free Energy=     | 0.143239                    |
| Sum of electronic and zero-point Energies=   | -311.648692                 |
| Sum of electronic and thermal Energies=      | -311.639608                 |
| Sum of electronic and thermal Enthalpies=    | -311.638664                 |
| Sum of electronic and thermal Free Energies= | -311.683533                 |

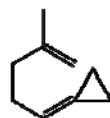

B3LYP/6-31G(d)

MP2/6-31G(d)

## XYZ Coordinates

|   |             |             |             |
|---|-------------|-------------|-------------|
| C | -2.91596400 | -0.40179500 | 0.59981100  |
| H | -2.67617500 | -0.99761000 | 1.47657100  |
| C | -2.04452700 | -0.26225200 | -0.40864600 |
| C | -0.67959800 | -0.88389000 | -0.42958200 |
| H | -0.62083500 | -1.66217500 | 0.34251600  |
| H | -0.52620800 | -1.38610800 | -1.39571900 |
| C | 0.48237100  | 0.08735700  | -0.20797100 |
| C | 2.74564000  | -0.73116300 | 0.52195900  |
| C | 1.80715500  | -0.55799600 | -0.41826000 |
| H | 1.99399800  | -0.93007500 | -1.42797000 |
| H | -3.89608800 | 0.06401300  | 0.57742600  |
| H | -2.33147100 | 0.33338800  | -1.27463700 |
| H | 2.59979700  | -0.39512700 | 1.54384000  |
| H | 3.68956800  | -1.21717500 | 0.29626500  |
| C | 0.34393600  | 1.53167800  | -0.62850400 |
| H | -0.59023800 | 1.86231600  | -1.07070400 |
| H | 1.22944800  | 2.01916700  | -1.02522100 |
| C | 0.34577300  | 1.16151100  | 0.83299000  |
| H | 1.21776700  | 1.42659000  | 1.42119300  |
| H | -0.59828900 | 1.22210000  | 1.36565900  |

|                                              |                             |
|----------------------------------------------|-----------------------------|
| Zero-point correction=                       | 0.179783 (Hartree/Particle) |
| Thermal correction to Energy=                | 0.188454                    |
| Thermal correction to Enthalpy=              | 0.189398                    |
| Thermal correction to Gibbs Free Energy=     | 0.146221                    |
| Sum of electronic and zero-point Energies=   | -310.697113                 |
| Sum of electronic and thermal Energies=      | -310.688442                 |
| Sum of electronic and thermal Enthalpies=    | -310.687498                 |
| Sum of electronic and thermal Free Energies= | -310.730675                 |

## XYZ Coordinates

|   |             |             |             |
|---|-------------|-------------|-------------|
| C | 2.97332700  | 1.48508700  | -0.16077100 |
| H | 3.94608100  | 1.73850500  | 0.25421200  |
| H | 2.40739700  | 2.30170900  | -0.60296200 |
| C | 2.49786200  | 0.23553200  | -0.13179200 |
| C | 1.13964100  | -0.10485400 | -0.70933300 |
| H | 0.75820800  | 0.74784100  | -1.28284200 |
| H | 1.24234900  | -0.94058400 | -1.41875700 |
| C | 0.08382100  | -0.49335900 | 0.35594800  |
| H | 0.45525800  | -1.35123000 | 0.93521200  |
| H | -0.04245800 | 0.33649700  | 1.06079600  |
| C | -2.37647100 | -0.19278900 | -0.04220300 |
| C | -1.24507400 | -0.84764000 | -0.25829200 |
| H | -1.25406500 | -1.69974700 | -0.94125200 |
| C | -3.07372500 | 0.90261700  | 0.64913200  |
| H | -3.27485800 | 0.81435400  | 1.71632600  |
| H | -2.91397300 | 1.92799400  | 0.31712700  |
| C | -3.81506100 | -0.05369500 | -0.30380300 |
| H | -4.50626800 | -0.77311800 | 0.13429500  |
| H | -4.14410800 | 0.34075500  | -1.26475400 |
| C | 3.28963200  | -0.90065500 | 0.47027900  |
| H | 4.26393900  | -0.56251300 | 0.83628400  |
| H | 2.75879200  | -1.36664000 | 1.31083800  |
| H | 3.45999200  | -1.69620000 | 0.26951500  |

|                                              |                             |
|----------------------------------------------|-----------------------------|
| Zero-point correction=                       | 0.219288 (Hartree/Particle) |
| Thermal correction to Energy=                | 0.215117                    |
| Thermal correction to Enthalpy=              | 0.216061                    |
| Thermal correction to Gibbs Free Energy=     | 0.167398                    |
| Sum of electronic and zero-point Energies=   | -351.100071                 |
| Sum of electronic and thermal Energies=      | -351.089534                 |
| Sum of electronic and thermal Enthalpies=    | -351.088590                 |
| Sum of electronic and thermal Free Energies= | -351.137254                 |

## M06-2X/6-31G(d)

## XYZ Coordinates

|   |             |             |             |
|---|-------------|-------------|-------------|
| C | 2.99486300  | 1.46746000  | -0.15962500 |
| H | 3.96242700  | 1.68616300  | 0.28400800  |
| H | 2.47637100  | 2.29234200  | -0.64045400 |
| C | 2.46930500  | 0.24351300  | -0.11938500 |
| C | 1.12864800  | -0.06185200 | -0.74102300 |
| H | 0.73450600  | 0.83459800  | -1.23186500 |
| H | 1.25649700  | -0.82485400 | -1.52318900 |
| C | 0.08848700  | -0.57249900 | 0.27273500  |
| H | 0.45633100  | -1.49976800 | 0.73170900  |
| H | -0.03198000 | 0.16365300  | 1.07556800  |
| C | -2.35089400 | -0.18245900 | -0.06843300 |
| C | -1.24159800 | -0.82985500 | -0.37717900 |
| H | -1.26896100 | -1.58364600 | -1.16533300 |
| C | -2.99959600 | 0.83263600  | 0.76847500  |
| H | -3.19332700 | 0.60512000  | 1.81369300  |
| H | -2.80194000 | 1.88249600  | 0.56735600  |
| C | -3.78115300 | 0.04292200  | -0.28560500 |
| H | -4.48889100 | -0.70292600 | 0.06720100  |
| H | -4.09772700 | 0.57398400  | -1.17971400 |
| C | 3.17892800  | -0.90532300 | 0.54878100  |
| H | 4.19014000  | -0.62527400 | 0.85385700  |
| H | 2.63802500  | -1.24176600 | 1.44085800  |
| H | 3.24659000  | -1.76737600 | -0.12612600 |

|                                              |                             |
|----------------------------------------------|-----------------------------|
| Zero-point correction=                       | 0.206277 (Hartree/Particle) |
| Thermal correction to Energy=                | 0.216020                    |
| Thermal correction to Enthalpy=              | 0.216964                    |
| Thermal correction to Gibbs Free Energy=     | 0.170489                    |
| Sum of electronic and zero-point Energies=   | -350.918737                 |
| Sum of electronic and thermal Energies=      | -350.908995                 |
| Sum of electronic and thermal Enthalpies=    | -350.908051                 |
| Sum of electronic and thermal Free Energies= | -350.954526                 |

## MP2/6-31G(d)

## XYZ Coordinates

|   |             |             |             |
|---|-------------|-------------|-------------|
| C | 2.90592200  | 1.50665800  | -0.16371500 |
| H | 3.86923900  | 1.78108800  | 0.25686400  |
| H | 2.32135800  | 2.30703000  | -0.60834600 |
| C | 2.45975300  | 0.24115100  | -0.14042400 |
| C | 1.11532000  | -0.12548600 | -0.71464700 |
| H | 0.70824100  | 0.72444300  | -1.27445500 |
| H | 1.23317300  | -0.95201700 | -1.43011900 |
| C | 0.09275800  | -0.53794500 | 0.35977900  |
| H | 0.47978900  | -1.39413200 | 0.92709900  |
| H | -0.03883100 | 0.28851700  | 1.06758100  |
| C | -2.34934600 | -0.20457500 | -0.03743200 |
| C | -1.23226900 | -0.89401900 | -0.24719400 |
| H | -1.25867500 | -1.75747300 | -0.91460000 |
| C | -3.00327300 | 0.92180300  | 0.63858800  |
| H | -3.20521200 | 0.85333100  | 1.70517800  |
| H | -2.81379100 | 1.93313100  | 0.28587800  |
| C | -3.78023500 | -0.02320000 | -0.29463900 |
| H | -4.49040400 | -0.70860700 | 0.16232100  |
| H | -4.09845900 | 0.37073300  | -1.25721600 |
| C | 3.26839800  | -0.87362000 | 0.46776700  |
| H | 4.24617800  | -0.51571200 | 0.80110200  |
| H | 2.75905800  | -1.31673500 | 1.33011600  |
| H | 3.42616800  | -1.67820700 | -0.25989900 |

|                                              |                             |
|----------------------------------------------|-----------------------------|
| Zero-point correction=                       | 0.208414 (Hartree/Particle) |
| Thermal correction to Energy=                | 0.218809                    |
| Thermal correction to Enthalpy=              | 0.219833                    |
| Thermal correction to Gibbs Free Energy=     | 0.171186                    |
| Sum of electronic and zero-point Energies=   | -349.823704                 |
| Sum of electronic and thermal Energies=      | -349.813229                 |
| Sum of electronic and thermal Enthalpies=    | -349.812285                 |
| Sum of electronic and thermal Free Energies= | -349.860932                 |



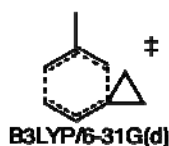

M06-2X/6-31G(d)

## XYZ Coordinates

|   |             |             |             |
|---|-------------|-------------|-------------|
| C | -1.12734800 | 0.20314700  | 0.10455900  |
| C | -0.61628600 | 1.50645500  | -0.03660400 |
| C | 0.66615300  | 1.66075800  | -0.64297700 |
| C | 1.85870000  | 0.76544100  | 0.38553400  |
| C | 1.35621600  | -0.57197700 | 0.46289200  |
| C | 0.13507800  | -0.73474000 | 1.15684400  |
| H | 1.05797000  | 2.67913900  | -0.68444000 |
| H | -0.92904600 | 2.25535400  | 0.69309700  |
| H | 1.83451000  | 1.34264300  | 1.30985400  |
| H | 2.80984600  | 0.89948700  | -0.13442900 |
| H | -0.28268500 | -1.74102400 | 1.21491900  |
| H | 0.80863500  | 1.14947100  | -1.59906900 |
| H | 0.01420400  | -0.18959600 | 2.09153100  |
| C | -2.52624500 | -0.26904500 | 0.31493700  |
| H | -2.71714300 | -1.01233800 | 1.08661100  |
| H | -3.34116300 | 0.43714400  | 0.17390500  |
| C | -1.73268600 | -0.72483000 | -0.90755800 |
| H | -2.00206900 | -0.30810300 | -1.87521800 |
| H | -1.42346600 | -1.76694800 | -0.94435300 |
| C | 1.75293300  | -1.55409800 | -0.60806900 |
| H | 1.37022600  | -1.24187000 | -1.59637900 |
| H | 2.84238800  | -1.63379900 | -0.70317600 |
| H | 1.35871200  | -2.55622100 | -0.41019800 |

|                                              |                             |
|----------------------------------------------|-----------------------------|
| Zero-point correction=                       | 0.203763 (Hartree/Particle) |
| Thermal correction to Energy=                | 0.212947                    |
| Thermal correction to Enthalpy=              | 0.213891                    |
| Thermal correction to Gibbs Free Energy=     | 0.170293                    |
| Sum of electronic and zero-point Energies=   | -351.047889                 |
| Sum of electronic and thermal Energies=      | -351.038705                 |
| Sum of electronic and thermal Enthalpies=    | -351.037761                 |
| Sum of electronic and thermal Free Energies= | -351.081359                 |

## XYZ Coordinates

|   |             |             |             |
|---|-------------|-------------|-------------|
| C | -1.09984000 | 0.24952900  | 0.11428800  |
| C | -0.55209700 | 1.52706000  | -0.03717900 |
| C | 0.71920400  | 1.61249700  | -0.66365200 |
| C | 1.87978400  | 0.69794800  | 0.37880100  |
| C | 1.31190800  | -0.60314600 | 0.47860800  |
| C | 0.11391200  | -0.70070900 | 1.20467100  |
| H | 1.16228900  | 2.60585100  | -0.73918400 |
| H | -0.84191800 | 2.30256400  | 0.67082900  |
| H | 1.88606100  | 1.29531200  | 1.28938000  |
| H | 2.82343500  | 0.78072400  | -0.16277300 |
| H | -0.36206700 | -1.67926100 | 1.28066800  |
| H | 0.82543800  | 1.05485600  | -1.59839300 |
| H | 0.02555100  | -0.11804200 | 2.11933600  |
| C | -2.49742000 | -0.21525100 | 0.29092500  |
| H | -2.70707600 | -0.94538700 | 1.06792600  |
| H | -3.30157900 | 0.49077100  | 0.10939400  |
| C | -1.67011400 | -0.69127200 | -0.89389200 |
| H | -1.90848000 | -0.28685800 | -1.87315500 |
| H | -1.36097800 | -1.73309900 | -0.89795800 |
| C | 1.59202800  | -1.58584000 | -0.62163600 |
| H | 1.13923100  | -1.23679300 | -1.56634300 |
| H | 2.66496500  | -1.70393800 | -0.80106600 |
| H | 1.17093200  | -2.57159700 | -0.40426200 |

|                                              |                             |
|----------------------------------------------|-----------------------------|
| Zero-point correction=                       | 0.205981 (Hartree/Particle) |
| Thermal correction to Energy=                | 0.214805                    |
| Thermal correction to Enthalpy=              | 0.215749                    |
| Thermal correction to Gibbs Free Energy=     | 0.173263                    |
| Sum of electronic and zero-point Energies=   | -350.870773                 |
| Sum of electronic and thermal Energies=      | -350.861949                 |
| Sum of electronic and thermal Enthalpies=    | -350.861005                 |
| Sum of electronic and thermal Free Energies= | -350.903491                 |



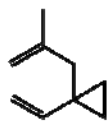

B3LYP/6-31G(d)

MP2/6-31G(d)

## XYZ Coordinates

|   |             |             |             |
|---|-------------|-------------|-------------|
| C | -1.13403100 | 0.24995700  | 0.10360600  |
| C | -0.57381700 | 1.51715400  | -0.03009900 |
| C | 0.73996200  | 1.59155200  | -0.63509100 |
| C | 1.82661100  | 0.76295200  | 0.34620600  |
| C | 1.33666300  | -0.59826400 | 0.47940300  |
| C | 0.15547000  | -0.73912900 | 1.21694300  |
| H | 1.13052400  | 2.60836200  | -0.73397900 |
| H | -0.85351500 | 2.28530700  | 0.69403600  |
| H | 1.84527400  | 1.31961400  | 1.28613800  |
| H | 2.79881200  | 0.84826100  | -0.14846400 |
| H | -0.30240600 | -1.72703100 | 1.28855700  |
| H | 0.80434300  | 1.07655100  | -1.59929400 |
| H | 0.04007900  | -0.14601800 | 2.12185100  |
| C | -2.52815700 | -0.22366200 | 0.28396100  |
| H | -2.73519400 | -0.95091600 | 1.06555000  |
| H | -3.34273400 | 0.47059400  | 0.09568600  |
| C | -1.68943500 | -0.70536400 | -0.89795600 |
| H | -1.93061200 | -0.31577100 | -1.88387900 |
| H | -1.37529200 | -1.74568900 | -0.89252500 |
| C | 1.65295300  | -1.56673300 | -0.62242300 |
| H | 1.22355000  | -1.22685600 | -1.57927900 |
| H | 2.73344500  | -1.66679000 | -0.76980700 |
| H | 1.24641500  | -2.56040200 | -0.41188300 |

|                                              |                             |
|----------------------------------------------|-----------------------------|
| Zero-point correction=                       | 0.208175 (Hartree/Particle) |
| Thermal correction to Energy=                | 0.216889                    |
| Thermal correction to Enthalpy=              | 0.217833                    |
| Thermal correction to Gibbs Free Energy=     | 0.175402                    |
| Sum of electronic and zero-point Energies=   | -349.789615                 |
| Sum of electronic and thermal Energies=      | -349.780901                 |
| Sum of electronic and thermal Enthalpies=    | -349.779957                 |
| Sum of electronic and thermal Free Energies= | -349.822388                 |

## XYZ Coordinates

|   |             |             |             |
|---|-------------|-------------|-------------|
| C | 2.39951400  | 0.81211200  | -0.99530400 |
| H | 1.91733600  | 1.32955600  | -1.82135300 |
| C | 1.79680300  | -0.18794500 | -0.34203500 |
| C | 0.39621700  | -0.64637000 | -0.70037600 |
| H | 0.20960200  | -0.46894500 | -1.76690000 |
| H | 0.33763100  | -1.73510400 | -0.55644300 |
| C | -0.76999600 | -0.00419400 | 0.08421400  |
| C | -3.19919700 | -0.40109000 | -0.51491400 |
| C | -2.02661400 | -0.80905700 | -0.02688800 |
| H | -1.93647700 | -1.83977100 | 0.32441500  |
| H | 3.40280900  | 1.14245500  | -0.73675300 |
| H | -3.34783600 | 0.60542100  | -0.89772900 |
| H | -4.05905700 | -1.06474000 | -0.54920400 |
| C | -0.52585400 | 0.70599500  | 1.40831000  |
| H | 0.48927400  | 0.77719400  | 1.78688100  |
| H | -1.28853000 | 0.60594700  | 2.17586800  |
| C | -0.86479300 | 1.49831900  | 0.17031400  |
| H | -1.84290000 | 1.96566300  | 0.10895200  |
| H | -0.06233700 | 2.07563000  | -0.28058600 |
| C | 2.49050900  | -0.95077700 | 0.76156400  |
| H | 2.67416600  | -1.98909100 | 0.45115200  |
| H | 3.45329200  | -0.50193600 | 1.02552700  |
| H | 1.87349900  | -1.00423400 | 1.66686300  |

|                                              |                             |
|----------------------------------------------|-----------------------------|
| Zero-point correction=                       | 0.205086 (Hartree/Particle) |
| Thermal correction to Energy=                | 0.215233                    |
| Thermal correction to Enthalpy=              | 0.216178                    |
| Thermal correction to Gibbs Free Energy=     | 0.169685                    |
| Sum of electronic and zero-point Energies=   | -351.106420                 |
| Sum of electronic and thermal Energies=      | -351.096273                 |
| Sum of electronic and thermal Enthalpies=    | -351.095328                 |
| Sum of electronic and thermal Free Energies= | -351.141821                 |

## M06-2X/6-31G(d)

## XYZ Coordinates

|   |             |             |             |
|---|-------------|-------------|-------------|
| C | 2.36510000  | 0.88451400  | -0.91110200 |
| H | 1.88289500  | 1.45354500  | -1.70194400 |
| C | 1.77275100  | -0.17389000 | -0.35707600 |
| C | 0.38560800  | -0.61334200 | -0.76131700 |
| H | 0.19678000  | -0.35977600 | -1.81085200 |
| H | 0.32619600  | -1.70808200 | -0.68666600 |
| C | -0.75434900 | -0.01604600 | 0.07642100  |
| C | -3.18095600 | -0.34873100 | -0.50217200 |
| C | -2.01936700 | -0.80054800 | -0.03893300 |
| H | -1.94462900 | -1.84082100 | 0.28350900  |
| H | 3.35526000  | 1.20986000  | -0.60402400 |
| H | -3.29682800 | 0.67257300  | -0.85410700 |
| H | -4.05771800 | -0.98679200 | -0.54865800 |
| C | -0.47205800 | 0.62732500  | 1.41426700  |
| H | 0.55466800  | 0.68115200  | 1.76146500  |
| H | -1.21707300 | 0.49681400  | 2.19240000  |
| C | -0.83865900 | 1.47301900  | 0.22797700  |
| H | -1.81593200 | 1.94298800  | 0.21697500  |
| H | -0.04159000 | 2.06085000  | -0.21697300 |
| C | 2.44515100  | -1.01309100 | 0.69719300  |
| H | 2.69249300  | -2.00068100 | 0.28834500  |
| H | 3.36764400  | -0.55202100 | 1.05928000  |
| H | 1.77850400  | -1.18486900 | 1.54970100  |

Zero-point correction= 0.207282 (Hartree/Particle)  
 Thermal correction to Energy= 0.217204  
 Thermal correction to Enthalpy= 0.218148  
 Thermal correction to Gibbs Free Energy= 0.172470  
 Sum of electronic and zero-point Energies= -350.930908  
 Sum of electronic and thermal Energies= -350.920986  
 Sum of electronic and thermal Enthalpies= -350.920041  
 Sum of electronic and thermal Free Energies= -350.965719

## MP2/6-31G(d)

## XYZ Coordinates

|   |             |             |             |
|---|-------------|-------------|-------------|
| C | 2.39951400  | 0.81211200  | -0.99530400 |
| H | 1.91733600  | 1.32955600  | -1.82135300 |
| C | 1.79680300  | -0.18794500 | -0.34203500 |
| C | 0.39621700  | -0.64637000 | -0.70037600 |
| H | 0.20960200  | -0.46894500 | -1.76690000 |
| H | 0.33763100  | -1.73510400 | -0.55644300 |
| C | -0.76999600 | -0.00419400 | 0.08421400  |
| C | -3.19919700 | -0.40109000 | -0.51491400 |
| C | -2.02661400 | -0.80905700 | -0.02688800 |
| H | -1.93647700 | -1.83977100 | 0.32441500  |
| H | 3.40280900  | 1.14245500  | -0.73675300 |
| H | -3.34783600 | 0.60542100  | -0.89772900 |
| H | -4.05905700 | -1.06474000 | -0.54920400 |
| C | -0.52585400 | 0.70599500  | 1.40831000  |
| H | 0.48927400  | 0.77719400  | 1.78688100  |
| H | -1.28853000 | 0.60594700  | 2.17586800  |
| C | -0.86479300 | 1.49831900  | 0.17031400  |
| H | -1.84290000 | 1.96566300  | 0.10895200  |
| H | -0.06233700 | 2.07563000  | -0.28058600 |
| C | 2.49050900  | -0.95077700 | 0.76156400  |
| H | 2.67416600  | -1.98909100 | 0.45115200  |
| H | 3.45329200  | -0.50193600 | 1.02552700  |
| H | 1.87349900  | -1.00423400 | 1.66686300  |

Zero-point correction= 0.205686 (Hartree/Particle)  
 Thermal correction to Energy= 0.215233  
 Thermal correction to Enthalpy= 0.216178  
 Thermal correction to Gibbs Free Energy= 0.169685  
 Sum of electronic and zero-point Energies= -351.106420  
 Sum of electronic and thermal Energies= -351.096273  
 Sum of electronic and thermal Enthalpies= -351.095328  
 Sum of electronic and thermal Free Energies= -351.141821

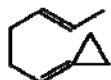

B3LYP/6-31G(d)

## XYZ Coordinates

|   |             |             |             |
|---|-------------|-------------|-------------|
| C | 3.10601400  | 0.43440600  | -0.38965800 |
| H | 2.77760100  | 1.06721900  | -1.21695200 |
| C | 2.27553900  | -0.50851700 | 0.06361300  |
| C | 0.89202700  | -0.77613900 | -0.46264900 |
| H | 0.68511700  | -0.12971800 | -1.32464500 |
| C | -0.20744900 | -0.56807000 | 0.60693500  |
| H | 0.03507000  | -1.19290000 | 1.48062100  |
| H | -0.19089500 | 0.47291900  | 0.94949500  |
| C | -2.59595500 | -0.07094700 | 0.01373200  |
| C | -1.58261900 | -0.91990800 | 0.10343200  |
| H | -1.73267100 | -1.95163400 | -0.22174500 |
| C | -3.10620300 | 1.29238100  | 0.22569900  |
| H | -3.30546400 | 1.63327600  | 1.24120800  |
| H | -2.79363500 | 2.08808000  | -0.44982900 |
| C | -3.99869800 | 0.17473500  | -0.34595000 |
| H | -4.78770600 | -0.22260200 | 0.29195600  |
| H | -4.27470800 | 0.23352000  | -1.39843800 |
| C | 4.48407400  | 0.70789100  | 0.14250400  |
| H | 5.24602800  | 0.58623100  | -0.63963900 |
| H | 4.57346400  | 1.74026400  | 0.50767100  |
| H | 4.73759800  | 0.03435300  | 0.96833600  |
| H | 2.60081100  | -1.14085500 | 0.89370100  |

|                                              |                             |
|----------------------------------------------|-----------------------------|
| Zero-point correction=                       | 0.204542 (Hartree/Particle) |
| Thermal correction to Energy=                | 0.215199                    |
| Thermal correction to Enthalpy=              | 0.216143                    |
| Thermal correction to Gibbs Free Energy=     | 0.167359                    |
| Sum of electronic and zero-point Energies=   | -351.101082                 |
| Sum of electronic and thermal Energies=      | -351.090426                 |
| Sum of electronic and thermal Enthalpies=    | -351.089482                 |
| Sum of electronic and thermal Free Energies= | -351.138265                 |

M06-2X/6-31G(d)

## XYZ Coordinates

|   |             |             |             |
|---|-------------|-------------|-------------|
| C | 3.07551300  | 0.43180300  | -0.39758500 |
| H | 2.74562400  | 1.04629000  | -1.23671800 |
| C | 2.25600400  | -0.50992700 | 0.06502600  |
| C | 0.87979600  | -0.79118900 | -0.46352100 |
| H | 0.66903700  | -0.14898000 | -1.32653700 |
| C | -0.20626200 | -0.57888200 | 0.60589400  |
| H | 0.03961200  | -1.19588400 | 1.48178900  |
| H | -0.19530000 | 0.46545200  | 0.93623500  |
| C | -2.57631700 | -0.07675900 | 0.01207100  |
| C | -1.57598700 | -0.93494400 | 0.10164000  |
| H | -1.72980200 | -1.96415100 | -0.22574300 |
| C | -3.05676800 | 1.29211600  | 0.22941800  |
| H | -3.24836800 | 1.62531700  | 1.24632900  |
| H | -2.72505400 | 2.07769500  | -0.44483300 |
| C | -3.96848000 | 0.20363500  | -0.34444900 |
| H | -4.75972200 | -0.17900800 | 0.29525700  |
| H | -4.23677300 | 0.27409300  | -1.39555400 |
| C | 4.44321800  | 0.72171000  | 0.14583400  |
| H | 5.21160000  | 0.59021900  | -0.62438500 |
| H | 4.51825400  | 1.75719400  | 0.49689400  |
| H | 4.68365100  | 0.06021600  | 0.98296900  |
| H | 2.58103600  | -1.12421700 | 0.90796700  |
| H | 0.82190100  | -1.82961900 | -0.81963300 |

|                                              |                             |
|----------------------------------------------|-----------------------------|
| Zero-point correction=                       | 0.206529 (Hartree/Particle) |
| Thermal correction to Energy=                | 0.217150                    |
| Thermal correction to Enthalpy=              | 0.218094                    |
| Thermal correction to Gibbs Free Energy=     | 0.169269                    |
| Sum of electronic and zero-point Energies=   | -350.917663                 |
| Sum of electronic and thermal Energies=      | -350.907042                 |
| Sum of electronic and thermal Enthalpies=    | -350.906098                 |
| Sum of electronic and thermal Free Energies= | -350.954924                 |

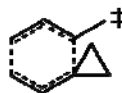

MP2/6-31G(d)

## XYZ Coordinates

|                                              |                             |             |             |
|----------------------------------------------|-----------------------------|-------------|-------------|
| C                                            | 3.03885900                  | 0.46534100  | -0.37755500 |
| H                                            | 2.67146100                  | 1.13675700  | -1.15524100 |
| C                                            | 2.24939700                  | -0.53846500 | 0.03119800  |
| C                                            | 0.86677200                  | -0.80015300 | -0.48516200 |
| H                                            | 0.64115900                  | -0.11521200 | -1.31137000 |
| C                                            | -0.20041600                 | -0.63345300 | 0.61052500  |
| H                                            | 0.05388300                  | -1.28601200 | 1.45752100  |
| H                                            | -0.17985800                 | 0.39741700  | 0.98151600  |
| C                                            | -2.56048000                 | -0.07131700 | 0.02010200  |
| C                                            | -1.57598300                 | -0.96022400 | 0.10882600  |
| H                                            | -1.75578400                 | -1.98543600 | -0.22033500 |
| C                                            | -3.00880700                 | 1.30895400  | 0.23751900  |
| H                                            | -3.20205600                 | 1.64850800  | 1.25262300  |
| H                                            | -2.66109500                 | 2.09058200  | -0.43423800 |
| C                                            | -3.94588600                 | 0.23609600  | -0.34429000 |
| H                                            | -4.75191300                 | -0.12476900 | 0.29056700  |
| H                                            | -4.21037200                 | 0.31689900  | -1.39621100 |
| C                                            | 4.41246200                  | 0.74245500  | 0.15497800  |
| H                                            | 5.16403900                  | 0.69324600  | -0.64062700 |
| H                                            | 4.47347800                  | 1.74531300  | 0.59190900  |
| H                                            | 4.68611500                  | 0.01766900  | 0.92690000  |
| H                                            | 2.61238600                  | -1.21107700 | 0.81159500  |
| H                                            | 0.80304900                  | -1.81929200 | -0.89144600 |
| Zero-point correction=                       | 0.208524 (Hartree/Particle) |             |             |
| Thermal correction to Energy=                | 0.219098                    |             |             |
| Thermal correction to Enthalpy=              | 0.220042                    |             |             |
| Thermal correction to Gibbs Free Energy=     | 0.171385                    |             |             |
| Sum of electronic and zero-point Energies=   | -349.822999                 |             |             |
| Sum of electronic and thermal Energies=      | -349.812425                 |             |             |
| Sum of electronic and thermal Enthalpies=    | -349.811481                 |             |             |
| Sum of electronic and thermal Free Energies= | -349.860138                 |             |             |

B3LYP/6-31G(d)

## XYZ Coordinates

|                                              |                             |             |             |
|----------------------------------------------|-----------------------------|-------------|-------------|
| C                                            | -0.57249700                 | -0.74099100 | -0.16830500 |
| C                                            | 0.59599700                  | -1.42718500 | -0.54204700 |
| C                                            | 1.77012000                  | -1.27229700 | 0.21477400  |
| C                                            | 2.23759100                  | 0.61497800  | -0.02574600 |
| C                                            | 1.06850400                  | 1.30617700  | 0.33512000  |
| C                                            | -0.11167000                 | 1.19247500  | -0.43077400 |
| H                                            | 2.67290800                  | -1.77701300 | -0.12898300 |
| H                                            | 0.69735900                  | -1.71405600 | -1.59064500 |
| H                                            | 2.49740300                  | 0.56445900  | -1.08135100 |
| H                                            | 3.11246200                  | 0.72029300  | 0.61537600  |
| H                                            | 1.67851000                  | -1.26066900 | 1.29902100  |
| H                                            | 0.03101700                  | 1.10478100  | -1.50822600 |
| C                                            | -1.99707200                 | -1.09383300 | -0.42474300 |
| H                                            | -2.68754100                 | -0.33422100 | -0.78405600 |
| H                                            | -2.21887000                 | -2.09213600 | -0.79614500 |
| C                                            | -1.47613300                 | -0.93930800 | 1.00337600  |
| H                                            | -1.33996300                 | -1.83498600 | 1.60563000  |
| H                                            | -1.83063900                 | -0.07937000 | 1.56741300  |
| C                                            | -1.30479300                 | 2.05749500  | -0.06801900 |
| H                                            | -2.24437000                 | 1.67517400  | -0.47887000 |
| H                                            | -1.41850500                 | 2.15242400  | 1.01784800  |
| H                                            | -1.17104800                 | 3.06859100  | -0.47290400 |
| H                                            | 0.96099800                  | 1.62166900  | 1.37407500  |
| Zero-point correction=                       | 0.203803 (Hartree/Particle) |             |             |
| Thermal correction to Energy=                | 0.213033                    |             |             |
| Thermal correction to Enthalpy=              | 0.213977                    |             |             |
| Thermal correction to Gibbs Free Energy=     | 0.170470                    |             |             |
| Sum of electronic and zero-point Energies=   | -351.042047                 |             |             |
| Sum of electronic and thermal Energies=      | -351.032817                 |             |             |
| Sum of electronic and thermal Enthalpies=    | -351.031873                 |             |             |
| Sum of electronic and thermal Free Energies= | -351.075380                 |             |             |

## M06-2X/6-31G(d)

## XYZ Coordinates

|   |             |             |             |
|---|-------------|-------------|-------------|
| C | -0.53874200 | -0.73860900 | -0.17513700 |
| C | 0.64170700  | -1.39834500 | -0.53636800 |
| C | 1.79551100  | -1.18922700 | 0.23593000  |
| C | 2.20036900  | 0.64810500  | -0.03750700 |
| C | 1.01873000  | 1.31560100  | 0.32251700  |
| C | -0.15079900 | 1.16177500  | -0.44266200 |
| H | 2.71759000  | -1.67655500 | -0.07820500 |
| H | 0.76032000  | -1.69610200 | -1.57833800 |
| H | 2.45229600  | 0.60462800  | -1.09521300 |
| H | 3.07604500  | 0.78858100  | 0.59448200  |
| H | 1.67359200  | -1.16986700 | 1.31724200  |
| H | -0.00877700 | 1.08304600  | -1.52081300 |
| C | -1.94839600 | -1.13146500 | -0.41948000 |
| H | -2.65943000 | -0.40005400 | -0.79165600 |
| H | -2.13418800 | -2.14282900 | -0.76818300 |
| C | -1.43007400 | -0.93841400 | 0.99716000  |
| H | -1.26691000 | -1.82034200 | 1.60950200  |
| H | -1.80310200 | -0.07485800 | 1.54141400  |
| C | -1.36745800 | 1.97933900  | -0.06081100 |
| H | -2.30555700 | 1.53165400  | -0.39884800 |
| H | -1.42284000 | 2.11644000  | 1.02375400  |
| H | -1.30382700 | 2.97286100  | -0.51644300 |
| H | 0.89969300  | 1.63083400  | 1.35944600  |

Zero-point correction= 0.205767 (Hartree/Particle)  
 Thermal correction to Energy= 0.214753  
 Thermal correction to Enthalpy= 0.215698  
 Thermal correction to Gibbs Free Energy= 0.172717  
 Sum of electronic and zero-point Energies= -350.864320  
 Sum of electronic and thermal Energies= -350.855334  
 Sum of electronic and thermal Enthalpies= -350.854390  
 Sum of electronic and thermal Free Energies= -350.897370

## MP2/6-31G(d)

## XYZ Coordinates

|   |             |             |             |
|---|-------------|-------------|-------------|
| C | -0.52636400 | -0.72412100 | -0.18538800 |
| C | 0.66188100  | -1.37726900 | -0.55749700 |
| C | 1.83770400  | -1.06980700 | 0.21130300  |
| C | 2.16878900  | 0.60146700  | -0.02066200 |
| C | 0.98469500  | 1.33392300  | 0.33784100  |
| C | -0.18389000 | 1.14644200  | -0.43412100 |
| H | 2.74611200  | -1.59288200 | -0.09920500 |
| H | 0.79083300  | -1.64141200 | -1.61008400 |
| H | 2.43449900  | 0.66193900  | -1.07794600 |
| H | 3.04550800  | 0.81274900  | 0.59682700  |
| H | 1.70106300  | -1.15389300 | 1.29114200  |
| H | -0.01948900 | 1.09078000  | -1.51239000 |
| C | -1.92963500 | -1.17474000 | -0.39848700 |
| H | -2.67956400 | -0.46660200 | -0.73804500 |
| H | -2.08478000 | -2.18728900 | -0.76078500 |
| C | -1.38156500 | -0.97840300 | 1.00946800  |
| H | -1.16437300 | -1.86051000 | 1.60595600  |
| H | -1.77676200 | -0.14097500 | 1.57827900  |
| C | -1.41169300 | 1.96063400  | -0.07780700 |
| H | -2.32988700 | 1.54100400  | -0.49534400 |
| H | -1.52747300 | 2.04258300  | 1.00681200  |
| H | -1.30816200 | 2.97400800  | -0.47891400 |
| H | 0.85293600  | 1.61174600  | 1.38580600  |

Zero-point correction= 0.208388 (Hartree/Particle)  
 Thermal correction to Energy= 0.217053  
 Thermal correction to Enthalpy= 0.217997  
 Thermal correction to Gibbs Free Energy= 0.175641  
 Sum of electronic and zero-point Energies= -349.782712  
 Sum of electronic and thermal Energies= -349.774047  
 Sum of electronic and thermal Enthalpies= -349.773103  
 Sum of electronic and thermal Free Energies= -349.815459



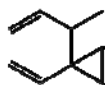

B3LYP/6-31G(d)

## XYZ Coordinates

|   |             |             |             |
|---|-------------|-------------|-------------|
| C | -2.79775900 | -0.54791600 | -0.96057000 |
| H | -2.58465700 | -0.33426500 | -2.00627100 |
| C | -1.97134800 | -0.16710400 | 0.01480400  |
| C | -0.69657300 | 0.61695700  | -0.18573200 |
| H | -0.61832900 | 0.85110300  | -1.25675200 |
| C | 0.59123100  | -0.16659500 | 0.18205600  |
| C | 2.74764000  | 0.26625000  | -1.05281900 |
| C | 1.85509300  | 0.58410700  | -0.11325500 |
| H | 2.03710000  | 1.46766300  | 0.49982200  |
| H | -3.72089300 | -1.08320000 | -0.75344300 |
| H | 2.61935100  | -0.59956900 | -1.69806600 |
| H | 3.64341100  | 0.86147700  | -1.20982700 |
| C | 0.60330900  | -1.04884100 | 1.41817000  |
| H | -0.30033100 | -1.13103200 | 2.01652900  |
| H | 1.52205000  | -1.08879600 | 1.99760500  |
| C | 0.61024800  | -1.67040000 | 0.04097200  |
| H | 1.52740200  | -2.14473500 | -0.29485800 |
| H | -0.29843800 | -2.15752000 | -0.29940100 |
| C | -0.79441800 | 1.94897300  | 0.58915100  |
| H | 0.06039600  | 2.60041400  | 0.38164800  |
| H | -1.70389100 | 2.48997100  | 0.30706400  |
| H | -0.82889400 | 1.77064600  | 1.67097400  |
| H | -2.23881500 | -0.39474400 | 1.04831200  |

|                                              |                             |
|----------------------------------------------|-----------------------------|
| Zero-point correction=                       | 0.204928 (Hartree/Particle) |
| Thermal correction to Energy=                | 0.215150                    |
| Thermal correction to Enthalpy=              | 0.216094                    |
| Thermal correction to Gibbs Free Energy=     | 0.169295                    |
| Sum of electronic and zero-point Energies=   | -351.101154                 |
| Sum of electronic and thermal Energies=      | -351.090932                 |
| Sum of electronic and thermal Enthalpies=    | -351.089988                 |
| Sum of electronic and thermal Free Energies= | -351.136786                 |

M06-2X/6-31G(d)

## XYZ Coordinates

|   |             |             |             |
|---|-------------|-------------|-------------|
| C | -2.76664400 | -0.55460700 | -0.88981500 |
| H | -2.49422500 | -0.51336600 | -1.94208000 |
| C | -1.97323100 | -0.04493500 | 0.04811100  |
| C | -0.66380800 | 0.64846600  | -0.22098400 |
| H | -0.58671200 | 0.81367200  | -1.30462700 |
| C | 0.56488500  | -0.18824800 | 0.18121200  |
| C | 2.74940800  | 0.20962700  | -0.97856400 |
| C | 1.86917900  | 0.51384600  | -0.02901900 |
| H | 2.08661600  | 1.33632300  | 0.65297700  |
| H | -3.71342800 | -1.02656400 | -0.64593200 |
| H | 2.56674800  | -0.60031900 | -1.68025300 |
| H | 3.68097800  | 0.75621000  | -1.08778600 |
| C | 0.48014900  | -1.10261900 | 1.37645700  |
| H | -0.45648800 | -1.16734000 | 1.92108400  |
| H | 1.36897200  | -1.20066500 | 1.99180700  |
| C | 0.52916200  | -1.67534400 | -0.01557600 |
| H | 1.44365700  | -2.17168800 | -0.32179300 |
| H | -0.38491900 | -2.10611300 | -0.41057600 |
| C | -0.66124300 | 2.01175200  | 0.48422600  |
| H | 0.20881900  | 2.60865300  | 0.19816500  |
| H | -1.56080000 | 2.57860900  | 0.22780700  |
| H | -0.64063100 | 1.87686600  | 1.57223400  |
| H | -2.28572500 | -0.09190600 | 1.09268800  |

|                                              |                             |
|----------------------------------------------|-----------------------------|
| Zero-point correction=                       | 0.206957 (Hartree/Particle) |
| Thermal correction to Energy=                | 0.216985                    |
| Thermal correction to Enthalpy=              | 0.217930                    |
| Thermal correction to Gibbs Free Energy=     | 0.171682                    |
| Sum of electronic and zero-point Energies=   | -350.926605                 |
| Sum of electronic and thermal Energies=      | -350.916577                 |
| Sum of electronic and thermal Enthalpies=    | -350.915632                 |
| Sum of electronic and thermal Free Energies= | -350.961880                 |

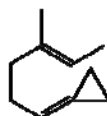

B3LYP/6-31G(d)

MP2/6-31G(d)

## XYZ Coordinates

|   |             |             |             |
|---|-------------|-------------|-------------|
| C | -2.75282600 | -0.54132700 | -0.94492000 |
| H | -2.48285100 | -0.42959400 | -1.99169600 |
| C | -1.95976400 | -0.08320900 | 0.03327700  |
| C | -0.66354300 | 0.64039000  | -0.19602200 |
| H | -0.57450900 | 0.83616900  | -1.27487500 |
| C | 0.57343400  | -0.18229800 | 0.19649600  |
| C | 2.70234600  | 0.23736000  | -1.05379400 |
| C | 1.86561400  | 0.52312300  | -0.04663500 |
| H | 2.12493100  | 1.32729600  | 0.64283700  |
| H | -3.69537100 | -1.03639500 | -0.73268800 |
| H | 2.48487600  | -0.55369900 | -1.76552000 |
| H | 3.62816000  | 0.78596400  | -1.19710700 |
| C | 0.51538600  | -1.08412100 | 1.40568700  |
| H | -0.41033600 | -1.15131900 | 1.96849800  |
| H | 1.41389300  | -1.16442100 | 2.01085200  |
| C | 0.54939500  | -1.67659800 | 0.01934800  |
| H | 1.46448700  | -2.16597200 | -0.29752900 |
| H | -0.36333800 | -2.12532600 | -0.35872500 |
| C | -0.69487800 | 1.98499400  | 0.54217500  |
| H | 0.17624000  | 2.59766500  | 0.29593300  |
| H | -1.59289700 | 2.54813500  | 0.27076800  |
| H | -0.70601300 | 1.82235700  | 1.62538300  |
| H | -2.27825800 | -0.20074900 | 1.07019600  |

|                                              |                             |
|----------------------------------------------|-----------------------------|
| Zero-point correction=                       | 0.208605 (Hartree/Particle) |
| Thermal correction to Energy=                | 0.218623                    |
| Thermal correction to Enthalpy=              | 0.219567                    |
| Thermal correction to Gibbs Free Energy=     | 0.173305                    |
| Sum of electronic and zero-point Energies=   | -349.835989                 |
| Sum of electronic and thermal Energies=      | -349.825972                 |
| Sum of electronic and thermal Enthalpies=    | -349.825027                 |
| Sum of electronic and thermal Free Energies= | -349.871290                 |

## XYZ Coordinates

|   |             |             |             |
|---|-------------|-------------|-------------|
| C | 2.63254200  | 0.92705100  | -0.34173800 |
| H | 2.07317400  | 1.70832600  | -0.85974100 |
| C | 2.02505300  | -0.26113200 | -0.19455500 |
| C | 0.61983100  | -0.46578500 | -0.72799500 |
| H | 0.33548900  | 0.38394400  | -1.35974500 |
| C | -0.45610400 | -0.63682000 | 0.37399500  |
| H | -0.18499300 | -1.49012900 | 1.01248900  |
| H | -0.46197500 | 0.25196400  | 1.01566200  |
| C | -2.86785700 | -0.05711100 | -0.01766800 |
| C | -1.83137900 | -0.86294700 | -0.19696900 |
| H | -1.96130900 | -1.75386000 | -0.81505400 |
| C | -3.40941200 | 1.16441900  | 0.59761200  |
| H | -3.59970900 | 1.17974100  | 1.67035700  |
| H | -3.12934300 | 2.13482000  | 0.18885000  |
| C | -4.28267700 | 0.24257300  | -0.27426100 |
| H | -5.04979900 | -0.35049900 | 0.22287700  |
| H | -4.57879600 | 0.60505200  | -1.25829600 |
| C | 2.64600100  | -1.46116300 | 0.48121800  |
| H | 3.68520600  | -1.29650000 | 0.77481700  |
| H | 2.09071900  | -1.74542900 | 1.38495900  |
| H | 2.62125100  | -2.33421800 | -0.18568000 |
| C | 4.00123300  | 1.34846200  | 0.11494000  |
| H | 4.60940300  | 1.68849500  | -0.73465900 |
| H | 3.93554500  | 2.19817000  | 0.80874900  |
| H | 4.55322100  | 0.55214300  | 0.62126800  |
| H | 0.59852600  | -1.35729700 | -1.37434000 |

|                                              |                             |
|----------------------------------------------|-----------------------------|
| Zero-point correction=                       | 0.232956 (Hartree/Particle) |
| Thermal correction to Energy=                | 0.245117                    |
| Thermal correction to Enthalpy=              | 0.246061                    |
| Thermal correction to Gibbs Free Energy=     | 0.193514                    |
| Sum of electronic and zero-point Energies=   | -390.387980                 |
| Sum of electronic and thermal Energies=      | -390.375819                 |
| Sum of electronic and thermal Enthalpies=    | -390.374875                 |
| Sum of electronic and thermal Free Energies= | -390.427422                 |

## MO6-2X/6-31G(d)

## XYZ Coordinates

|   |             |             |             |
|---|-------------|-------------|-------------|
| C | 2.64869500  | 0.91088700  | -0.37613200 |
| H | 2.13840500  | 1.68599500  | -0.94897900 |
| C | 1.99963400  | -0.24480600 | -0.20015700 |
| C | 0.61361500  | -0.43679100 | -0.76886800 |
| H | 0.32596300  | 0.44072100  | -1.35829900 |
| C | -0.45631300 | -0.68101200 | 0.31117800  |
| H | -0.19238600 | -1.58089500 | 0.88301400  |
| H | -0.46421700 | 0.15991800  | 1.01394900  |
| C | -2.84539700 | -0.05088500 | -0.03668600 |
| C | -1.82414900 | -0.85062800 | -0.28706900 |
| H | -1.95761700 | -1.67652200 | -0.98713600 |
| C | -3.35582600 | 1.11494500  | 0.69285100  |
| H | -3.54544400 | 1.02409800  | 1.75942400  |
| H | -3.04909700 | 2.10822300  | 0.37495500  |
| C | -4.24712400 | 0.31009400  | -0.25761400 |
| H | -5.02392200 | -0.30940500 | 0.18349100  |
| H | -4.52629500 | 0.77518900  | -1.19970000 |
| C | 2.54659600  | -1.42109100 | 0.56885800  |
| H | 3.62782000  | -1.37041600 | 0.70782600  |
| H | 2.08748700  | -1.49345200 | 1.56224600  |
| H | 2.31837700  | -2.35725700 | 0.04558200  |
| C | 4.00977800  | 1.29257000  | 0.12798600  |
| H | 4.66586200  | 1.57874000  | -0.70208200 |
| H | 3.94422000  | 2.16215400  | 0.79229900  |
| H | 4.49880400  | 0.48978200  | 0.68296300  |
| H | 0.61498400  | -1.29657600 | -1.45564200 |

|                                              |                             |
|----------------------------------------------|-----------------------------|
| Zero-point correction=                       | 0.234925 (Hartree/Particle) |
| Thermal correction to Energy=                | 0.247071                    |
| Thermal correction to Enthalpy=              | 0.248016                    |
| Thermal correction to Gibbs Free Energy=     | 0.195288                    |
| Sum of electronic and zero-point Energies=   | -390.185043                 |
| Sum of electronic and thermal Energies=      | -390.172896                 |
| Sum of electronic and thermal Enthalpies=    | -390.171952                 |
| Sum of electronic and thermal Free Energies= | -390.224680                 |

## MP2/6-31G(d)

## XYZ Coordinates

|   |             |             |             |
|---|-------------|-------------|-------------|
| C | 2.58841500  | 0.93496600  | -0.36066900 |
| H | 2.03100100  | 1.70350200  | -0.89833400 |
| C | 1.99178700  | -0.26346300 | -0.21009900 |
| C | 0.59895500  | -0.48336600 | -0.74565200 |
| H | 0.29176700  | 0.37901500  | -1.34901100 |
| C | -0.44648900 | -0.69979500 | 0.36352300  |
| H | -0.16472700 | -1.57098800 | 0.96900000  |
| H | -0.45024600 | 0.17156300  | 1.02875300  |
| C | -2.83045900 | -0.06069000 | -0.01496900 |
| C | -1.82026000 | -0.90409600 | -0.20349300 |
| H | -1.97658500 | -1.78858600 | -0.82399600 |
| C | -3.31312400 | 1.17650200  | 0.60929200  |
| H | -3.50037900 | 1.19025800  | 1.68068500  |
| H | -2.99717700 | 2.13382600  | 0.20082700  |
| C | -4.22918000 | 0.29894700  | -0.26165400 |
| H | -5.01534500 | -0.25995500 | 0.24090400  |
| H | -4.51185900 | 0.68301900  | -1.23922200 |
| C | 2.60687100  | -1.44155900 | 0.50042900  |
| H | 3.68372000  | -1.33256800 | 0.64036400  |
| H | 2.15702200  | -1.59359200 | 1.48799500  |
| H | 2.43566100  | -2.35891100 | -0.07429600 |
| C | 3.94178900  | 1.36327000  | 0.12379700  |
| H | 4.57092100  | 1.68576500  | -0.71352500 |
| H | 3.85346700  | 2.21918300  | 0.80254200  |
| H | 4.47028000  | 0.57178400  | 0.65753100  |
| H | 0.59265200  | -1.35761700 | -1.41324100 |

|                                              |                             |
|----------------------------------------------|-----------------------------|
| Zero-point correction=                       | 0.237291 (Hartree/Particle) |
| Thermal correction to Energy=                | 0.249471                    |
| Thermal correction to Enthalpy=              | 0.250415                    |
| Thermal correction to Gibbs Free Energy=     | 0.197529                    |
| Sum of electronic and zero-point Energies=   | -388.962728                 |
| Sum of electronic and thermal Energies=      | -388.950548                 |
| Sum of electronic and thermal Enthalpies=    | -388.949604                 |
| Sum of electronic and thermal Free Energies= | -389.002490                 |



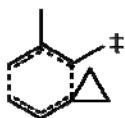

B3LYP/6-31G(d)

## XYZ Coordinates

|   |             |             |             |
|---|-------------|-------------|-------------|
| C | -1.06584400 | -0.52178600 | -0.07521200 |
| C | -0.45394400 | -1.75531100 | -0.36942300 |
| C | 0.81129300  | -2.04263500 | 0.18565400  |
| C | 1.97732000  | -0.72058000 | -0.54027000 |
| C | 1.37973900  | 0.51441000  | -0.19206300 |
| C | 0.15034600  | 0.83884600  | -0.82819100 |
| H | 1.28876200  | -2.97836400 | -0.10741600 |
| H | -0.72131100 | -2.23775500 | -1.31149100 |
| H | 1.94167500  | -1.01871900 | -1.58642000 |
| H | 2.93466400  | -0.96352600 | -0.07768700 |
| H | 0.95578800  | -1.82067800 | 1.24339400  |
| H | 0.07498000  | 0.49152600  | -1.85834700 |
| C | -2.51775800 | -0.18194800 | -0.09383100 |
| H | -2.85191500 | 0.74624300  | -0.55080900 |
| H | -3.23205000 | -0.99679300 | -0.18930100 |
| C | -1.70986100 | -0.06278500 | 1.19661500  |
| H | -1.86892600 | -0.80223600 | 1.97835200  |
| H | -1.53343900 | 0.94236200  | 1.57112200  |
| C | 1.76912000  | 1.18094400  | 1.10507500  |
| H | 1.04029600  | 0.97164200  | 1.90470300  |
| H | 2.74656000  | 0.83161800  | 1.45301600  |
| H | 1.82535300  | 2.27232600  | 1.00804400  |
| C | -0.46483600 | 2.21757600  | -0.65613300 |
| H | -1.45931800 | 2.27563200  | -1.10813100 |
| H | -0.55195000 | 2.51501100  | 0.39355200  |
| H | 0.15738200  | 2.97132900  | -1.15589400 |

Zero-point correction= 0.231954 (Hartree/Particle)  
 Thermal correction to Energy= 0.242775  
 Thermal correction to Enthalpy= 0.243720  
 Thermal correction to Gibbs Free Energy= 0.196536  
 Sum of electronic and zero-point Energies= -390.330414  
 Sum of electronic and thermal Energies= -390.319593  
 Sum of electronic and thermal Enthalpies= -390.318649  
 Sum of electronic and thermal Free Energies= -390.365832

M06-2X/6-31G(d)

## XYZ Coordinates

|   |             |             |             |
|---|-------------|-------------|-------------|
| C | -0.97669400 | -0.62037000 | -0.09329600 |
| C | -0.24590600 | -1.77854800 | -0.38776500 |
| C | 1.03832700  | -1.90190000 | 0.18212500  |
| C | 2.02564300  | -0.50719400 | -0.54198900 |
| C | 1.29368200  | 0.65195000  | -0.19893100 |
| C | 0.05240900  | 0.84039900  | -0.84801800 |
| H | 1.62457200  | -2.78210500 | -0.08036500 |
| H | -0.45828200 | -2.30002300 | -1.32064300 |
| H | 2.03217300  | -0.79730300 | -1.59084100 |
| H | 3.00151300  | -0.63618800 | -0.07351300 |
| H | 1.12909800  | -1.64484900 | 1.23946800  |
| H | 0.02353000  | 0.49174700  | -1.88014200 |
| C | -2.44684600 | -0.41815600 | -0.06986300 |
| H | -2.87327900 | 0.47833600  | -0.50884000 |
| H | -3.07981800 | -1.29680500 | -0.14715600 |
| C | -1.62101200 | -0.22835700 | 1.19277800  |
| H | -1.68488600 | -0.98770600 | 1.96668000  |
| H | -1.53355100 | 0.78684600  | 1.56790600  |
| C | 1.55107100  | 1.30390700  | 1.13134800  |
| H | 0.87130800  | 0.89887200  | 1.89896300  |
| H | 2.57496000  | 1.12423900  | 1.46995100  |
| H | 1.39381500  | 2.38714400  | 1.10118200  |
| C | -0.71879700 | 2.13203100  | -0.66149000 |
| H | -1.68941800 | 2.09655300  | -1.16150000 |
| H | -0.88454800 | 2.37482100  | 0.39198600  |
| H | -0.15845000 | 2.96385100  | -1.10252700 |

Zero-point correction= 0.233902 (Hartree/Particle)  
 Thermal correction to Energy= 0.243742  
 Thermal correction to Enthalpy= 0.244686  
 Thermal correction to Gibbs Free Energy= 0.199881  
 Sum of electronic and zero-point Energies= -390.134704  
 Sum of electronic and thermal Energies= -390.124865  
 Sum of electronic and thermal Enthalpies= -390.123921  
 Sum of electronic and thermal Free Energies= -390.168725

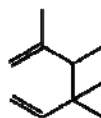

MP2/6-31G(d)

XYZ Coordinates

|   |             |             |             |
|---|-------------|-------------|-------------|
| C | -0.97886500 | -0.62805700 | -0.09423900 |
| C | -0.22999300 | -1.77385900 | -0.39300400 |
| C | 1.10789200  | -1.82998800 | 0.14337700  |
| C | 1.98331800  | -0.54490700 | -0.52874900 |
| C | 1.28985100  | 0.68328100  | -0.20138000 |
| C | 0.04248100  | 0.86159600  | -0.84427700 |
| H | 1.66116300  | -2.74012100 | -0.10494200 |
| H | -0.43574300 | -2.29604100 | -1.33017400 |
| H | 2.01794800  | -0.76620400 | -1.59781600 |
| H | 2.98915000  | -0.62091200 | -0.10518800 |
| H | 1.15908300  | -1.64354600 | 1.22083600  |
| H | 0.02064000  | 0.50559600  | -1.87592500 |
| C | -2.45672200 | -0.46806200 | -0.04581000 |
| H | -2.91685700 | 0.41428900  | -0.48087000 |
| H | -3.06842900 | -1.36390200 | -0.11216400 |
| C | -1.61159200 | -0.24941400 | 1.20449300  |
| H | -1.64278200 | -1.00529600 | 1.98534600  |
| H | -1.54543200 | 0.76958800  | 1.57443700  |
| C | 1.55719500  | 1.29843600  | 1.14169700  |
| H | 1.01552600  | 0.75976100  | 1.93726400  |
| H | 2.62325800  | 1.25530800  | 1.38473000  |
| H | 1.24833000  | 2.34662500  | 1.18899400  |
| C | -0.75018200 | 2.14110200  | -0.67437700 |
| H | -1.73313700 | 2.06479100  | -1.14501600 |
| H | -0.89210100 | 2.41101700  | 0.37422400  |
| H | -0.22091500 | 2.96826900  | -1.16012500 |

B3LYP/6-31G(d) XYZ Coordinates

|   |             |             |             |
|---|-------------|-------------|-------------|
| C | -2.23147900 | -0.83394600 | -1.28441600 |
| H | -1.68494300 | -1.03183400 | -2.20357700 |
| C | -1.73044700 | -0.04962400 | -0.32227800 |
| C | -0.35421000 | 0.59291400  | -0.48131800 |
| H | -0.13330000 | 0.60525100  | -1.55735700 |
| C | 0.81459900  | -0.21907300 | 0.15624900  |
| C | 3.17979500  | 0.30314900  | -0.55775600 |
| C | 2.11251500  | 0.53328600  | 0.20925700  |
| H | 2.16255200  | 1.33888100  | 0.94296900  |
| H | -3.21060500 | -1.29885200 | -1.19427500 |
| H | 3.18889400  | -0.48245100 | -1.30961100 |
| H | 4.08771000  | 0.89264900  | -0.45935400 |
| C | 0.57841000  | -1.19761600 | 1.29499400  |
| H | -0.42936300 | -1.34638100 | 1.66778200  |
| H | 1.35174000  | -1.27622900 | 2.05511800  |
| C | 0.89124300  | -1.70749900 | -0.09055200 |
| H | 1.86682400  | -2.15033800 | -0.26643100 |
| H | 0.07825900  | -2.17179000 | -0.64040900 |
| C | -2.54155500 | 0.26725200  | 0.91567300  |
| H | -2.88932200 | 1.30834400  | 0.90122000  |
| H | -3.42470600 | -0.37579200 | 0.98193900  |
| H | -1.96159000 | 0.14932800  | 1.83788700  |
| C | -0.36691300 | 2.06352000  | -0.01464800 |
| H | 0.55514300  | 2.57339200  | -0.30821600 |
| H | -1.20353200 | 2.60276100  | -0.47264900 |
| H | -0.46550700 | 2.14888500  | 1.07373800  |

Zero-point correction= 0.208175 (Hartree/Particle)  
 Thermal correction to Energy= 0.216889  
 Thermal correction to Enthalpy= 0.217833  
 Thermal correction to Gibbs Free Energy= 0.175402  
 Sum of electronic and zero-point Energies= -349.789615  
 Sum of electronic and thermal Energies= -349.780901  
 Sum of electronic and thermal Enthalpies= -349.779957  
 Sum of electronic and thermal Free Energies= -349.822388

Zero-point correction= 0.233813 (Hartree/Particle)  
 Thermal correction to Energy= 0.245141  
 Thermal correction to Enthalpy= 0.246085  
 Thermal correction to Gibbs Free Energy= 0.197128  
 Sum of electronic and zero-point Energies= -390.386308  
 Sum of electronic and thermal Energies= -390.374980  
 Sum of electronic and thermal Enthalpies= -390.374036  
 Sum of electronic and thermal Free Energies= -390.422992



MP2/6-31G(d)

XYZ Coordinates

|   |             |             |             |
|---|-------------|-------------|-------------|
| C | -0.97886500 | -0.62805700 | -0.09423900 |
| C | -0.22999300 | -1.77385900 | -0.39300400 |
| C | 1.10789200  | -1.82998800 | 0.14337700  |
| C | 1.98331800  | -0.54490700 | -0.52874900 |
| C | 1.28985100  | 0.68328100  | -0.20138000 |
| C | 0.04248100  | 0.86159600  | -0.84427700 |
| H | 1.66116300  | -2.74012100 | -0.10494200 |
| H | -0.43574300 | -2.29604100 | -1.33017400 |
| H | 2.01794800  | -0.76620400 | -1.59781600 |
| H | 2.98915000  | -0.62091200 | -0.10518800 |
| H | 1.15908300  | -1.64354600 | 1.22083600  |
| H | 0.02064000  | 0.50559600  | -1.87592500 |
| C | -2.45672200 | -0.46806200 | -0.04581000 |
| H | -2.91685700 | 0.41428900  | -0.48087000 |
| H | -3.06842900 | -1.36390200 | -0.11216400 |
| C | -1.61159200 | -0.24941400 | 1.20449300  |
| H | -1.64278200 | -1.00529600 | 1.98534600  |
| H | -1.54543200 | 0.76958800  | 1.57443700  |
| C | 1.55719500  | 1.29843600  | 1.14169700  |
| H | 1.01552600  | 0.75976100  | 1.93726400  |
| H | 2.62325800  | 1.25530800  | 1.38473000  |
| H | 1.24833000  | 2.34662500  | 1.18899400  |
| C | -0.75018200 | 2.14110200  | -0.67437700 |
| H | -1.73313700 | 2.06479100  | -1.14501600 |
| H | -0.89210100 | 2.41101700  | 0.37422400  |
| H | -0.22091500 | 2.96826900  | -1.16012500 |

B3LYP/6-31G(d) XYZ Coordinates

|   |             |             |             |
|---|-------------|-------------|-------------|
| C | -2.23147900 | -0.83394600 | -1.28441600 |
| H | -1.68494300 | -1.03183400 | -2.20357700 |
| C | -1.73044700 | -0.04962400 | -0.32227800 |
| C | -0.35421000 | 0.59291400  | -0.48131800 |
| H | -0.13330000 | 0.60525100  | -1.55735700 |
| C | 0.81459900  | -0.21907300 | 0.15624900  |
| C | 3.17979500  | 0.30314900  | -0.55775600 |
| C | 2.11251500  | 0.53328600  | 0.20925700  |
| H | 2.16255200  | 1.33888100  | 0.94296900  |
| H | -3.21060500 | -1.29885200 | -1.19427500 |
| H | 3.18889400  | -0.48245100 | -1.30961100 |
| H | 4.08771000  | 0.89264900  | -0.45935400 |
| C | 0.57841000  | -1.19761600 | 1.29499400  |
| H | -0.42936300 | -1.34638100 | 1.66778200  |
| H | 1.35174000  | -1.27622900 | 2.05511800  |
| C | 0.89124300  | -1.70749900 | -0.09055200 |
| H | 1.86682400  | -2.15033800 | -0.26643100 |
| H | 0.07825900  | -2.17179000 | -0.64040900 |
| C | -2.54155500 | 0.26725200  | 0.91567300  |
| H | -2.88932200 | 1.30834400  | 0.90122000  |
| H | -3.42470600 | -0.37579200 | 0.98193900  |
| H | -1.96159000 | 0.14932800  | 1.83788700  |
| C | -0.36691300 | 2.06352000  | -0.01464800 |
| H | 0.55514300  | 2.57339200  | -0.30821600 |
| H | -1.20353200 | 2.60276100  | -0.47264900 |
| H | -0.46550700 | 2.14888500  | 1.07373800  |

Zero-point correction= 0.208175 (Hartree/Particle)  
 Thermal correction to Energy= 0.216889  
 Thermal correction to Enthalpy= 0.217833  
 Thermal correction to Gibbs Free Energy= 0.175402  
 Sum of electronic and zero-point Energies= -349.789615  
 Sum of electronic and thermal Energies= -349.780901  
 Sum of electronic and thermal Enthalpies= -349.779957  
 Sum of electronic and thermal Free Energies= -349.822388

Zero-point correction= 0.233813 (Hartree/Particle)  
 Thermal correction to Energy= 0.245141  
 Thermal correction to Enthalpy= 0.246085  
 Thermal correction to Gibbs Free Energy= 0.197128  
 Sum of electronic and zero-point Energies= -390.386308  
 Sum of electronic and thermal Energies= -390.374980  
 Sum of electronic and thermal Enthalpies= -390.374036  
 Sum of electronic and thermal Free Energies= -390.422992

## M06-2X/6-31G(d)

## XYZ Coordinates

|   |             |             |             |
|---|-------------|-------------|-------------|
| C | -2.24407800 | -0.88541500 | -1.19377300 |
| H | -1.72280900 | -1.13536800 | -2.11433400 |
| C | -1.71677300 | -0.04335900 | -0.30385100 |
| C | -0.34891300 | 0.57708500  | -0.52841300 |
| H | -0.14326300 | 0.53921000  | -1.60656800 |
| C | 0.79524800  | -0.22189700 | 0.13952700  |
| C | 3.17149000  | 0.28954600  | -0.48053200 |
| C | 2.08413200  | 0.53213200  | 0.24607300  |
| H | 2.10404300  | 1.34341100  | 0.97449200  |
| H | -3.21728600 | -1.34393300 | -1.04005400 |
| H | 3.19107400  | -0.50403300 | -1.22318300 |
| H | 4.07896000  | 0.87292500  | -0.35909800 |
| C | 0.51620100  | -1.20970700 | 1.24727800  |
| H | -0.50820900 | -1.36967200 | 1.56486000  |
| H | 1.25899200  | -1.29766000 | 2.03410500  |
| C | 0.88753200  | -1.69663300 | -0.12519500 |
| H | 1.87120000  | -2.13172800 | -0.26333900 |
| H | 0.09569000  | -2.15082500 | -0.71221200 |
| C | -2.47229300 | 0.35178400  | 0.94154200  |
| H | -2.84453600 | 1.37952100  | 0.85795100  |
| H | -3.33103800 | -0.30466400 | 1.10387700  |
| H | -1.83630900 | 0.32065100  | 1.83233200  |
| C | -0.33753300 | 2.05449700  | -0.11218000 |
| H | 0.58490300  | 2.54154100  | -0.43821700 |
| H | -1.17832900 | 2.58597900  | -0.56865600 |
| H | -0.41315600 | 2.16644300  | 0.97517900  |

|                                              |                             |
|----------------------------------------------|-----------------------------|
| Zero-point correction=                       | 0.235830 (Hartree/Particle) |
| Thermal correction to Energy=                | 0.247017                    |
| Thermal correction to Enthalpy=              | 0.247961                    |
| Thermal correction to Gibbs Free Energy=     | 0.199298                    |
| Sum of electronic and zero-point Energies=   | -390.193908                 |
| Sum of electronic and thermal Energies=      | -390.182722                 |
| Sum of electronic and thermal Enthalpies=    | -390.181777                 |
| Sum of electronic and thermal Free Energies= | -390.230441                 |

## MP2/6-31G(d)

## XYZ Coordinates

|   |             |             |             |
|---|-------------|-------------|-------------|
| C | -2.20357000 | -0.86245600 | -1.25977000 |
| H | -1.65473500 | -1.08638600 | -2.17028500 |
| C | -1.70263500 | -0.04071800 | -0.32136100 |
| C | -0.33444600 | 0.58694100  | -0.49691100 |
| H | -0.10540600 | 0.57892800  | -1.57274900 |
| C | 0.79988400  | -0.22076500 | 0.16823400  |
| C | 3.14184800  | 0.29588800  | -0.56344300 |
| C | 2.09771200  | 0.51361900  | 0.24815300  |
| H | 2.17846400  | 1.28370400  | 1.01630200  |
| H | -3.18122200 | -1.32505300 | -1.15287400 |
| H | 3.10645300  | -0.45672000 | -1.34563500 |
| H | 4.06228700  | 0.86408900  | -0.47031900 |
| C | 0.52177200  | -1.19370100 | 1.29159500  |
| H | -0.49851400 | -1.33755400 | 1.62735400  |
| H | 1.27194200  | -1.27693100 | 2.07328300  |
| C | 0.87361000  | -1.70386800 | -0.08033100 |
| H | 1.85244300  | -2.14819300 | -0.22648200 |
| H | 0.07274400  | -2.15842300 | -0.65439200 |
| C | -2.51148500 | 0.32335800  | 0.89922300  |
| H | -2.88626500 | 1.34984100  | 0.82515500  |
| H | -3.37429200 | -0.34097600 | 1.00191700  |
| H | -1.92103900 | 0.26643600  | 1.81771300  |
| C | -0.33520200 | 2.05301700  | -0.04530000 |
| H | 0.59322300  | 2.54774700  | -0.34025000 |
| H | -1.16530400 | 2.59404500  | -0.51033000 |
| H | -0.43571200 | 2.13754900  | 1.04105300  |

|                                              |                             |
|----------------------------------------------|-----------------------------|
| Zero-point correction=                       | 0.237990 (Hartree/Particle) |
| Thermal correction to Energy=                | 0.249098                    |
| Thermal correction to Enthalpy=              | 0.250042                    |
| Thermal correction to Gibbs Free Energy=     | 0.201689                    |
| Sum of electronic and zero-point Energies=   | -388.974827                 |
| Sum of electronic and thermal Energies=      | -388.963719                 |
| Sum of electronic and thermal Enthalpies=    | -388.962775                 |
| Sum of electronic and thermal Free Energies= | -389.011129                 |

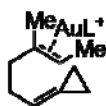

Grot(B3LYP)=-986.796812  
 Grot(M06-2X)=-986.341187  
 Grot(M06)=-986.312685

## XYZ Coordinates

|    |             |             |             |
|----|-------------|-------------|-------------|
| C  | 1.45618500  | 0.24980300  | 0.35363200  |
| C  | 1.71452000  | 1.61680500  | -0.22303000 |
| C  | 3.21091800  | 1.97439200  | -0.13247300 |
| C  | 4.06330700  | 1.03684900  | -0.92887700 |
| C  | 4.90309800  | 0.16433200  | -0.39419800 |
| H  | 1.12981200  | 2.37326000  | 0.32110900  |
| H  | 3.53616600  | 1.97713900  | 0.91804400  |
| H  | 3.32694200  | 3.00370200  | -0.50224200 |
| H  | 1.39705700  | 1.65002400  | -1.27611900 |
| Au | -0.88371900 | -0.11365700 | -0.87725700 |
| P  | -3.21451900 | 0.15260900  | 0.00833900  |
| H  | 3.94514700  | 1.06986900  | -2.01649500 |
| C  | 1.29800200  | -0.83649300 | -0.48125800 |
| H  | 1.35313000  | -0.63461000 | -1.55628500 |
| C  | 5.89891800  | -0.88748100 | -0.56583000 |
| H  | 6.88669500  | -0.61907000 | -0.94292300 |
| H  | 5.57166600  | -1.88746400 | -0.85399400 |
| C  | 5.50838200  | -0.38196600 | 0.82125700  |
| H  | 6.23510500  | 0.21953300  | 1.36896200  |
| H  | 4.92074600  | -1.05083600 | 1.45314000  |
| C  | 1.39473700  | -2.27650000 | -0.08212400 |
| H  | 0.77882000  | -2.91041800 | -0.72962200 |
| H  | 2.43678600  | -2.61396500 | -0.19119100 |
| H  | 1.09669900  | -2.45542200 | 0.95681800  |
| C  | 1.66624900  | 0.11008500  | 1.83150900  |
| H  | 1.17110000  | -0.76988300 | 2.25529500  |
| H  | 2.74333700  | 0.00921000  | 2.03528200  |
| H  | 1.31369500  | 1.00161600  | 2.36483600  |
| C  | -4.05693900 | -1.12210100 | 0.99725900  |
| H  | -3.67403100 | -1.10767300 | 2.02339800  |
| H  | -5.13731800 | -0.92952600 | 1.00974200  |
| H  | -3.86988200 | -2.11086800 | 0.56450200  |
| C  | -4.01318200 | 0.09742100  | -1.62577300 |
| H  | -3.82210700 | -0.87252300 | -2.09766900 |
| H  | -5.09581700 | 0.24066800  | -1.51634500 |
| H  | -3.60536000 | 0.88745100  | -2.26549500 |
| C  | -3.72341000 | 1.73917900  | 0.74093000  |
| H  | -4.81876000 | 1.88282300  | 0.77041600  |
| H  | -3.32744100 | 1.81894400  | 1.75909600  |
| H  | -3.32753200 | 2.56707500  | 0.14291200  |

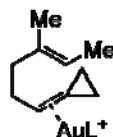

Grot(B3LYP)=-986.797451  
 Grot(M06-2X)=-986.339889  
 Grot(M06)=-986.311227

## XYZ Coordinates

|    |             |             |             |
|----|-------------|-------------|-------------|
| C  | 1.32515200  | 0.82607000  | -0.17057000 |
| C  | 1.34501300  | -0.35821500 | -0.84056300 |
| C  | 1.78829200  | -1.65075400 | -0.22302500 |
| C  | 3.26994100  | -1.90548200 | -0.56847500 |
| C  | 4.19828000  | -0.91546400 | 0.08553300  |
| C  | 4.68661300  | 0.11802600  | -0.61573100 |
| H  | 1.17873200  | -2.48275500 | -0.60070100 |
| H  | 1.24708400  | -0.33338900 | -1.93131100 |
| H  | 3.38602600  | -1.87556700 | -1.66233200 |
| H  | 3.51999600  | -2.92929100 | -0.25038600 |
| H  | 1.64959700  | -1.61198000 | 0.86743400  |
| H  | 4.40426900  | 0.17661700  | -1.67262300 |
| C  | 1.47801000  | 2.27878800  | -0.25549200 |
| H  | 2.31708100  | 2.65369500  | -0.84252900 |
| H  | 0.59206700  | 2.91274900  | -0.27151200 |
| C  | 1.76154100  | 1.52387900  | 1.04069300  |
| H  | 1.05453300  | 1.67054000  | 1.85693100  |
| H  | 2.79885300  | 1.37724200  | 1.34649700  |
| Au | -0.87888400 | 0.03601600  | -0.20226200 |
| P  | -3.19520800 | -0.16577500 | 0.13053300  |
| C  | 4.47617200  | -1.18014600 | 1.53481100  |
| H  | 4.96708600  | -2.15663900 | 1.66091300  |
| H  | 5.11388900  | -0.42312300 | 2.00278300  |
| H  | 3.54351000  | -1.22905400 | 2.11748500  |
| C  | 5.57951700  | 1.21714300  | -0.14352300 |
| H  | 6.51957700  | 1.23556200  | -0.71329000 |
| H  | 5.10938300  | 2.20000700  | -0.29748200 |
| H  | 5.83717200  | 1.13761200  | 0.91864900  |
| C  | -4.06905800 | -0.77702400 | -1.34375800 |
| H  | -5.14362400 | -0.85534200 | -1.13525700 |
| H  | -3.91006500 | -0.08580100 | -2.17841200 |
| H  | -3.67973500 | -1.76222900 | -1.62262300 |
| C  | -4.00404700 | 1.40863700  | 0.55444000  |
| H  | -3.83698300 | 2.14030600  | -0.24337200 |
| H  | -5.08234100 | 1.24867500  | 0.68232700  |
| H  | -3.58221900 | 1.80014100  | 1.48643100  |
| C  | -3.64543000 | -1.31000400 | 1.47168000  |
| H  | -4.73760500 | -1.36124200 | 1.56599900  |
| H  | -3.25165000 | -2.30880700 | 1.25512300  |
| H  | -3.21566700 | -0.96858800 | 2.41593700  |



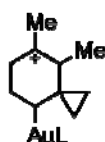

Gtot(B3LYP)=-986.773535  
 Gtot(M06-2X)=-986.321557  
 Gtot(M06)=-986.298606

## XYZ Coordinates

|    |             |             |             |
|----|-------------|-------------|-------------|
| C  | 2.12112800  | 0.66334000  | -0.26899700 |
| C  | 1.23235900  | -0.50309700 | -0.57378800 |
| C  | 1.69745600  | -1.69517000 | 0.21182600  |
| C  | 3.25301200  | -1.99919000 | -0.10527400 |
| C  | 3.90845500  | -0.74573100 | 0.18002300  |
| C  | 3.65140300  | 0.36026300  | -0.72472500 |
| H  | 1.17098400  | -2.62463500 | -0.03796200 |
| H  | 1.29647600  | -0.73098400 | -1.65164300 |
| H  | 3.29517100  | -2.27276100 | -1.16505600 |
| H  | 3.58955000  | -2.82318400 | 0.53230000  |
| H  | 1.61063900  | -1.53686000 | 1.29674400  |
| H  | 3.55502800  | 0.00307000  | -1.75674400 |
| C  | 1.67828400  | 2.09633400  | -0.37994100 |
| C  | 2.38910400  | 2.84597000  | -0.71910700 |
| H  | 0.65855500  | 2.25706200  | -0.72602000 |
| C  | 1.90394400  | 1.48889800  | 0.96900800  |
| H  | 1.04284700  | 1.22699500  | 1.58388000  |
| H  | 2.76273200  | 1.85057400  | 1.53374300  |
| Au | -0.85320400 | -0.21461300 | -0.19786300 |
| P  | -3.18637600 | 0.06905800  | 0.18589500  |
| C  | 4.60324900  | -0.56529500 | 1.46076100  |
| H  | 4.55080100  | 0.45585400  | 1.85152500  |
| H  | 4.27062100  | -1.28914300 | 2.21365100  |
| H  | 5.67275100  | -0.76975300 | 1.27338100  |
| C  | 4.59868200  | 1.54498000  | -0.66580200 |
| H  | 4.37368600  | 2.24495500  | -1.47631100 |
| H  | 4.55184700  | 2.09652200  | 0.28105200  |
| H  | 5.63344600  | 1.20834500  | -0.80258000 |
| C  | -3.60013400 | 1.26795900  | 1.49870100  |
| H  | -4.68883800 | 1.34723000  | 1.61394400  |
| H  | -3.15906400 | 0.94146200  | 2.44721100  |
| H  | -3.19095800 | 2.25193800  | 1.24383700  |
| C  | -4.12409200 | 0.65817700  | -1.26498500 |
| H  | -5.18672500 | 0.77101900  | -1.01380500 |
| H  | -3.72537700 | 1.62392100  | -1.59555000 |
| H  | -4.02066700 | -0.06093800 | -2.08527700 |
| C  | -4.06169300 | -1.45165400 | 0.69079500  |
| H  | -5.12958400 | -1.24531600 | 0.84005700  |
| H  | -3.94616400 | -2.21992500 | -0.08196400 |
| H  | -3.63261500 | -1.82955000 | 1.62564400  |

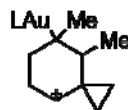

Gtot(B3LYP)=-986.76329  
 Gtot(M06-2X)=-986.310046  
 Gtot(M06)=-986.288615

## XYZ Coordinates

|    |             |             |             |
|----|-------------|-------------|-------------|
| C  | -2.09239500 | 0.68958500  | -0.26256700 |
| C  | -1.29679400 | -0.49939500 | 0.31905300  |
| C  | -1.66004600 | -1.75757800 | -0.47838200 |
| C  | -3.14670200 | -2.10916300 | -0.39261200 |
| C  | -4.02732100 | -0.94843100 | -0.46067900 |
| C  | -3.59078200 | 0.36139700  | -0.35028800 |
| H  | -1.07468800 | -2.62007900 | -0.13148600 |
| H  | -3.39026300 | -2.58960800 | 0.57556800  |
| H  | -3.47672100 | -2.85511100 | -1.13263600 |
| H  | -5.10085900 | -1.12800700 | -0.56981200 |
| H  | -1.40207800 | -1.61507600 | -1.53941100 |
| Au | 0.80235400  | -0.16335300 | 0.08626200  |
| P  | 3.16419900  | 0.20423800  | -0.16215400 |
| C  | -4.58164600 | 1.40455200  | -1.02013400 |
| H  | -4.00962800 | 2.24177000  | -1.41719200 |
| H  | -5.32937300 | 0.98961900  | -1.69125400 |
| C  | -4.71446700 | 1.24374500  | 0.39498000  |
| H  | -5.55381000 | 0.69194100  | 0.80944000  |
| H  | -4.23739400 | 1.94337000  | 1.07614300  |
| H  | -1.77311300 | 0.81330000  | -1.31317300 |
| C  | -1.60650900 | -0.70523700 | 1.80445500  |
| H  | -1.19389300 | 0.09601900  | 2.43131500  |
| H  | -2.68940900 | -0.75092500 | 2.02894400  |
| H  | -1.16461000 | -1.64760000 | 2.16009300  |
| C  | -1.81229200 | 2.00814700  | 0.44626100  |
| H  | -0.73494600 | 2.21492000  | 0.39901600  |
| H  | -2.32589800 | 2.86204100  | -0.81610700 |
| H  | -2.08891200 | 1.97700200  | 1.50829400  |
| C  | 3.94460300  | -0.65828500 | -1.57232600 |
| H  | 5.01865700  | -0.43400100 | -1.61185600 |
| H  | 3.80555200  | -1.74017500 | -1.46699300 |
| H  | 3.47430200  | -0.33596200 | -2.50828600 |
| C  | 4.18667800  | -0.30240000 | 1.26595100  |
| H  | 4.05543400  | -1.37394400 | 1.45434900  |
| H  | 5.24712400  | -0.09705500 | 1.06904900  |
| H  | 3.87309000  | 0.24941900  | 2.15945300  |
| C  | 3.63324600  | 1.95175500  | -0.42129000 |
| H  | 4.72191400  | 2.04619200  | -0.52640600 |
| H  | 3.14942000  | 2.33344200  | -1.32761100 |
| H  | 3.29987200  | 2.55418600  | 0.43140300  |

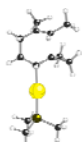

Gtot(B3LYP)=-986.767852  
 Gtot(M06-2X)=-986.311297  
 Gtot(M06)=-986.287934

## XYZ Coordinates

|    |             |             |             |
|----|-------------|-------------|-------------|
| C  | 1.93100700  | 0.68590200  | -0.14298100 |
| C  | 1.22971600  | -0.42800000 | -0.68602500 |
| C  | 1.66149600  | -1.73466400 | -0.07754300 |
| C  | 3.18002300  | -1.96236300 | -0.38893800 |
| C  | 3.95250700  | -0.78394400 | 0.06632800  |
| C  | 4.01194200  | 0.33117700  | -0.73655100 |
| H  | 1.09403900  | -2.58646200 | -0.47184800 |
| H  | 1.25122000  | -0.44176500 | -1.78604200 |
| H  | 3.28495600  | -2.11219000 | -1.47088200 |
| H  | 3.51273100  | -2.87420800 | 0.12331700  |
| H  | 1.52107000  | -1.72220600 | 1.01414500  |
| H  | 3.70739400  | 0.19677600  | -1.77645500 |
| C  | 1.79023900  | 2.15135200  | -0.13553900 |
| H  | 2.63585600  | 2.77848200  | -0.41169800 |
| H  | 0.82359900  | 2.55467200  | -0.43593200 |
| C  | 1.92278900  | 1.37356000  | 1.16149100  |
| H  | 1.05023100  | 1.21992300  | 1.79695600  |
| H  | 2.85399600  | 1.50901100  | 1.71119100  |
| Au | -0.87840900 | -0.10763500 | -0.25003300 |
| P  | -3.19266300 | 0.09529100  | 0.16143500  |
| C  | 4.49776800  | -0.82767600 | 1.44866000  |
| H  | 4.90411600  | 0.12691200  | 1.79567600  |
| H  | 3.72839800  | -1.16748700 | 2.15903100  |
| H  | 5.30587400  | -1.57193500 | 1.49701500  |
| C  | 4.86044400  | 1.53568100  | -0.46889100 |
| H  | 4.64834800  | 2.33460800  | -1.18726200 |
| H  | 4.73908700  | 1.94449100  | 0.54261300  |
| H  | 5.92349900  | 1.28097500  | -0.58083700 |
| C  | -3.82755600 | 1.80411100  | 0.15790400  |
| H  | -4.90668000 | 1.80234700  | 0.35858800  |
| H  | -3.31601400 | 2.38945200  | 0.92981600  |
| H  | -3.64047100 | 2.26748500  | -0.81702200 |
| C  | -3.71525000 | -0.58060000 | 1.77214900  |
| H  | -4.79925400 | -0.46112100 | 1.89730200  |
| H  | -3.45872200 | -1.64436900 | 1.82577900  |
| H  | -3.19664100 | -0.05343600 | 2.58049000  |
| C  | -4.22820600 | -0.77927200 | -1.05780200 |
| H  | -3.96731100 | -1.84334500 | -1.06881900 |
| H  | -5.28953600 | -0.66808600 | -0.80079700 |
| H  | -4.05240100 | -0.36453900 | -2.05659900 |

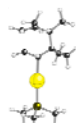

Gtot(B3LYP)=-986.769742  
 Gtot(M06-2X)=-986.315581  
 Gtot(M06)=-986.293575

## XYZ Coordinates

|    |             |             |             |
|----|-------------|-------------|-------------|
| C  | 2.15707100  | 0.79863100  | -0.25856100 |
| C  | 1.27194200  | -0.32236500 | -0.70026300 |
| C  | 1.52772200  | -1.54968900 | -0.02433600 |
| C  | 3.51285400  | -2.03129600 | -0.46619000 |
| C  | 3.92391300  | -0.85507900 | 0.10367100  |
| C  | 3.64868900  | 0.42823700  | -0.60738900 |
| H  | 1.15568300  | -2.48994100 | -0.43573800 |
| H  | 1.24549200  | -0.43057300 | -1.79477100 |
| H  | 3.33931800  | -2.09366000 | -1.54016200 |
| H  | 3.67186400  | -2.97849100 | 0.04993700  |
| H  | 1.61437200  | -1.54071700 | 1.06433800  |
| H  | 3.65503800  | 0.23336500  | -1.69077400 |
| C  | 1.69653400  | 2.22068200  | -0.33952800 |
| H  | 2.41328200  | 2.99512800  | -0.60532300 |
| H  | 0.68944600  | 2.39308800  | -0.71805100 |
| C  | 1.85566400  | 1.56216900  | 1.00095700  |
| H  | 0.96283500  | 1.28329300  | 1.56173900  |
| H  | 2.67971700  | 1.90644400  | 1.62456600  |
| Au | -0.85173500 | -0.17915100 | -0.20982000 |
| P  | -3.16649000 | 0.07554500  | 0.20011000  |
| C  | 4.40135900  | -0.81690700 | 1.51071800  |
| H  | 3.78092100  | -0.14430300 | 2.12120800  |
| H  | 4.40234600  | -1.81230100 | 1.96742200  |
| H  | 5.42460400  | -0.41748800 | 1.55585800  |
| C  | 4.66426200  | 1.52551700  | -0.31578300 |
| H  | 4.47948300  | 2.40275600  | -0.94456700 |
| H  | 4.65553400  | 1.84859000  | 0.73241700  |
| H  | 5.67745400  | 1.17206400  | -0.54245400 |
| C  | -3.88156200 | -1.18220500 | 1.30937300  |
| H  | -4.95542200 | -0.99859200 | 1.44331600  |
| H  | -3.73540100 | -2.17978300 | 0.88080700  |
| H  | -3.38270800 | -1.14140400 | 2.28383500  |
| C  | -3.61681200 | 1.66740700  | 0.96487700  |
| H  | -3.30334400 | 2.49258100  | 0.31598900  |
| H  | -4.70268200 | 1.71793800  | 1.11686500  |
| H  | -3.11072300 | 1.76901400  | 1.93125800  |
| C  | -4.18468500 | -0.01368100 | -1.30958000 |
| H  | -5.24442400 | 0.12847500  | -1.06157200 |
| H  | -3.86977500 | 0.76461100  | -2.01343300 |
| H  | -4.05179600 | -0.99156200 | -1.78574500 |

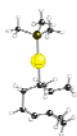

Gtot(B3LYP)=-986.750043  
 Gtot(M06-2X)=-986.296636  
 Gtot(M06)=-986.27279

## XYZ Coordinates

|    |             |             |             |
|----|-------------|-------------|-------------|
| C  | 1.90003600  | -0.65300700 | -0.40941900 |
| C  | 1.36695300  | 0.42428800  | 0.39968500  |
| C  | 1.59626400  | 1.76593100  | -0.21556100 |
| C  | 3.18280700  | 2.08058900  | -0.25380100 |
| C  | 3.78323000  | 0.99950300  | -1.00337700 |
| C  | 3.85730400  | -0.27186200 | -0.46918100 |
| H  | 1.13613200  | 2.58265800  | 0.35382100  |
| H  | 3.52179500  | 2.11296900  | 0.78957000  |
| H  | 3.31130500  | 3.06028900  | -0.72369700 |
| H  | 3.90761300  | 1.11993800  | -2.08326300 |
| H  | 1.23632900  | 1.82418200  | -1.24991700 |
| Au | -0.80048400 | 0.10449700  | 0.09489500  |
| P  | -3.13120600 | -0.17251400 | -0.14737300 |
| C  | 4.81054600  | -1.36945200 | -0.71290700 |
| H  | 4.45002600  | -2.37678500 | -0.91383700 |
| H  | 5.73948900  | -1.12229500 | -1.22548900 |
| C  | 4.58614200  | -0.83282200 | 0.69228000  |
| H  | 5.35455800  | -0.21066600 | 1.15087000  |
| H  | 4.07310700  | -1.49476900 | 1.38827700  |
| H  | 1.70615200  | -0.53343900 | -1.48021000 |
| C  | 1.61281900  | 0.38125900  | 1.89606800  |
| H  | 1.28072900  | -0.55921300 | 2.35321300  |
| H  | 2.68342200  | 0.50274800  | 2.13714700  |
| H  | 1.07164700  | 1.19428100  | 2.39701700  |
| C  | 1.82568500  | -2.09605400 | 0.01696500  |
| H  | 2.48679600  | -2.73026600 | -0.58155300 |
| H  | 2.05624400  | -2.24427200 | 1.07724100  |
| H  | 0.80743200  | -2.46742800 | -0.15533100 |
| C  | -4.07343100 | 1.38334100  | -0.02879000 |
| H  | -3.73187200 | 2.08217300  | -0.80027000 |
| H  | -5.14492400 | 1.18797800  | -0.16454600 |
| H  | -3.91021400 | 1.83879800  | 0.95429000  |
| C  | -3.88551600 | -1.26497200 | 1.10127000  |
| H  | -3.71075100 | -0.65898200 | 2.10362700  |
| H  | -4.96591500 | -1.34680100 | 0.92605500  |
| H  | -3.43287800 | -2.26086600 | 1.04117900  |
| C  | -3.62789300 | -0.89417500 | -1.74580600 |
| H  | -4.71967400 | -0.99964100 | -1.78852000 |
| H  | -3.29403000 | -0.24754700 | -2.56473100 |
| H  | -3.16408600 | -1.87958900 | -1.86503900 |

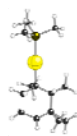

Gtot(B3LYP)=-986.75146  
 Gtot(M06-2X)=-986.296438  
 Gtot(M06)=-986.28187

## XYZ Coordinates

|    |             |             |             |
|----|-------------|-------------|-------------|
| C  | 1.96094200  | -0.95422000 | 0.48065200  |
| C  | 1.39212800  | 0.39637100  | 0.15531800  |
| C  | 1.83947600  | 0.82887200  | -1.20862300 |
| C  | 3.50022200  | 0.89079300  | -1.19578200 |
| C  | 4.02259900  | -0.37154300 | -0.79161500 |
| C  | 3.53917700  | -0.99661700 | 0.39539600  |
| H  | 3.66031600  | 1.66064500  | -0.42241300 |
| H  | 3.87635800  | 1.24143800  | -2.16069100 |
| H  | 4.69610600  | -0.92178800 | -1.45495800 |
| H  | 1.59187000  | 0.05846900  | -1.95263300 |
| Au | -0.75985100 | 0.09153700  | 0.04024200  |
| P  | -3.11351700 | -0.24643800 | -0.03729200 |
| C  | 4.26678000  | -2.12576200 | 1.04405500  |
| H  | 3.65411300  | -2.90580900 | 1.49449400  |
| H  | 5.18710600  | -2.47554800 | 0.57755300  |
| C  | 4.29045300  | -0.79288900 | 1.71705800  |
| H  | 5.20958200  | -0.21131500 | 1.68962200  |
| H  | 3.66659100  | -0.62741600 | 2.59449300  |
| H  | 1.69450400  | -1.28831400 | 1.49440700  |
| H  | 1.60641100  | -1.72399600 | -0.22038200 |
| C  | -3.62761500 | -1.97680800 | 0.22686700  |
| H  | -3.27819800 | -2.32154000 | 1.20644900  |
| H  | -4.72138600 | -2.05776600 | 0.18273100  |
| H  | -3.18596500 | -2.61547000 | -0.54621500 |
| C  | -4.05660200 | 0.69520000  | 1.20880300  |
| H  | -5.12984800 | 0.48878900  | 1.10643600  |
| H  | -3.72819800 | 0.41045800  | 2.21457600  |
| H  | -3.87965400 | 1.76794600  | 1.07347400  |
| C  | -3.88640400 | 0.21128000  | -1.62548400 |
| H  | -3.43487400 | -0.37099600 | -2.43641200 |
| H  | -4.96583000 | 0.01381300  | -1.59471100 |
| H  | -3.71868600 | 1.27568300  | -1.82457600 |
| C  | 1.64059500  | 1.41292100  | 1.25299700  |
| H  | 1.32139600  | 1.82143700  | 2.22830100  |
| H  | 2.71660100  | 1.66739600  | 1.35083000  |
| H  | 1.10334800  | 2.35527500  | 1.08663900  |
| C  | 1.38706300  | 2.18920600  | -1.71182300 |
| H  | 1.80879200  | 2.39767300  | -2.70241200 |
| H  | 0.29340000  | 2.22338400  | -1.79788800 |
| H  | 1.70087000  | 2.99628900  | -1.03719800 |



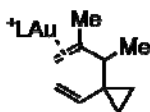

Gtot(B3LYP)=-986.798849  
 Gtot(M06-2X)=-986.350628  
 Gtot(M06)=-986.322158

## XYZ Coordinates

|    |             |             |             |
|----|-------------|-------------|-------------|
| C  | -2.18085800 | 0.61617600  | -0.45728400 |
| C  | -1.56700000 | -0.57496200 | 0.25209200  |
| C  | -1.05215300 | -1.63042400 | -0.46386800 |
| C  | -5.05030800 | -1.58472200 | -0.65029600 |
| C  | -4.26693300 | -0.76301400 | -0.74581500 |
| C  | -3.70635600 | 0.53465300  | -0.27647500 |
| H  | -0.82095200 | -2.57350000 | 0.03639900  |
| H  | -5.34872700 | -1.37115700 | 0.97644200  |
| H  | -5.43118400 | -2.50735600 | -0.48350500 |
| H  | -3.98728600 | -1.03561200 | -1.76953500 |
| H  | -1.14934100 | -1.65832500 | -1.55103000 |
| Au | 0.91509700  | -0.52666400 | -0.18039800 |
| P  | 3.07156300  | 0.38486900  | -0.04053500 |
| C  | -4.55040600 | 1.75222200  | -0.56357800 |
| H  | -4.06514400 | 2.68430300  | -0.84741600 |
| H  | -5.50273300 | 1.57204600  | -1.05986500 |
| C  | -4.39119200 | 1.26207300  | 0.84278300  |
| H  | -5.24518500 | 0.78964700  | 1.32460100  |
| H  | -3.78270300 | 1.86033900  | 1.51876000  |
| H  | -1.98363800 | 0.48524800  | -1.53563400 |
| C  | -1.54916500 | 1.93841400  | -0.03128100 |
| H  | -0.47109800 | 1.93151200  | -0.24671400 |
| H  | -1.98129100 | 2.77629500  | -0.58939500 |
| H  | -1.66894000 | 2.14494400  | 1.03890100  |
| C  | -1.69212600 | -0.64851200 | 1.73934600  |
| H  | -2.75799000 | -0.71991800 | 2.00171000  |
| H  | -1.17438700 | -1.52344400 | 2.14682600  |
| H  | -1.30233500 | 0.25236000  | 2.22948500  |
| C  | 3.13800100  | 1.80461700  | 1.09711800  |
| H  | 2.83917300  | 1.48671700  | 2.10191800  |
| H  | 4.15617900  | 2.21287900  | 1.13050700  |
| H  | 2.44548200  | 2.58120300  | 0.75302300  |
| C  | 3.70495300  | 1.01327500  | -1.62609700 |
| H  | 3.02411200  | 1.77708300  | -2.01738400 |
| H  | 4.70080700  | 1.45191100  | -1.48222200 |
| H  | 3.77033100  | 0.19477400  | -2.35111500 |
| C  | 4.33720400  | -0.77640100 | 0.55891100  |
| H  | 5.31215300  | -0.27450700 | 0.60331400  |
| H  | 4.06662100  | -1.13320300 | 1.55857300  |
| H  | 4.40178500  | -1.63609700 | -0.11668800 |

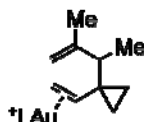

Gtot(B3LYP)=-986.79992  
 Gtot(M06-2X)=-986.350436  
 Gtot(M06)=-986.321323

## XYZ Coordinates

|    |             |             |              |
|----|-------------|-------------|--------------|
| C  | 2.32583100  | -0.84199200 | 0.49775900   |
| C  | 1.58618300  | -1.18229700 | -0.73697400  |
| C  | 0.77453800  | -2.26368000 | -0.96095400  |
| C  | 2.27012000  | 2.27620600  | -1.15664600  |
| C  | 3.00954500  | 1.37080300  | -0.51090400  |
| C  | 2.47120100  | 0.67107200  | 0.72175800   |
| H  | 0.45077100  | -2.49561000 | -1.97513900  |
| H  | 1.78593700  | -0.52463500 | -1.58897000  |
| H  | 1.26063500  | 2.52951700  | -0.82799000  |
| H  | 2.64747100  | 2.80410700  | -2.03235800  |
| H  | 0.61981600  | -3.04049500 | -0.21110800  |
| H  | 1.44521700  | 1.05235100  | 0.88343200   |
| C  | 2.22919300  | -1.77974500 | 1.66736100   |
| H  | 2.30696400  | -1.34639300 | 2.66166900   |
| H  | 1.53567000  | -2.61683200 | 1.61040800   |
| C  | 3.45649300  | -1.80723600 | 0.82260500   |
| H  | 3.59736400  | -2.64664200 | 0.14322200   |
| H  | 4.37804800  | -1.39161000 | 1.22675100   |
| Au | -0.73652100 | -0.62430600 | -0.35609800  |
| P  | -2.53643300 | 0.74449600  | 0.27517100   |
| C  | 3.28484200  | 1.05530000  | 1.95585500   |
| H  | 4.30643500  | 0.65475600  | 1.93313100   |
| H  | 3.36392900  | 2.14788700  | 2.01136000   |
| H  | 2.80781200  | 0.71524800  | 2.88231000   |
| C  | 4.38949600  | 1.80616000  | -0.96843000  |
| H  | 4.45441800  | -0.06021400 | -1.23074800  |
| H  | 4.68295800  | 1.58970700  | -1.84858200  |
| H  | 5.13934400  | 1.17788800  | -0.18323600  |
| C  | -1.98785800 | 2.26701900  | 1.10831100   |
| H  | -2.85804900 | 2.87025200  | 1.39746800   |
| H  | -1.40990000 | 2.00779100  | 2.00239500   |
| H  | -1.35040100 | 2.84903100  | 0.43333800   |
| C  | -3.57796600 | 1.29704700  | -1.111008500 |
| H  | -4.01019300 | 0.42806900  | -1.61789500  |
| H  | -4.38630800 | 1.93854900  | -0.73652800  |
| H  | -2.97043400 | 1.85935500  | -1.82730700  |
| C  | -3.67193100 | -0.06330900 | 1.44552700   |
| H  | -4.48268700 | 0.62477000  | 1.71636900   |
| H  | -4.09677000 | -0.96348200 | 0.98838600   |
| H  | -3.12282100 | -0.35192700 | 2.34838200   |

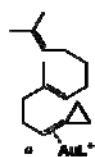

Gtot(B3LYP)=1221.309281  
Gtot(M06-2X)=1220.734439  
Gtot(M06)=1220.62633

## XYZ Coordinates

|    |             |             |             |
|----|-------------|-------------|-------------|
| C  | 0.78828900  | 1.15113500  | 0.41310500  |
| C  | 0.85962100  | 0.25424200  | -0.60766100 |
| C  | 1.22446400  | -1.18822800 | -0.41995500 |
| C  | 2.73192700  | -1.37357500 | -0.69159800 |
| C  | 3.59159700  | -0.70318400 | 0.34641000  |
| C  | 4.16596300  | 0.48028200  | 0.08983400  |
| H  | 0.64798800  | -1.82081100 | -1.10838500 |
| H  | 0.87792300  | 0.64424800  | -1.63111300 |
| H  | 2.96016400  | -0.97785000 | -1.69291300 |
| H  | 2.93931400  | -2.45457100 | -0.71991400 |
| H  | 0.97921800  | -1.50775400 | 0.60367100  |
| H  | 4.01839100  | 0.90104300  | -0.91302800 |
| C  | 0.96413600  | 2.54413400  | 0.82497600  |
| H  | 1.87197300  | 3.04417200  | 0.48527100  |
| H  | 0.09478000  | 3.19370200  | 0.92031800  |
| C  | 1.08813000  | 1.39824300  | 1.82521300  |
| H  | 0.29104500  | 1.30296500  | 2.56233300  |
| H  | 2.08010000  | 1.11686700  | 2.18191500  |
| Au | -1.41229400 | 0.51018500  | -0.08272300 |
| P  | -3.75051500 | 0.29792300  | -0.02373000 |
| C  | 3.72588900  | -1.45305400 | 1.63591500  |
| H  | 4.40740900  | -0.97269700 | 2.34691500  |
| H  | 2.75300800  | -1.58839700 | 2.13442600  |
| H  | 4.11723900  | -2.46370200 | 1.44167700  |
| C  | 5.00781000  | 1.32794300  | 0.99212800  |
| H  | 4.56897600  | 2.33924600  | 1.01845700  |
| H  | 4.97959600  | 0.96282000  | 2.02978500  |
| C  | -4.42442800 | -0.49078600 | -1.51908700 |
| H  | -5.51657700 | -0.56461000 | -1.44057500 |
| H  | -4.16218400 | 0.10316000  | -2.40127500 |
| H  | -3.99908600 | -1.49410200 | -1.62990300 |
| C  | -4.35035300 | -0.71489800 | 1.36350100  |
| H  | -5.44497000 | -0.78364400 | 1.32811900  |
| H  | -3.92023100 | -1.72017900 | 1.29717300  |
| H  | -4.04433700 | -0.26227300 | 2.31276900  |
| C  | -4.62665400 | 1.88610600  | 0.11971800  |
| H  | -5.70993700 | 1.71125800  | 0.13777300  |
| H  | -4.32467200 | 2.39435200  | 1.04175100  |
| H  | -4.37554800 | 2.52459500  | -0.73415000 |
| C  | 6.46870800  | 1.45451300  | 0.54596400  |
| H  | 6.50331000  | 1.65272200  | -0.53868600 |
| H  | 6.91203500  | 2.33603500  | 1.03140500  |
| C  | 7.33561900  | 0.23742500  | 0.87074800  |
| H  | 8.38439600  | 0.50557300  | 0.65486800  |
| H  | 7.29432300  | 0.05021600  | 1.95531200  |
| C  | 6.97522300  | -0.99411300 | 0.09864000  |
| H  | 6.72835800  | -0.81312400 | -0.95397500 |
| C  | 6.93748300  | -2.26347200 | 0.52453100  |
| C  | 7.25691900  | -2.71068700 | 1.91927100  |
| H  | 7.42812100  | -1.88257500 | 2.61591400  |
| H  | 6.44342400  | -3.33118300 | 2.32598000  |
| H  | 8.15726500  | -3.34440700 | 1.92777300  |
| C  | 6.56436400  | -3.37613900 | -0.41001500 |
| H  | 6.31923600  | -3.00617300 | -1.41379300 |
| H  | 7.37872300  | -4.11122300 | -0.50600100 |
| H  | 5.69348600  | -3.93537900 | -0.03238600 |

0

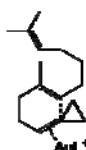

TS-1

Gtot(B3LYP)=1221.277133  
Gtot(M06-2X)=1220.707799  
Gtot(M06)=1220.605024

## XYZ Coordinates

|    |             |             |             |
|----|-------------|-------------|-------------|
| C  | 1.33473700  | -0.24870800 | 1.34827500  |
| C  | 1.02726300  | 0.67804100  | 0.31149200  |
| C  | 1.60445300  | 0.28107800  | -1.02027100 |
| C  | 3.16389900  | 0.22203200  | -0.90605100 |
| C  | 3.54314900  | -0.65712800 | 0.22627100  |
| C  | 3.54501900  | -0.13293600 | 1.49812600  |
| H  | 1.33911500  | 0.98940600  | -1.81476200 |
| H  | 1.27396600  | 1.71341300  | 0.59154300  |
| H  | 3.53806400  | 1.24311900  | -0.75156100 |
| H  | 3.57008600  | -0.15478000 | -1.85390500 |
| H  | 1.23415200  | -0.70898000 | -1.32755900 |
| H  | 3.49872700  | 0.95852600  | 1.56656400  |
| C  | 0.85051000  | -0.51697700 | 2.71151400  |
| H  | 1.55287000  | -0.59742200 | 3.53834200  |
| H  | -0.10590700 | -0.07279200 | 2.98612900  |
| C  | 0.90752200  | -1.62301800 | 1.67227300  |
| H  | -0.01059200 | -1.98523100 | 1.20808100  |
| H  | 1.65687900  | -2.39576500 | 1.84116100  |
| Au | -1.14400200 | 0.73411200  | 0.16192000  |
| P  | -3.48351200 | 0.89060000  | -0.09669500 |
| C  | 3.72994900  | -2.09900200 | -0.08700500 |
| H  | 2.80471500  | -2.51669800 | -0.51574800 |
| H  | 4.50545300  | -2.20902800 | -0.85759100 |
| H  | 4.01821600  | -2.70846100 | 0.77465300  |
| C  | 4.09173700  | -0.78846300 | 2.72889000  |
| H  | 3.47900400  | -0.50044800 | 3.59535400  |
| H  | 4.04899100  | -1.88545000 | 2.66591900  |
| C  | -4.01357800 | 1.14378600  | -1.82239900 |
| H  | -5.10737000 | 1.21763200  | -1.87444500 |
| H  | -3.56954200 | 2.06591800  | -2.21348100 |
| H  | -3.67751500 | 0.30312000  | -2.43934300 |
| C  | -4.40975600 | -0.58031500 | 0.45348400  |
| H  | -5.48672700 | -0.42112400 | 0.31237800  |
| H  | -4.09429500 | -1.45458900 | -0.12662000 |
| H  | -4.20735900 | -0.77041300 | 1.51327000  |
| C  | -4.23865500 | 2.27427600  | 0.81947700  |
| H  | -5.32321100 | 2.29133000  | 0.65071100  |
| H  | -4.04038800 | 2.16026800  | 1.89090400  |
| H  | -3.80465200 | 3.22158500  | 0.48074500  |
| C  | 5.53132100  | -0.34970000 | 3.03421100  |
| H  | 5.57301800  | 0.75151400  | 3.06710800  |
| H  | 5.77440100  | -0.69347400 | 4.04908800  |
| C  | 6.59745500  | -0.87060600 | 2.07091900  |
| H  | 7.58066700  | -0.68308200 | 2.53489300  |
| H  | 6.51426600  | -1.96668300 | 1.99742700  |
| C  | 6.56774800  | -0.23305300 | 0.71329000  |
| H  | 6.26699000  | 0.82161900  | 0.70583800  |
| C  | 6.90370300  | -0.78284100 | -0.46225900 |
| C  | 7.37747500  | -2.19414700 | -0.63594900 |
| H  | 7.27102800  | -2.80563300 | 0.26697600  |
| H  | 6.83439800  | -2.69457800 | -1.45271100 |
| H  | 8.43953300  | -2.21014600 | -0.92483500 |
| C  | 6.83804400  | 0.00878200  | -1.73328100 |
| H  | 6.52215700  | 1.04521000  | -1.56034300 |
| H  | 7.81341300  | 0.02856900  | -2.24307700 |
| H  | 6.13218600  | -0.44985200 | -2.44535400 |

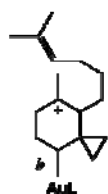

Gtot(B3LYP)=-1221.279329  
Gtot(M06-2X)=-1220.716232  
Gtot(M06)=-1220.617252

## XYZ Coordinates

|    |             |             |             |
|----|-------------|-------------|-------------|
| C  | 1.87112400  | 0.78384900  | 0.54176200  |
| C  | 1.08538300  | -0.13664600 | -0.35683500 |
| C  | 1.45756600  | -1.57106800 | -0.07406300 |
| C  | 3.02563800  | -1.78800300 | -0.20327600 |
| C  | 3.61265600  | -0.82094400 | 0.71695000  |
| C  | 3.44832000  | 0.59914700  | 0.33926900  |
| H  | 1.00026400  | -2.27501700 | -0.78170600 |
| H  | 1.35612500  | 0.09563800  | -1.40281600 |
| H  | 3.28995000  | -1.57938100 | -1.24763100 |
| H  | 3.26883300  | -2.82569900 | 0.05018200  |
| H  | 1.15296200  | -1.88037200 | 0.93742600  |
| H  | 3.59610200  | 0.70279600  | -0.74736700 |
| C  | 1.35015600  | 2.15941800  | 0.84916700  |
| H  | 2.03472800  | 2.99579000  | 0.96159400  |
| H  | 0.40217800  | 2.42230000  | 0.38116100  |
| C  | 1.36303500  | 1.10662600  | 1.91817800  |
| H  | 0.42282300  | 0.64456700  | 2.22221800  |
| H  | 2.07732900  | 1.25302000  | 2.72905700  |
| Au | -1.03850500 | 0.06342000  | -0.28171600 |
| P  | -3.41470000 | 0.28934900  | -0.23179000 |
| C  | 3.77824400  | -1.21562900 | 2.13119300  |
| H  | 2.83717300  | -0.96407600 | 2.65094600  |
| H  | 3.93988600  | -2.29256500 | 2.24272400  |
| H  | 4.56798600  | -0.66303400 | 2.64998900  |
| C  | 4.33974000  | 1.61734300  | 1.05280700  |
| H  | 3.91582400  | 2.61523000  | 0.87813900  |
| H  | 4.31615600  | 1.46616300  | 2.14297800  |
| C  | -4.23095500 | 0.23391900  | -1.86430000 |
| H  | -5.31476000 | 0.36934500  | -1.75408000 |
| H  | -3.83123100 | 1.02738000  | -2.50567900 |
| H  | -4.03517200 | -0.73267300 | -2.34208300 |
| C  | -4.29659400 | -0.98252700 | 0.73828600  |
| H  | -5.37742000 | -0.79041400 | 0.72544900  |
| H  | -4.10129300 | -1.97376700 | 0.31382200  |
| H  | -3.93969200 | -0.96993600 | 1.77425000  |
| C  | -3.99445200 | 1.86310300  | 0.49206200  |
| H  | -5.09152800 | 1.90399900  | 0.49293500  |
| H  | -3.62868400 | 1.95162600  | 1.52128000  |
| H  | -3.60191000 | 2.70441200  | -0.09023400 |
| C  | 5.77383000  | 1.63951200  | 0.55105300  |
| H  | 5.77433200  | 1.85719100  | -0.52991700 |
| H  | 6.28628500  | 2.48446000  | 1.03018300  |
| C  | 6.57985100  | 0.37105700  | 0.80757900  |
| H  | 7.63241000  | 0.57453400  | 0.55124500  |
| H  | 6.58448300  | 0.14451700  | 1.88491300  |
| C  | 6.12296500  | -0.80613900 | -0.00078200 |
| H  | 5.80050500  | -0.57156300 | -1.02150900 |
| C  | 6.25907500  | -2.11581600 | 0.31171900  |
| C  | 6.78078100  | -2.61672100 | 1.61890800  |
| H  | 6.90759400  | -1.83672100 | 2.37593000  |
| H  | 6.12242600  | -3.39794900 | 2.02762800  |
| H  | 7.75990100  | -3.09532500 | 1.46750400  |
| C  | 5.93769700  | -3.18571000 | -0.67922700 |
| H  | 5.53815500  | -2.78651900 | -1.61866000 |
| H  | 6.84252200  | -3.76599000 | -0.91366400 |
| H  | 5.21657500  | -3.90835200 | -0.26566600 |

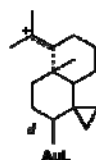

TS-3

Gtot(B3LYP)=-1221.275451  
Gtot(M06-2X)=-1220.714576  
Gtot(M06)=-1220.61719

## XYZ Coordinates

|    |             |             |             |
|----|-------------|-------------|-------------|
| C  | 1.92592100  | 0.68278900  | 0.90635500  |
| C  | 1.18543500  | 0.14420500  | -0.29766800 |
| C  | 1.61787600  | -1.28207600 | -0.56959500 |
| C  | 3.17182200  | -1.39102600 | -0.72454400 |
| C  | 3.76802600  | -0.83348500 | 0.50576700  |
| C  | 3.49351900  | 0.62830800  | 0.70739400  |
| H  | 1.18383400  | -1.67406300 | -1.49962200 |
| H  | 1.47839800  | 0.76047200  | -1.16842400 |
| H  | 3.45548400  | -0.80341000 | -1.60819400 |
| H  | 3.44504900  | -2.44078400 | -0.88292500 |
| H  | 1.29772900  | -1.95761100 | 0.23931600  |
| H  | 3.66825300  | 1.14525600  | -0.25090700 |
| C  | 1.33441300  | 1.83327400  | 1.67113500  |
| H  | 1.97290700  | 2.59383200  | 2.11353300  |
| H  | 0.38702600  | 2.21693300  | 1.29280900  |
| C  | 1.36371400  | 0.46341800  | 2.28283800  |
| H  | 0.43546600  | -0.10507400 | 2.35809700  |
| H  | 2.04829200  | 0.32286300  | 3.12000100  |
| Au | -0.94094400 | 0.24136000  | -0.24359200 |
| P  | -3.33226100 | 0.33505400  | -0.25124800 |
| C  | 3.81239200  | -1.73307600 | 1.68784000  |
| H  | 2.80514600  | -1.72200400 | 2.13543200  |
| H  | 4.03559400  | -2.76873900 | 1.41050300  |
| H  | 4.50022600  | -1.40452100 | 2.47308700  |
| C  | 4.31620700  | 1.33532200  | 1.78092400  |
| H  | 3.88720400  | 2.33081400  | 1.94166600  |
| H  | 4.24769200  | 0.81134900  | 2.74649800  |
| C  | -4.17736200 | -1.28159700 | -0.35089500 |
| H  | -5.26651800 | -1.14387300 | -0.34596400 |
| H  | -3.88259200 | -1.79780300 | -1.27151700 |
| H  | -3.88843500 | -1.90264500 | 0.50451200  |
| C  | -4.06885800 | 1.11251200  | 1.22925700  |
| H  | -5.16346400 | 1.13126400  | 1.14741000  |
| H  | -3.78291700 | 0.54673200  | 2.12323000  |
| H  | -3.69559100 | 2.13769200  | 1.33186500  |
| C  | -4.04911700 | 1.28364200  | -1.63843500 |
| H  | -5.14512400 | 1.28812900  | -1.57598600 |
| H  | -3.68177400 | 2.31575400  | -1.60717000 |
| H  | -3.74264700 | 0.83444800  | -2.58990500 |
| C  | 5.77526900  | 1.51698500  | 1.39077100  |
| H  | 5.83247900  | 2.13149800  | 0.47730000  |
| H  | 6.28522600  | 2.08823800  | 2.17740100  |
| C  | 6.51720300  | 0.20968100  | 1.16579800  |
| H  | 7.58223900  | 0.42506200  | 0.98517800  |
| H  | 6.49294200  | -0.39494300 | 2.08483000  |
| C  | 6.00200400  | -0.56396100 | -0.01523700 |
| H  | 5.73606000  | 0.04114000  | -0.88867700 |
| C  | 6.24152000  | -1.88908300 | -0.25456700 |
| C  | 6.78816600  | -2.82639400 | 0.76428300  |
| H  | 6.83528200  | -2.41205900 | 1.77494500  |
| H  | 6.21043300  | -3.76186500 | 0.78531300  |
| H  | 7.81110000  | -3.11019700 | 0.47354300  |
| C  | 6.01148200  | -2.48595100 | -1.59772000 |
| H  | 5.59784900  | -1.77423700 | -2.31932600 |
| H  | 6.96995400  | -2.85377300 | -1.99386700 |
| H  | 5.35667100  | -3.36841900 | -1.53847500 |



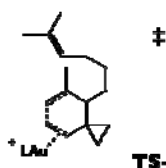

Gtot(B3LYP)=-1221.275884  
Gtot(M06-2X)=-1220.710392  
Gtot(M06)=-1220.609525

## XYZ Coordinates

|    |             |             |             |
|----|-------------|-------------|-------------|
| C  | 1.78663000  | 0.85263500  | 0.59000600  |
| C  | 1.01508200  | 0.16107400  | -0.48851600 |
| C  | 1.11029400  | -1.25192500 | -0.47953500 |
| C  | 3.20919500  | -1.64704200 | -0.72179600 |
| C  | 3.45183600  | -0.94048200 | 0.42266800  |
| C  | 3.32741300  | 0.55249900  | 0.39436100  |
| H  | 0.85242100  | -1.82885400 | -1.36906900 |
| H  | 1.18377700  | 0.60601300  | -1.48001600 |
| H  | 3.27109300  | -1.16390100 | -1.69724200 |
| H  | 3.24716900  | -2.73689300 | -0.72077700 |
| H  | 0.99644300  | -1.79221500 | 0.46188500  |
| H  | 3.56190200  | 0.89885500  | -0.62651700 |
| C  | 1.30160900  | 2.18144900  | 1.08565300  |
| H  | 2.01073900  | 2.96593700  | 1.33982000  |
| H  | 0.37692400  | 2.55321900  | 0.64505800  |
| C  | 1.23049400  | 0.97794200  | 1.98075200  |
| H  | 0.25947900  | 0.52864200  | 2.19262600  |
| H  | 1.92707700  | 0.95230100  | 2.81843900  |
| Au | -1.17362100 | 0.18769300  | -0.33688100 |
| P  | -3.52469500 | 0.36360300  | -0.18879700 |
| C  | 3.52831000  | -1.64378300 | 1.73410700  |
| H  | 2.70962900  | -1.32711200 | 2.39828100  |
| H  | 3.47842200  | -2.73192500 | 1.60821400  |
| H  | 4.46470800  | -1.40589100 | 2.25570300  |
| C  | 4.23913400  | 1.31442100  | 1.36483100  |
| H  | 3.80451500  | 2.30843800  | 1.52470300  |
| H  | 4.24979700  | 0.83269800  | 2.35477600  |
| C  | -4.42917400 | -0.64446200 | -1.40972100 |
| H  | -5.51082500 | -0.50702100 | -1.28332400 |
| H  | -4.14134200 | -0.34380500 | -2.42315100 |
| H  | -4.17965200 | -1.70235700 | -1.27269200 |
| C  | -4.20626000 | -0.14534700 | 1.42416200  |
| H  | -5.29798800 | -0.03155500 | 1.42485000  |
| H  | -3.95016900 | -1.19247400 | 1.61952400  |
| H  | -3.77629500 | 0.47513600  | 2.21820000  |
| C  | -4.15211500 | 2.05758900  | -0.43661600 |
| H  | -5.24649400 | 2.06953800  | -0.35330900 |
| H  | -3.72357500 | 2.72420500  | 0.31987200  |
| H  | -3.86005000 | 2.41897900  | -1.42872700 |
| C  | 5.67635700  | 1.54336300  | 0.88809700  |
| H  | 5.66119600  | 1.85838100  | -0.16896900 |
| H  | 6.07105800  | 2.40327100  | 1.44795700  |
| C  | 6.66494700  | 0.39012100  | 1.06047400  |
| H  | 7.67663700  | 0.80285300  | 0.90580900  |
| H  | 6.64505600  | 0.05274200  | 2.10863700  |
| C  | 6.46001500  | -0.75398200 | 0.11605700  |
| H  | 6.16123000  | -0.46342000 | -0.89941500 |
| C  | 6.64181100  | -2.06172400 | 0.34993000  |
| C  | 7.07565900  | -2.64485300 | 1.66045200  |
| H  | 7.18650000  | -1.90278300 | 2.45861300  |
| H  | 6.35986400  | -3.40947100 | 2.00117300  |
| H  | 8.04184200  | -3.16030500 | 1.55062100  |
| C  | 6.40670600  | -3.07863100 | -0.72475300 |
| H  | 6.11412800  | -2.61757000 | -1.67644000 |
| H  | 7.30647700  | -3.68749100 | -0.90129000 |
| H  | 5.61400400  | -3.78480600 | -0.42710000 |

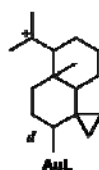

Gtot(B3LYP)=-1221.2788  
Gtot(M06-2X)=-1220.724755  
Gtot(M06)=-1220.628519

## XYZ Coordinates

|    |             |             |             |
|----|-------------|-------------|-------------|
| C  | 2.01247800  | 0.82891400  | 0.10340400  |
| C  | 1.13462600  | -0.32881800 | -0.34861300 |
| C  | 1.55768400  | -1.60940100 | 0.36476600  |
| C  | 3.04536800  | -1.90472400 | 0.17545000  |
| C  | 3.93454100  | -0.74906600 | 0.64006000  |
| C  | 3.51253500  | 0.55115600  | -0.10994500 |
| H  | 0.98596700  | -2.47042000 | -0.01247000 |
| H  | 1.33928600  | -0.47641200 | -1.42801400 |
| H  | 3.22314900  | -2.09048400 | -0.89768500 |
| H  | 3.30596700  | -2.83020700 | 0.71316800  |
| H  | 1.32609300  | -1.54403500 | 1.44101200  |
| H  | 3.61731400  | 0.31726700  | -1.18787500 |
| C  | 1.48769100  | 2.22136300  | -0.11309400 |
| H  | 2.16525100  | 3.03432500  | -0.36527200 |
| H  | 0.50880300  | 2.29785000  | -0.58772700 |
| C  | 1.56338300  | 1.65953300  | 1.27598900  |
| H  | 0.63877400  | 1.35956400  | 1.77260500  |
| H  | 2.31003900  | 2.09093700  | 1.94290900  |
| Au | -0.96871600 | -0.06608700 | -0.20209900 |
| P  | -3.35930500 | 0.15844500  | -0.05358000 |
| C  | 3.86266200  | -0.60953300 | 2.15607000  |
| H  | 2.87616400  | -0.22984800 | 2.44216700  |
| H  | 3.98935900  | -1.57936700 | 2.65689800  |
| H  | 4.59815000  | 0.09098700  | 2.56924100  |
| C  | 4.44732100  | 1.72569600  | 0.17213300  |
| H  | 4.10450200  | 2.60793300  | -0.38169500 |
| H  | 4.42416500  | 1.99837800  | 1.23926800  |
| C  | -3.98653400 | 1.86901000  | -0.21340000 |
| H  | -5.08117500 | 1.88707400  | -0.13048500 |
| H  | -3.55419600 | 2.49524500  | 0.57533000  |
| H  | -3.69133100 | 2.28106000  | -1.18509000 |
| C  | -4.30684000 | -0.76027000 | -1.31995400 |
| H  | -5.38492900 | -0.60304700 | -1.18399200 |
| H  | -4.01532700 | -0.41792000 | -2.31943100 |
| H  | -4.08541700 | -1.83073700 | -1.24085200 |
| C  | -4.09340000 | -0.41488400 | 1.52065300  |
| H  | -5.18244800 | -0.27571000 | 1.51158500  |
| H  | -3.86618000 | -1.47688900 | 1.66782100  |
| H  | -3.66398200 | 0.15105300  | 2.35518300  |
| C  | 5.87605700  | 1.41496600  | -0.24285300 |
| H  | 5.91813700  | 1.26984600  | -1.33469500 |
| H  | 6.53600600  | 2.26219000  | -0.01472000 |
| C  | 6.39542000  | 0.16964900  | 0.44968000  |
| H  | 7.41182100  | -0.06519700 | 0.10320500  |
| H  | 6.46857000  | 0.34789400  | 1.53136200  |
| C  | 5.48512800  | -1.02629800 | 0.14890600  |
| H  | 5.36745400  | -1.14648400 | -0.94017700 |
| C  | 5.94484800  | -2.28299600 | 0.69865400  |
| C  | 6.68546900  | -2.33805700 | 1.96102000  |
| H  | 6.32589000  | -1.61233200 | 2.69944000  |
| H  | 6.74044700  | -3.34433600 | 2.38482500  |
| H  | 7.71653600  | -2.01493700 | 1.72245600  |
| C  | 5.74948700  | -3.54121100 | -0.02079000 |
| H  | 5.16867800  | -3.45128400 | -0.94056200 |
| H  | 6.75993900  | -3.91144200 | -0.27397400 |
| H  | 5.33556700  | -4.31357800 | 0.64357700  |

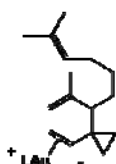

Gtot(B3LYP)=-1221.309557  
 Gtot(M06-2X)=-1220.724755  
 Gtot(M06)=-1220.637616

## XYZ Coordinates

|    |             |             |             |
|----|-------------|-------------|-------------|
| C  | 1.73460100  | -0.08602000 | -0.03051600 |
| C  | 0.76982400  | -0.50399300 | -1.08179100 |
| C  | 0.05471300  | -1.66957700 | -1.11900200 |
| C  | 3.53730800  | -0.91440700 | -2.88099500 |
| C  | 3.47562600  | -1.05167300 | -1.55418900 |
| C  | 3.12671900  | 0.12548200  | -0.66209400 |
| H  | -0.43512200 | -1.98384800 | -2.04195600 |
| H  | 0.75264900  | 0.13501800  | -1.97136200 |
| H  | 3.36002200  | 0.04681100  | -3.36498900 |
| H  | 3.77374700  | -1.75578000 | -3.53232400 |
| H  | 0.16119300  | -2.41944800 | -0.33325400 |
| H  | 3.04030100  | 1.01702000  | -1.31032800 |
| C  | 1.26414000  | 0.85721800  | 1.04803800  |
| H  | 1.95380300  | 1.62893300  | 1.38475000  |
| H  | 0.22033000  | 1.17618200  | 1.03438100  |
| C  | 1.56490800  | -0.57318600 | 1.37807500  |
| H  | 0.72671100  | -1.23139200 | 1.60580100  |
| H  | 2.46085500  | -0.78578300 | 1.95918000  |
| Au | -1.60969800 | -0.27246700 | -0.39332800 |
| P  | -3.54936100 | 0.79816300  | 0.38260800  |
| C  | 3.73706500  | -2.36574800 | -0.88138400 |
| H  | 2.93054000  | -2.62618000 | -0.17958300 |
| H  | 3.83238400  | -3.17545300 | -1.61480200 |
| H  | 4.66639700  | -2.33699200 | -0.29047800 |
| C  | 4.23939000  | 0.38692300  | 0.35348000  |
| H  | 3.94300000  | 1.18123900  | 1.05605500  |
| H  | 4.40311500  | -0.51622500 | 0.96032500  |
| C  | -4.67832900 | 1.33632600  | -0.93835800 |
| H  | -5.55972800 | 1.82307700  | -0.50179900 |
| H  | -4.16292200 | 2.04189200  | -1.59880100 |
| H  | -4.99693400 | 0.46956100  | -1.52737400 |
| C  | -4.55209300 | -0.24123200 | 1.48880100  |
| H  | -5.43647200 | 0.31653200  | 1.82236000  |
| H  | -4.87058400 | -1.14608800 | 0.96014400  |
| H  | -3.95561000 | -0.53258200 | 2.36007400  |
| C  | -3.16818400 | 2.29604000  | 1.34355000  |
| H  | -4.09625000 | 2.76025500  | 1.70096000  |
| H  | -2.54136400 | 2.02902600  | 2.20185400  |
| H  | -2.62126000 | 3.00811700  | 0.71591300  |
| C  | 5.55713100  | 0.78500900  | -0.29742300 |
| H  | 5.78783600  | 0.09738200  | -1.12765100 |
| H  | 5.45818000  | 1.78544600  | -0.74694900 |
| C  | 6.71843000  | 0.76479700  | 0.70232100  |
| H  | 7.59612100  | 1.23888400  | 0.23725000  |
| H  | 6.46047400  | 1.38504700  | 1.57386800  |
| C  | 7.06808200  | -0.63496900 | 1.10436100  |
| H  | 7.56010400  | -1.22020700 | 0.31896800  |
| C  | 6.80339300  | -1.26309600 | 2.25865000  |
| C  | 6.11637500  | -0.63768300 | 3.43508200  |
| H  | 5.87258900  | 0.42008100  | 3.28835700  |
| H  | 5.17802500  | -1.16953900 | 3.65878900  |
| H  | 6.73777400  | -0.72094600 | 4.33941700  |
| C  | 7.18251800  | -2.69987800 | 2.46104600  |
| H  | 7.66349200  | -3.12933800 | 1.57360500  |
| H  | 7.87072800  | -2.81337300 | 3.31264100  |
| H  | 6.29777200  | -3.31025500 | 2.69952300  |

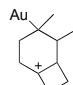

A2

## A1-TS

Gtot(M06)=-986.283095

## XYZ Coordinates

|    |             |             |             |
|----|-------------|-------------|-------------|
| C  | 1.41579000  | 0.77977400  | -0.51111700 |
| C  | 0.82125200  | -0.60356300 | -0.16401300 |
| C  | 1.22421100  | -0.95422700 | 1.27202000  |
| C  | 2.73709200  | -1.09182100 | 1.43893900  |
| C  | 3.49494800  | -0.08368700 | 0.69691500  |
| C  | 2.91714200  | 0.83017200  | -0.17562000 |
| H  | 0.74927100  | -1.89115200 | 1.59379000  |
| H  | 3.10931500  | -2.05985400 | 1.05072500  |
| H  | 3.06944200  | -1.09308100 | 2.48847000  |
| H  | 4.57937400  | -0.05879800 | 0.83187000  |
| H  | 0.86624700  | -0.17220700 | 1.96097500  |
| Au | -1.31257400 | -0.52886300 | -0.25739100 |
| P  | -3.71243300 | -0.49608000 | -0.37638700 |
| C  | 3.50948100  | 2.15105900  | 0.62527300  |
| H  | 2.66090700  | 2.78267300  | 0.88068300  |
| H  | 4.25705600  | 2.04521600  | 1.40759000  |
| C  | 3.85456900  | 1.87037300  | -0.76192100 |
| H  | 4.87565600  | 1.55467900  | -0.96974500 |
| H  | 3.39636200  | 2.48112900  | -1.53452300 |
| H  | 0.91650000  | 1.51994400  | 0.13689900  |
| C  | 1.31667800  | -1.68149200 | -1.13290000 |
| H  | 0.90322300  | -1.55421300 | -2.14160800 |
| H  | 2.41726400  | -1.70588600 | -1.24867300 |
| H  | 1.00962600  | -2.67814000 | -0.78290400 |
| C  | 1.17164500  | 1.18744300  | -1.96100000 |
| H  | 0.11950000  | 1.00292200  | -2.21682900 |
| H  | 1.36677500  | 2.25265100  | -2.13563700 |
| H  | 1.79396100  | 0.60874600  | -2.65684200 |
| C  | -4.40798800 | 0.89474300  | -1.33666500 |
| H  | -5.50390700 | 0.83598900  | -1.36216400 |
| H  | -4.10722700 | 1.84527800  | -0.88163900 |
| H  | -4.02154900 | 0.86300400  | -2.36183700 |
| C  | -4.44660600 | -1.97084500 | -1.16883100 |
| H  | -5.54060600 | -1.88486900 | -1.20202700 |
| H  | -4.06062000 | -2.07189600 | -2.18954300 |
| H  | -4.17181700 | -2.86833500 | -0.60298600 |
| C  | -4.58982900 | -0.39425600 | 1.22370500  |
| H  | -5.67595600 | -0.39199600 | 1.06370600  |
| H  | -4.31959200 | -1.25310200 | 1.84854400  |
| H  | -4.30046900 | 0.52303500  | 1.74882900  |

Gtot(M06)=-986.289013

## XYZ Coordinates

|    |             |             |             |
|----|-------------|-------------|-------------|
| C  | 1.57014400  | -0.64122700 | -0.45651600 |
| C  | 0.71253700  | 0.25460500  | 0.45617700  |
| C  | 1.07054800  | 1.71867200  | 0.16947100  |
| C  | 2.52682000  | 2.04789000  | 0.50648000  |
| C  | 3.48061500  | 1.03664700  | -0.04681000 |
| C  | 3.02872800  | -0.23940800 | -0.47899800 |
| H  | 0.42023700  | 2.39080400  | 0.74664200  |
| H  | 2.67932500  | 2.08038400  | 1.59507300  |
| H  | 2.81731300  | 3.04162000  | 0.13839600  |
| H  | 4.53410600  | 1.14335100  | 0.21830900  |
| H  | 0.87893800  | 1.95178700  | -0.89152600 |
| Au | -1.35445000 | -0.03780100 | 0.00796900  |
| P  | -3.69096900 | -0.31346500 | -0.48201400 |
| C  | 3.58827400  | 0.76044200  | -1.73239500 |
| H  | 2.73087000  | 1.02129600  | -2.34982400 |
| H  | 4.48375700  | 1.34210400  | -1.94443400 |
| C  | 3.93294400  | -0.73906900 | -1.49904500 |
| H  | 4.99012900  | -0.85779500 | -1.26521100 |
| H  | 3.52956100  | -1.47764900 | -2.18985000 |
| H  | 1.21157400  | -0.54787300 | -1.49797700 |
| C  | 0.95714500  | -0.06266100 | 1.93354000  |
| H  | 0.55745600  | -1.04337400 | 2.22189300  |
| H  | 2.02722300  | -0.06557900 | 2.21712600  |
| H  | 0.46051800  | 0.68579000  | 2.56795600  |
| C  | 1.52197400  | -2.12985500 | -0.09883900 |
| H  | 0.47139700  | -2.44359500 | -0.03858100 |
| H  | 2.02138900  | -2.74901300 | -0.85320200 |
| H  | 1.99017200  | -2.33397900 | 0.87212500  |
| C  | -4.07061700 | -1.48278200 | -1.83444700 |
| H  | -5.15530500 | -1.54917900 | -1.99004300 |
| H  | -3.59360300 | -1.14385700 | -2.76110700 |
| H  | -3.68077400 | -2.47626700 | -1.58565100 |
| C  | -4.69946500 | -0.92866100 | 0.91230500  |
| H  | -5.74982200 | -1.03351000 | 0.61067700  |
| H  | -4.31897200 | -1.90197700 | 1.24255800  |
| H  | -4.63347300 | -0.22697200 | 1.75155100  |
| C  | -4.55215000 | 1.21627200  | -0.99152800 |
| H  | -5.61433800 | 1.01347800  | -1.18163000 |
| H  | -4.46403200 | 1.97229200  | -0.20303400 |
| H  | -4.09194500 | 1.61096400  | -1.90457700 |

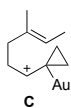

Gtot(M06)=-986.279359

## XYZ Coordinates

|    |             |             |             |
|----|-------------|-------------|-------------|
| C  | 1.33304800  | -1.36707200 | 2.71848600  |
| C  | 2.57190100  | -1.29410900 | 3.32416600  |
| C  | 3.71984200  | -0.40941200 | 3.05820400  |
| H  | 4.60575300  | -1.06192100 | 2.95540400  |
| H  | 2.76368800  | -1.97386000 | 4.16820400  |
| H  | 3.90931300  | 0.08277000  | 4.03037300  |
| C  | 0.71043800  | -2.84208100 | 2.96046400  |
| H  | 0.11858700  | -3.13378600 | 2.09630000  |
| H  | 1.40230900  | -3.59735800 | 3.32833700  |
| C  | 0.25056800  | -1.82288200 | 3.84268300  |
| H  | 0.59109800  | -1.80763700 | 4.87587500  |
| H  | -0.68858500 | -1.30782400 | 3.65473600  |
| Au | 0.62659100  | -0.33269700 | 1.02658800  |
| P  | -0.25801700 | 0.74202200  | -0.88750200 |
| C  | 3.66196600  | 0.63791100  | 1.96318700  |
| H  | 2.73046700  | 1.22323200  | 2.06986100  |
| H  | 4.46805200  | 1.36339300  | 2.15895400  |
| C  | 3.77888600  | 0.17935000  | 0.53266500  |
| C  | 3.87352300  | -1.11017600 | 0.18024800  |
| H  | 3.87988300  | -1.85984200 | 0.97614000  |
| C  | 3.75972300  | 1.32629100  | -0.43265500 |
| H  | 2.79395200  | 1.85613600  | -0.37937900 |
| H  | 4.52834500  | 2.06865700  | -0.17212800 |
| H  | 3.92661700  | 1.03012100  | -1.47323800 |
| C  | 3.94695400  | -1.68558700 | -1.19532200 |
| H  | 3.93117600  | -0.92701700 | -1.98594600 |
| H  | 4.85741600  | -2.28706900 | -1.32698200 |
| H  | 3.09949500  | -2.36462500 | -1.37259400 |
| C  | -0.27747600 | 2.56601500  | -0.81714000 |
| H  | -0.70610700 | 2.97651000  | -1.74054700 |
| H  | -0.87864100 | 2.89311100  | 0.03858900  |
| H  | 0.74168600  | 2.95061600  | -0.69254500 |
| C  | -1.99017700 | 0.29636200  | -1.24669200 |
| H  | -2.62626400 | 0.57751000  | -0.39988600 |
| H  | -2.33705300 | 0.81598100  | -2.14922100 |
| H  | -2.06776300 | -0.78586000 | -1.39888100 |
| C  | 0.62898700  | 0.35876100  | -2.43622900 |
| H  | 0.63950200  | -0.72579700 | -2.59379800 |
| H  | 0.13667900  | 0.84603000  | -3.28782300 |
| H  | 1.66466300  | 0.71311300  | -2.36960000 |

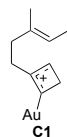

Gtot(M06)=-986.285649

## XYZ Coordinates

|    |             |             |             |
|----|-------------|-------------|-------------|
| C  | 0.74051000  | -1.45591700 | 0.39593100  |
| C  | 1.90534700  | -0.83962500 | 0.92661800  |
| C  | 1.94449500  | 0.59060100  | 1.37768300  |
| H  | 1.45331800  | 0.64257500  | 2.36157500  |
| H  | 2.68074100  | -1.48183000 | 1.36566800  |
| H  | 1.33393700  | 1.20511300  | 0.69886900  |
| C  | 1.99672100  | -1.27713100 | -0.70867000 |
| H  | 1.67452800  | -0.58210400 | -1.48065500 |
| H  | 3.06280300  | -1.50244900 | -0.74886500 |
| C  | 1.18707800  | -2.58284300 | -0.40408400 |
| H  | 1.85866600  | -3.32861200 | 0.02860100  |
| H  | 0.50463100  | -2.96822500 | -1.15864200 |
| Au | -1.06545000 | -0.44588300 | 0.07677800  |
| P  | -3.13681800 | 0.67488100  | -0.20531700 |
| C  | 3.37075700  | 1.13774100  | 1.49237000  |
| H  | 3.30682200  | 2.16898000  | 1.87360800  |
| H  | 3.91431800  | 0.55379700  | 2.25045700  |
| C  | 4.12696000  | 1.11512200  | 0.19171100  |
| C  | 5.16627400  | 0.28764000  | 0.01567100  |
| H  | 5.45576600  | -0.34508700 | 0.85971000  |
| C  | 3.63139100  | 2.05084300  | -0.86959000 |
| H  | 4.25346500  | 2.03707600  | -1.77103900 |
| H  | 2.60097200  | 1.81378700  | -1.17782100 |
| H  | 3.60407700  | 3.08439500  | -0.49296200 |
| C  | 5.97687000  | 0.14462000  | -1.23887200 |
| H  | 6.48215600  | 1.08106400  | -1.51542500 |
| H  | 6.75266000  | -0.61976700 | -1.12297900 |
| H  | 5.35790000  | -0.14735200 | -2.10017800 |
| C  | -2.96794500 | 2.43654600  | -0.64415800 |
| H  | -3.95907400 | 2.89325700  | -0.76285900 |
| H  | -2.41870000 | 2.96231900  | 0.14471300  |
| H  | -2.41084000 | 2.53176800  | -1.58267500 |
| C  | -4.18102300 | 0.67390000  | 1.28917400  |
| H  | -3.64870200 | 1.16348800  | 2.11221800  |
| H  | -5.11971600 | 1.20867600  | 1.09532800  |
| H  | -4.40596000 | -0.35777200 | 1.58154300  |
| C  | -4.20546400 | -0.01874600 | -1.50959600 |
| H  | -4.44511700 | -1.06187000 | -1.27550900 |
| H  | -5.13526000 | 0.56020800  | -1.58187600 |
| H  | -3.68242700 | 0.01357100  | -2.47160200 |

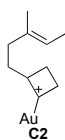

Gtot(M06)=-986.278299

## XYZ Coordinates

|    |             |             |             |
|----|-------------|-------------|-------------|
| C  | 0.33292500  | 0.92492000  | -0.93308600 |
| C  | 1.68755000  | 0.52122500  | -1.37384000 |
| C  | 2.52122500  | -0.39408300 | -0.49145100 |
| H  | 1.88501400  | -1.22717500 | -0.15503300 |
| H  | 1.53363400  | 0.04396300  | -2.36562300 |
| H  | 2.81297400  | 0.15914100  | 0.41475400  |
| C  | 1.99810000  | 2.02657600  | -1.61758900 |
| H  | 2.51177900  | 2.47193500  | -0.75918000 |
| H  | 2.52404900  | 2.28993000  | -2.53947600 |
| C  | 0.47329400  | 2.25960200  | -1.55863600 |
| H  | 0.01280700  | 2.23526200  | -2.56070100 |
| H  | 0.02898900  | 3.10773800  | -1.02379000 |
| Au | -1.02992700 | 0.05265400  | 0.28967600  |
| P  | -2.64629200 | -1.02730200 | 1.69016800  |
| C  | 3.75138400  | -0.95383300 | -1.21020100 |
| H  | 4.29006400  | -1.60644100 | -0.50431900 |
| H  | 3.40907300  | -1.59451100 | -2.03756400 |
| C  | 4.68158700  | 0.10531300  | -1.73979300 |
| C  | 4.78376100  | 0.30957100  | -3.06078100 |
| H  | 4.18161100  | -0.33608800 | -3.70892300 |
| C  | 5.43075800  | 0.87285600  | -0.69199000 |
| H  | 6.13557400  | 1.59986700  | -1.10778200 |
| H  | 4.74839400  | 1.42342800  | -0.02675800 |
| H  | 5.99843000  | 0.18696200  | -0.04534000 |
| C  | 5.60758300  | 1.32448000  | -3.78090200 |
| H  | 6.28857200  | 0.84546500  | -4.49874000 |
| H  | 4.96772400  | 1.99975500  | -4.36826100 |
| H  | 6.21349300  | 1.94521400  | -3.11169500 |
| C  | -4.08514500 | 0.00023000  | 2.13179700  |
| H  | -4.77651900 | -0.57464100 | 2.76119400  |
| H  | -3.75242600 | 0.88937400  | 2.67836900  |
| H  | -4.60441900 | 0.32056100  | 1.22197300  |
| C  | -1.97893900 | -1.59783300 | 3.28788100  |
| H  | -2.76966700 | -2.08819400 | 3.87017500  |
| H  | -1.16304300 | -2.30801500 | 3.11412200  |
| H  | -1.58857500 | -0.74452500 | 3.85298300  |
| C  | -3.36319300 | -2.52291500 | 0.93263700  |
| H  | -4.09126100 | -2.97767100 | 1.61641600  |
| H  | -3.86266500 | -2.25999800 | -0.00621300 |
| H  | -2.56765900 | -3.24467100 | 0.71762400  |

## C-TS3

Gtot(M06)=-986.270109

## XYZ Coordinates

|    |             |             |             |
|----|-------------|-------------|-------------|
| C  | 0.46684800  | 0.36715200  | 0.82836000  |
| C  | 1.85075300  | 0.13072800  | 0.61849600  |
| C  | 2.78371600  | -0.84313000 | 1.24926300  |
| H  | 2.18864000  | -1.64821100 | 1.70563200  |
| H  | 0.98659600  | -0.51206200 | -0.05848900 |
| H  | 3.26815100  | -0.31471000 | 2.08574500  |
| C  | 2.04886600  | 1.37303400  | -0.22985900 |
| H  | 2.70905600  | 2.10557800  | 0.24910100  |
| H  | 2.39617000  | 1.20820300  | -1.25489400 |
| C  | 0.53721900  | 1.62601500  | -0.02405200 |
| H  | -0.10555100 | 1.65688700  | -0.90935500 |
| H  | 0.31665400  | 2.50255300  | 0.59710200  |
| Au | -0.97721800 | -0.58904500 | 1.95987400  |
| P  | -2.63849000 | -1.64470900 | 3.29057000  |
| C  | 3.83873000  | -1.41330100 | 0.29563100  |
| H  | 4.38209500  | -2.19923100 | 0.84428900  |
| H  | 3.33183200  | -1.91131800 | -0.54471100 |
| C  | 4.81968900  | -0.39308500 | -0.22133700 |
| C  | 4.90459900  | -0.14850600 | -1.53627900 |
| H  | 4.22827700  | -0.71044700 | -2.18887900 |
| C  | 5.65723400  | 0.27422400  | 0.82934800  |
| H  | 6.49053900  | 0.84904200  | 0.41305800  |
| H  | 5.06364800  | 0.96696900  | 1.44579400  |
| H  | 6.07672100  | -0.47036500 | 1.52234100  |
| C  | 5.80097500  | 0.81284700  | -2.24205900 |
| H  | 6.36237500  | 0.31144900  | -3.04272900 |
| H  | 5.21624500  | 1.60832000  | -2.72754400 |
| H  | 6.52554400  | 1.29668700  | -1.57788100 |
| C  | -4.07101000 | -0.58652000 | 3.68059800  |
| H  | -4.79709200 | -1.14489500 | 4.28540500  |
| H  | -3.73816100 | 0.29575500  | 4.23835400  |
| H  | -4.54992600 | -0.25494500 | 2.75277000  |
| C  | -2.04703600 | -2.22222300 | 4.91578000  |
| H  | -2.86735800 | -2.70161600 | 5.46534900  |
| H  | -1.23322700 | -2.94276700 | 4.77868400  |
| H  | -1.67009200 | -1.37240500 | 5.49532500  |
| C  | -3.36503500 | -3.12861100 | 2.51847100  |
| H  | -4.12546000 | -3.56315200 | 3.17996100  |
| H  | -3.82690500 | -2.85971500 | 1.56213700  |
| H  | -2.58008600 | -3.86995200 | 2.33308100  |



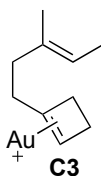

Gtot(M06)=-986.32065

## XYZ Coordinates

|    |             |             |             |
|----|-------------|-------------|-------------|
| C  | 1.32496900  | 1.16708100  | -0.87953700 |
| C  | 2.14929800  | 0.15505500  | -0.42188800 |
| C  | 2.58653200  | -1.15267300 | -0.98593900 |
| H  | 1.73080500  | -1.69510500 | -1.41084000 |
| H  | 0.78490300  | 1.28366100  | -1.82156000 |
| H  | 3.00450800  | -1.78356100 | -0.18901200 |
| C  | 2.74793500  | 1.02776300  | 0.66573300  |
| H  | 2.55715900  | 0.71596500  | 1.69987400  |
| H  | 3.82731500  | 1.18491200  | 0.53484000  |
| C  | 1.87099800  | 2.18355200  | 0.10909300  |
| H  | 2.46223900  | 2.96913300  | -0.37893400 |
| H  | 1.16372500  | 2.65341100  | 0.80147200  |
| Au | -0.16681900 | -0.10727100 | 0.34580000  |
| P  | -2.02540400 | -1.04405300 | 1.42302100  |
| C  | 3.62046700  | -0.93090900 | -2.11164000 |
| H  | 3.92768000  | -1.92403500 | -2.47543200 |
| H  | 3.11118800  | -0.42366500 | -2.94421300 |
| C  | 4.82054800  | -0.13401200 | -1.68531200 |
| C  | 5.00765600  | 1.11310200  | -2.13824700 |
| H  | 4.27910300  | 1.50769500  | -2.85247900 |
| C  | 5.74504000  | -0.80094100 | -0.71046800 |
| H  | 5.30261900  | -0.86894100 | 0.29644500  |
| H  | 5.96050000  | -1.83379500 | -1.02101800 |
| H  | 6.70054600  | -0.27449700 | -0.60857400 |
| C  | 6.12787900  | 2.02963700  | -1.74629500 |
| H  | 5.98737900  | 3.03012700  | -2.16943200 |
| H  | 6.20612200  | 2.14274300  | -0.65506800 |
| H  | 7.10402000  | 1.66393800  | -2.09771900 |
| C  | -1.57950600 | -2.28285100 | 2.67937100  |
| H  | -0.94471200 | -1.82310600 | 3.44435500  |
| H  | -2.48846900 | -2.67966300 | 3.14978900  |
| H  | -1.02699600 | -3.10242000 | 2.20716800  |
| C  | -3.05647000 | 0.17599600  | 2.29392500  |
| H  | -3.90410300 | -0.33077100 | 2.77248600  |
| H  | -2.46017200 | 0.68657400  | 3.05774300  |
| H  | -3.43230000 | 0.91963900  | 1.58294800  |
| C  | -3.15161600 | -1.90268100 | 0.28077600  |
| H  | -2.61287600 | -2.70686100 | -0.23205600 |
| H  | -3.99627400 | -2.32763400 | 0.83792600  |
| H  | -3.52864800 | -1.19722400 | -0.46757400 |

## 7. Crystallographic Data

**(S)-3,5-xylyl-PHANEPHOS(AuCl)<sub>2</sub> (4):** A suitable single crystal of **4** was selected, covered in oil, and mounted on the end of a fiber. Intensity data were collected on a Bruker-AXS SMART 1D diffractometer with CCD detector using Cu K $\alpha$  radiation. Structure solution was carried out using direct methods<sup>21</sup> and refined by least-squares techniques on F<sup>2</sup>. Figures were prepared using ORTEP.<sup>22</sup> Two benzene molecules and hydrogen atoms have been omitted for clarity.

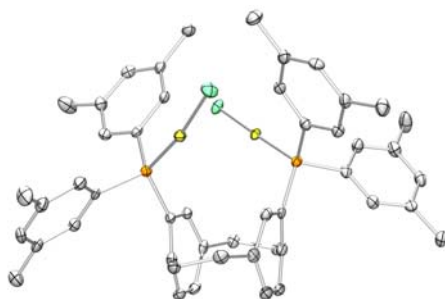

|                        |                                                                                           |
|------------------------|-------------------------------------------------------------------------------------------|
| Empirical formula      | C <sub>60</sub> H <sub>62</sub> Au <sub>2</sub> Cl <sub>2</sub> P <sub>2</sub>            |
| Formula weight         | 1309.87                                                                                   |
| Temperature            | 100(2) K                                                                                  |
| Crystal system         | Orthorhombic                                                                              |
| Space group            | P 2 <sub>1</sub> 2 <sub>1</sub> 2 <sub>1</sub>                                            |
| Unit cell dimensions   | a = 11.4778(2) Å    α = 90°<br>b = 16.5221(3) Å    β = 90°<br>c = 27.7080(4) Å    γ = 90° |
| Unit cell volume       | 5254.47(15) Å <sup>3</sup>                                                                |
| Z                      | 4                                                                                         |
| Density (calculated)   | 1.656 mg/m <sup>3</sup>                                                                   |
| Absorption coefficient | 12.140 mm <sup>-1</sup>                                                                   |

<sup>21</sup> Altomare, A.; Casciarano, G.; Giacovazzo, C.; Guagliardi, A.; Burla, M. C.; Polidori, G.; Camalli, M. *J. Appl. Cryst.* **1994**, *27*, 435.

<sup>22</sup> Farrugia, L. *J. Appl. Cryst.* **1997**, *30*, 565.

|                                      |                                              |
|--------------------------------------|----------------------------------------------|
| Crystal size                         | $0.27 \times 0.25 \times 0.068 \text{ mm}^3$ |
| Theta range for data collection      | 3.11 - 70.0°                                 |
| Reflections collected                | 48339                                        |
| Independent reflections              | 9953                                         |
| Absorption correction                | Numerical                                    |
| Data / restraints / parameters       | 9953 / 36 / 603                              |
| Flack parameter                      | -0.002(6)                                    |
| Goodness-of-fit on $F^2$             | 1.034                                        |
| Final R-indices [ $I > 2\sigma(I)$ ] | R1 = 0.0247, wR2 = 0.0621                    |
| R indices (all data)                 | R1 = 0.0252, wR2 = 0.0625                    |
